# Supplementary material for: APOA1 Is a Novel Marker for Preeclampsia
Source: Int J Mol Sci. 2023 Nov 15;24(22):16363. doi: 10.3390/ijms242216363 (PMC10671820; doi:10.3390/ijms242216363)
Supplement: Supplementary file 1 [file ijms-24-16363-s001.zip › Supplementary Table S1.csv]

EntrezID	logFC	baseMean	lfcSE	stat	P.Value	adj.P.Val	Symbols	Name
20720	3.0671	134.77	0.52297	5.8648	4.4975e-09	4.2506e-05	Serpine2	"serine (or cysteine) peptidase inhibitor, clade E, member 2"
17392	2.111	326.3	0.44073	4.7898	1.6699e-06	0.0078909	Mmp3	matrix metallopeptidase 3
12870	2.2466	98.743	0.52835	4.252	2.1187e-05	0.066747	Cp	ceruloplasmin
16971	1.2228	211.72	0.31743	3.8522	0.00011708	0.27662	Lrp1	low density lipoprotein receptor-related protein 1
16664	-4.762	14.085	1.3672	-3.483	0.00049588	0.93731	Krt14	keratin 14
16998	1.0746	281.42	0.31913	3.3674	0.00075889	0.99999	Ltbp3	latent transforming growth factor beta binding protein 3
53624	-1.7871	35.685	0.54055	-3.3061	0.00094618	0.99999	Cldn7	claudin 7
16414	1.7113	50.194	0.52434	3.2638	0.0010993	0.99999	Itgb2	integrin beta 2
19842	5.8377	5.2486	1.9059	3.063	0.0021911	0.99999	Rnu1a1	U1a1 small nuclear RNA
109151	1.1933	84.509	0.39253	3.04	0.0023661	0.99999	Chd9	chromodomain helicase DNA binding protein 9
12298	-2.8952	14.743	0.95522	-3.0309	0.0024382	0.99999	Cacnb4	"calcium channel, voltage-dependent, beta 4 subunit"
16828	-0.7375	1558.2	0.24397	-3.0229	0.0025037	0.99999	Ldha	lactate dehydrogenase A
14069	3.4626	14.913	1.1632	2.9767	0.0029136	0.99999	F8	coagulation factor VIII
12985	0.89918	217.5	0.31233	2.8789	0.0039903	0.99999	Csf3	colony stimulating factor 3 (granulocyte)
12424	3.265	15.9	1.1462	2.8486	0.0043909	0.99999	Cck	cholecystokinin
53868	-2.0202	17.738	0.74462	-2.7131	0.0066667	0.99999	Rab25	"RAB25, member RAS oncogene family"
69221	0.86452	394.76	0.31928	2.7077	0.0067749	0.99999	2410006H16Rik	RIKEN cDNA 2410006H16 gene
20568	1.6831	70.869	0.62963	2.6732	0.0075129	0.99999	Slpi	secretory leukocyte peptidase inhibitor
55948	-1.2594	64.49	0.47418	-2.6559	0.0079086	0.99999	Sfn	stratifin
12162	1.4815	31.288	0.57194	2.5903	0.0095894	0.99999	Bmp7	bone morphogenetic protein 7
68763	0.75152	352.19	0.29117	2.5811	0.0098499	0.99999	1110038B12Rik	RIKEN cDNA 1110038B12 gene
15245	2.5944	10.545	1.026	2.5287	0.011447	0.99999	Hhip	Hedgehog-interacting protein
12994	1.8629	18.486	0.74112	2.5136	0.01195	0.99999	Csn3	casein kappa
244895	1.0243	74.814	0.41045	2.4956	0.012573	0.99999	Peak1	pseudopodium-enriched atypical kinase 1
228608	1.0137	102.1	0.40789	2.4853	0.012946	0.99999	Smox	spermine oxidase
276770	-0.60762	1517.6	0.24602	-2.4698	0.01352	0.99999	Eif5a	eukaryotic translation initiation factor 5A
16782	-0.60119	365.6	0.25475	-2.3599	0.01828	0.99999	Lamc2	"laminin, gamma 2"
12833	1.6419	21.513	0.69584	2.3596	0.018295	0.99999	Col6a1	"collagen, type VI, alpha 1"
19035	0.59279	959.46	0.2581	2.2968	0.021633	0.99999	Ppib	peptidylprolyl isomerase B
23959	1.0161	84.851	0.44314	2.293	0.021849	0.99999	Nt5e	"5' nucleotidase, ecto"
19817	1.5365	47.313	0.67462	2.2776	0.022749	0.99999	Rn7sk	"RNA, 7SK, nuclear"
93695	1.2634	44.169	0.55562	2.2739	0.022974	0.99999	Gpnmb	glycoprotein (transmembrane) nmb
81877	5.0403	3.0228	2.2246	2.2657	0.023472	0.99999	Tnxb	tenascin XB
15510	-0.5819	491.84	0.25801	-2.2554	0.024109	0.99999	Hspd1	heat shock protein 1 (chaperonin)
20296	-2.9303	8.659	1.3055	-2.2446	0.024795	0.99999	Ccl2	chemokine (C-C motif) ligand 2
278279	0.90485	1229.4	0.4048	2.2353	0.025396	0.99999	Tmtc2	transmembrane and tetratricopeptide repeat containing 2
114606	1.6787	17.793	0.75444	2.2251	0.026076	0.99999	Tle6	transducin-like enhancer of split 6
12389	-1.3156	29.659	0.59589	-2.2079	0.027253	0.99999	Cav1	"caveolin 1, caveolae protein"
110599589	4.9092	2.7589	2.225	2.2064	0.027359	0.99999	Asdurf	ASNSD1 upstream reading frame
110323	-0.69687	321.88	0.31939	-2.1819	0.029119	0.99999	Cox6b1	"cytochrome c oxidase, subunit 6B1"
14620	-1.0053	47.495	0.46306	-2.171	0.029927	0.99999	Gjb3	"gap junction protein, beta 3"
18007	0.8263	88.677	0.38286	2.1582	0.030911	0.99999	Neo1	neogenin
434341	1.4991	19.996	0.69496	2.1571	0.031001	0.99999	Nlrc5	"NLR family, CARD domain containing 5"
53599	0.66276	205.14	0.31024	2.1363	0.032656	0.99999	Cd164	CD164 antigen
20194	-0.49364	892.51	0.23136	-2.1337	0.032871	0.99999	S100a10	S100 calcium binding protein A10 (calpactin)
11669	0.53925	411.69	0.25278	2.1333	0.032903	0.99999	Aldh2	"aldehyde dehydrogenase 2, mitochondrial"
66540	0.86109	128.03	0.40389	2.132	0.033005	0.99999	Fam107b	"family with sequence similarity 107, member B"
217169	0.8959	150.35	0.42289	2.1185	0.034131	0.99999	Tns4	tensin 4
24075	-0.90817	158.85	0.42909	-2.1165	0.0343	0.99999	Taf10	TATA-box binding protein associated factor 10
19663	1.2831	26.56	0.61156	2.0982	0.035892	0.99999	Rbpms	RNA binding protein gene with multiple splicing
68178	0.77893	101.68	0.37159	2.0962	0.036063	0.99999	Cgnl1	cingulin-like 1
171395	-1.3513	24.904	0.64761	-2.0866	0.036923	0.99999	Pkd1l1	polycystic kidney disease 1 like 1
16592	-0.66995	241.7	0.32298	-2.0743	0.038056	0.99999	Fabp5	"fatty acid binding protein 5, epidermal"
19156	0.54479	350.49	0.26363	2.0665	0.038784	0.99999	Psap	prosaposin
107686	-0.73629	95.483	0.35695	-2.0627	0.039137	0.99999	Snrpd2	small nuclear ribonucleoprotein D2
13400	1.2163	26.545	0.59667	2.0384	0.041505	0.99999	Dmpk	dystrophia myotonica-protein kinase
67573	-0.94759	46.224	0.46505	-2.0376	0.04159	0.99999	Loxl4	lysyl oxidase-like 4
14873	-0.67737	140.51	0.33284	-2.0352	0.041834	0.99999	Gsto1	glutathione S-transferase omega 1
13039	0.51392	1748	0.25498	2.0155	0.043853	0.99999	Ctsl	cathepsin L
100034363	-4.7715	2.5203	2.3696	-2.0136	0.044052	0.99999	Tmsb15b2	thymosin beta 15b2
18599	1.4565	17.789	0.72456	2.0101	0.044416	0.99999	Padi1	"peptidyl arginine deiminase, type I"
14325	-0.47027	2652.9	0.23449	-2.0055	0.04491	0.99999	Ftl1	ferritin light polypeptide 1
26905	-0.60081	180.22	0.30041	-2	0.045505	0.99999	Eif2s3x	"eukaryotic translation initiation factor 2, subunit 3, structural gene X-linked"
69219	-0.94798	54.906	0.47604	-1.9914	0.046437	0.99999	Ddah1	dimethylarginine dimethylaminohydrolase 1
18602	0.64674	208.15	0.32538	1.9877	0.04685	0.99999	Padi4	"peptidyl arginine deiminase, type IV"
94180	0.76444	82.022	0.38524	1.9843	0.047221	0.99999	Acsbg1	acyl-CoA synthetase bubblegum family member 1
56753	-1.1615	32.374	0.58632	-1.981	0.04759	0.99999	Tacstd2	tumor-associated calcium signal transducer 2
22608	-0.53771	890.79	0.27217	-1.9756	0.048196	0.99999	Ybx1	Y box protein 1
59012	-1.6099	15.185	0.81666	-1.9713	0.048688	0.99999	Moxd1	"monooxygenase, DBH-like 1"
11615	-0.62644	234.64	0.31868	-1.9658	0.049327	0.99999	Gm4737	predicted gene 4737
19285	-0.60898	144.22	0.31255	-1.9484	0.051366	0.99999	Cavin1	caveolae associated 1
15528	-0.54034	303.57	0.27734	-1.9483	0.051381	0.99999	Hspe1	heat shock protein 1 (chaperonin 10)
11740	-0.49409	586.5	0.25393	-1.9458	0.051683	0.99999	Slc25a5	"solute carrier family 25 (mitochondrial carrier, adenine nucleotide translocator), member 5"
17069	-1.1635	28.439	0.59863	-1.9436	0.051943	0.99999	Ly6e	"lymphocyte antigen 6 complex, locus E"
12876	0.53033	365.84	0.27331	1.9404	0.052335	0.99999	Cpe	carboxypeptidase E
75577	-1.4307	24.876	0.73857	-1.9371	0.052734	0.99999	Dynap	dynactin associated protein
22145	-0.6406	205.85	0.33078	-1.9366	0.052789	0.99999	Tuba4a	"tubulin, alpha 4A"
241568	-1.5172	16.42	0.78666	-1.9287	0.053772	0.99999	Lrrc4c	leucine rich repeat containing 4C
15505	0.74292	137.23	0.38675	1.9209	0.054738	0.99999	Hsph1	heat shock 105kDa/110kDa protein 1
230857	0.80675	106.24	0.42095	1.9165	0.055304	0.99999	Ece1	endothelin converting enzyme 1
11768	-2.6519	5.4842	1.3843	-1.9157	0.055398	0.99999	Ap1m2	"adaptor protein complex AP-1, mu 2 subunit"
80914	-0.63831	128.06	0.33549	-1.9026	0.057091	0.99999	Uck2	uridine-cytidine kinase 2
17711	0.40778	4655.8	0.21496	1.897	0.057827	0.99999	mt-Cytb	"cytochrome b, mitochondrial"
19899	-0.43011	1550.6	0.22741	-1.8914	0.058575	0.99999	Rpl18	ribosomal protein L18
240119	-2.1868	12.419	1.1567	-1.8906	0.058674	0.99999	St6gal2	"beta galactoside alpha 2,6 sialyltransferase 2"
73910	1.0425	31.26	0.55283	1.8858	0.059317	0.99999	Arhgap18	Rho GTPase activating protein 18
236539	-0.5362	319.43	0.28469	-1.8835	0.059636	0.99999	Phgdh	3-phosphoglycerate dehydrogenase
225372	1.6728	12.548	0.88919	1.8813	0.059932	0.99999	Apbb3	"amyloid beta (A4) precursor protein-binding, family B, member 3"
110310	-0.50126	301.26	0.26705	-1.8771	0.060511	0.99999	Krt7	keratin 7
110196	-0.56877	404.45	0.30407	-1.8705	0.061413	0.99999	Fdps	farnesyl diphosphate synthetase
12468	-0.48878	323.2	0.26162	-1.8683	0.061726	0.99999	Cct7	"chaperonin containing Tcp1, subunit 7 (eta)"
12010	0.50161	935.86	0.26891	1.8654	0.062129	0.99999	B2m	beta-2 microglobulin
319670	0.84077	51.482	0.45319	1.8552	0.063564	0.99999	Eml5	echinoderm microtubule associated protein like 5
78749	0.76281	723.63	0.41143	1.854	0.063734	0.99999	Filip1l	filamin A interacting protein 1-like
69504	-1.3344	18.532	0.72063	-1.8518	0.06406	0.99999	Zfp932	zinc finger protein 932
17698	-0.43753	684.03	0.23679	-1.8477	0.06464	0.99999	Msn	moesin
11820	0.56308	177.82	0.3073	1.8324	0.066898	0.99999	App	amyloid beta (A4) precursor protein
19782	1.8781	12.705	1.0325	1.8189	0.068923	0.99999	Rmrp	RNA component of mitochondrial RNAase P
20498	0.81345	52.24	0.44746	1.8179	0.069076	0.99999	Slc12a4	"solute carrier family 12, member 4"
17318	-1.4536	15.923	0.80303	-1.8102	0.07027	0.99999	Mid1	midline 1
16525	-0.79722	53.458	0.44234	-1.8023	0.071502	0.99999	Kcnk1	"potassium channel, subfamily K, member 1"
24059	0.69802	81.897	0.38749	1.8014	0.071645	0.99999	Slco2a1	"solute carrier organic anion transporter family, member 2a1"
76453	-1.3552	18.664	0.75239	-1.8011	0.07168	0.99999	Prss23	"protease, serine 23"
52468	0.69854	84.311	0.38867	1.7973	0.072292	0.99999	Ctdsp2	"CTD (carboxy-terminal domain, RNA polymerase II, polypeptide A) small phosphatase 2"
16819	2.3242	78.602	1.2956	1.7939	0.072827	0.99999	Lcn2	lipocalin 2
319387	1.0885	39.949	0.60856	1.7887	0.073668	0.99999	Adgrl3	adhesion G protein-coupled receptor L3
382083	1.5505	11.768	0.86958	1.783	0.07458	0.99999	Snx22	sorting nexin 22
17309	4.4553	2.0152	2.5024	1.7804	0.075006	0.99999	Mgat3	mannoside acetylglucosaminyltransferase 3
12696	0.73035	68.353	0.41143	1.7752	0.075868	0.99999	Cirbp	cold inducible RNA binding protein
20692	0.68225	84.96	0.38449	1.7744	0.075996	0.99999	Sparc	secreted acidic cysteine rich glycoprotein
19272	0.82036	50.962	0.46256	1.7735	0.076139	0.99999	Ptprk	"protein tyrosine phosphatase, receptor type, K"
17975	-0.48222	1201.8	0.27229	-1.771	0.076567	0.99999	Ncl	nucleolin
13629	0.38038	2837.4	0.215	1.7692	0.076858	0.99999	Eef2	eukaryotic translation elongation factor 2
67603	0.95508	93.508	0.54083	1.766	0.077404	0.99999	Dusp6	dual specificity phosphatase 6
56282	-0.69663	104.48	0.39487	-1.7642	0.0777	0.99999	Mrpl12	mitochondrial ribosomal protein L12
30926	-0.62407	103.83	0.35457	-1.7601	0.078397	0.99999	Glrx3	glutaredoxin 3
13167	-0.47356	360.29	0.26985	-1.7549	0.079271	0.99999	Dbi	diazepam binding inhibitor
22192	-0.5458	178.18	0.31148	-1.7523	0.079724	0.99999	Ube2m	ubiquitin-conjugating enzyme E2M
329152	3.7106	3.535	2.1178	1.7521	0.07976	0.99999	Hecw2	"HECT, C2 and WW domain containing E3 ubiquitin protein ligase 2"
108705	0.50526	191.31	0.28892	1.7488	0.080323	0.99999	Pttg1ip	pituitary tumor-transforming 1 interacting protein
76884	-0.56008	196.78	0.32129	-1.7432	0.081293	0.99999	Cyfip2	cytoplasmic FMR1 interacting protein 2
53333	-0.64496	106.66	0.37134	-1.7368	0.082417	0.99999	Tomm40	translocase of outer mitochondrial membrane 40
68797	1.5958	12.053	0.91935	1.7358	0.082605	0.99999	Pdgfrl	platelet-derived growth factor receptor-like
216859	-1.2641	22.118	0.72945	-1.7329	0.083106	0.99999	Acap1	"ArfGAP with coiled-coil, ankyrin repeat and PH domains 1"
56442	0.5572	131.24	0.32404	1.7196	0.085512	0.99999	Serinc1	serine incorporator 1
108075	0.9538	38.87	0.55476	1.7193	0.085561	0.99999	Ltbp4	latent transforming growth factor beta binding protein 4
11958	-0.59059	232.04	0.34463	-1.7137	0.08659	0.99999	Atp5k	"ATP synthase, H+ transporting, mitochondrial F1F0 complex, subunit E"
26440	-0.50221	191.3	0.29309	-1.7135	0.086622	0.99999	Psma1	proteasome subunit alpha 1
11799	-0.53099	203.96	0.3104	-1.7107	0.087144	0.99999	Birc5	baculoviral IAP repeat-containing 5
66167	-0.5159	188.54	0.30194	-1.7086	0.087525	0.99999	Tma7	translational machinery associated 7
69953	-0.79858	58.873	0.46788	-1.7068	0.087855	0.99999	2810025M15Rik	RIKEN cDNA 2810025M15 gene
21991	-0.41156	712.47	0.24162	-1.7034	0.088501	0.99999	Tpi1	triosephosphate isomerase 1
70097	1.1219	24.456	0.66017	1.6995	0.089234	0.99999	Sash1	SAM and SH3 domain containing 1
102639653	-4.4211	1.9722	2.6049	-1.6972	0.089652	0.99999	Gm2007	predicted gene 2007
54446	0.76747	58.499	0.45249	1.6961	0.089865	0.99999	Nfat5	nuclear factor of activated T cells 5
27050	-0.45572	1110	0.26881	-1.6953	0.090019	0.99999	Rps3	ribosomal protein S3
16776	0.54568	237.54	0.32281	1.6904	0.090953	0.99999	Lama5	"laminin, alpha 5"
13848	1.7472	9.8046	1.036	1.6864	0.091714	0.99999	Ephb6	Eph receptor B6
16512	3.6033	3.2736	2.143	1.6814	0.092676	0.99999	Kcnh3	"potassium voltage-gated channel, subfamily H (eag-related), member 3"
30878	0.83201	74.573	0.49514	1.6804	0.092886	0.99999	Apln	apelin
20855	1.1887	18.003	0.70767	1.6798	0.093002	0.99999	Stc1	stanniocalcin 1
13034	-0.83649	79.941	0.49943	-1.6749	0.093957	0.99999	Ctse	cathepsin E
15903	0.84643	83.247	0.50624	1.672	0.094529	0.99999	Id3	inhibitor of DNA binding 3
56876	0.85197	37.806	0.50984	1.671	0.094712	0.99999	Nsmf	NMDA receptor synaptonuclear signaling and neuronal migration factor
110460	-0.7129	108.59	0.42664	-1.671	0.094728	0.99999	Acat2	acetyl-Coenzyme A acetyltransferase 2
20724	-2.4069	4.726	1.4521	-1.6576	0.097408	0.99999	Serpinb5	"serine (or cysteine) peptidase inhibitor, clade B, member 5"
66142	-0.76531	205.21	0.46194	-1.6567	0.097576	0.99999	Cox7b	cytochrome c oxidase subunit 7B
233870	-0.60027	90.739	0.36266	-1.6552	0.09789	0.99999	Tufm	"Tu translation elongation factor, mitochondrial"
66102	-0.78357	62.048	0.47433	-1.652	0.098545	0.99999	Cxcl16	chemokine (C-X-C motif) ligand 16
11757	-0.65353	76.014	0.3957	-1.6516	0.098623	0.99999	Prdx3	peroxiredoxin 3
237360	1.209	16.51	0.73301	1.6493	0.099084	0.99999	Adamts14	"a disintegrin-like and metallopeptidase (reprolysin type) with thrombospondin type 1 motif, 14"
12981	1.402	21.636	0.8528	1.644	0.10018	0.99999	Csf2	colony stimulating factor 2 (granulocyte-macrophage)
20768	-0.7491	51.009	0.45636	-1.6415	0.1007	0.99999	Sephs2	selenophosphate synthetase 2
16774	-1.0835	24.159	0.6604	-1.6406	0.10088	0.99999	Lama3	"laminin, alpha 3"
26897	2.7054	3.7539	1.6494	1.6402	0.10096	0.99999	Acot1	acyl-CoA thioesterase 1
11889	2.8043	4.0206	1.7109	1.6391	0.1012	0.99999	Asgr1	asialoglycoprotein receptor 1
14228	-0.48674	188.36	0.29731	-1.6371	0.1016	0.99999	Fkbp4	FK506 binding protein 4
22421	-0.99513	24.76	0.60884	-1.6345	0.10216	0.99999	Wnt7a	"wingless-type MMTV integration site family, member 7A"
66477	-0.44359	494.64	0.27173	-1.6325	0.10258	0.99999	Atp5md	ATP synthase membrane subunit DAPIT
71960	-2.4863	4.9471	1.5252	-1.6302	0.10306	0.99999	Myh14	"myosin, heavy polypeptide 14"
216440	0.75204	47.558	0.46244	1.6263	0.10389	0.99999	Os9	amplified in osteosarcoma
22436	0.97574	29.5	0.60051	1.6249	0.10419	0.99999	Xdh	xanthine dehydrogenase
102637264	-0.89015	34.951	0.5502	-1.6178	0.1057	0.99999	Gm12132	predicted gene 12132
21346	-0.43965	476.21	0.27208	-1.6159	0.10612	0.99999	Tagln2	transgelin 2
15901	0.91669	48.849	0.5683	1.613	0.10674	0.99999	Id1	"inhibitor of DNA binding 1, HLH protein"
56449	-0.44164	280.67	0.2745	-1.6089	0.10763	0.99999	Ybx3	Y box protein 3
11671	0.84699	42.609	0.52674	1.608	0.10784	0.99999	Aldh3a2	"aldehyde dehydrogenase family 3, subfamily A2"
19384	-0.44903	440.65	0.27938	-1.6072	0.108	0.99999	Ran	"RAN, member RAS oncogene family"
14049	0.88547	35.445	0.55167	1.6051	0.10847	0.99999	Eya2	EYA transcriptional coactivator and phosphatase 2
71946	-0.70164	53.944	0.43749	-1.6038	0.10877	0.99999	Endod1	endonuclease domain containing 1
20646	-1.3537	12.468	0.84544	-1.6011	0.10935	0.99999	Snrpn	small nuclear ribonucleoprotein N
27226	1.473	11.266	0.92143	1.5985	0.10992	0.99999	Pla2g7	"phospholipase A2, group VII (platelet-activating factor acetylhydrolase, plasma)"
110391	-0.71488	59.606	0.4478	-1.5964	0.11039	0.99999	Qdpr	quinoid dihydropteridine reductase
20200	-0.35034	3472.3	0.2196	-1.5954	0.11063	0.99999	S100a6	S100 calcium binding protein A6 (calcyclin)
328949	-0.82099	56.194	0.51589	-1.5914	0.11152	0.99999	Mcc	mutated in colorectal cancers
20068	-0.34829	1679.2	0.21907	-1.5899	0.11187	0.99999	Rps17	ribosomal protein S17
103677	0.96621	39.945	0.60862	1.5876	0.11239	0.99999	Smg6	"Smg-6 homolog, nonsense mediated mRNA decay factor (C. elegans)"
20133	-0.54272	112.07	0.34243	-1.5849	0.11299	0.99999	Rrm1	ribonucleotide reductase M1
21854	-0.67376	70.805	0.42515	-1.5848	0.11302	0.99999	Timm17a	translocase of inner mitochondrial membrane 17a
16669	-0.78635	134	0.49642	-1.5841	0.11318	0.99999	Krt19	keratin 19
56177	0.93412	53.288	0.58985	1.5837	0.11327	0.99999	Olfm1	olfactomedin 1
67095	0.45683	336.66	0.28883	1.5817	0.11372	0.99999	Trak1	"trafficking protein, kinesin binding 1"
13824	-1.5767	8.9707	0.99835	-1.5793	0.11426	0.99999	Epb41l4a	erythrocyte membrane protein band 4.1 like 4a
15353	0.64952	71.899	0.41175	1.5775	0.11469	0.99999	Hmg20b	high mobility group 20B
19128	1.9351	6.0073	1.2273	1.5767	0.11486	0.99999	Pros1	protein S (alpha)
59090	0.59567	80.826	0.37871	1.5729	0.11574	0.99999	Midn	midnolin
52530	-0.56069	186.63	0.35677	-1.5716	0.11605	0.99999	Nhp2	NHP2 ribonucleoprotein
11465	-0.49012	2030.8	0.31216	-1.5701	0.1164	0.99999	Actg1	"actin, gamma, cytoplasmic 1"
27008	0.66964	61.955	0.42684	1.5688	0.11669	0.99999	Micall1	"microtubule associated monooxygenase, calponin and LIM domain containing -like 1"
14635	-0.50787	139.6	0.3245	-1.5651	0.11756	0.99999	Galk1	galactokinase 1
110959	-1.1091	19.807	0.7101	-1.5619	0.11831	0.99999	Nudt19	nudix (nucleoside diphosphate linked moiety X)-type motif 19
11739	-0.4143	373.55	0.26572	-1.5592	0.11896	0.99999	Slc25a4	"solute carrier family 25 (mitochondrial carrier, adenine nucleotide translocator), member 4"
269713	0.83217	33.251	0.53582	1.5531	0.1204	0.99999	Clip2	CAP-GLY domain containing linker protein 2
14113	-0.45509	246.44	0.29342	-1.551	0.12091	0.99999	Fbl	fibrillarin
21886	1.7297	7.5059	1.1174	1.548	0.12163	0.99999	Tle2	transducin-like enhancer of split 2
20201	3.4803	3.0257	2.2531	1.5447	0.12243	0.99999	S100a8	S100 calcium binding protein A8 (calgranulin A)
18002	-0.49898	165.69	0.32346	-1.5427	0.12291	0.99999	Nedd8	"neural precursor cell expressed, developmentally down-regulated gene 8"
382014	0.82655	32.502	0.53792	1.5366	0.1244	0.99999	Ano8	anoctamin 8
11489	-1.5295	9.7043	0.99587	-1.5358	0.12458	0.99999	Adam12	a disintegrin and metallopeptidase domain 12 (meltrin alpha)
11732	0.6145	126.66	0.40123	1.5315	0.12564	0.99999	Ank	progressive ankylosis
13731	0.5312	101.3	0.34694	1.5311	0.12575	0.99999	Emp2	epithelial membrane protein 2
60595	-0.4489	219.95	0.29325	-1.5308	0.12583	0.99999	Actn4	actinin alpha 4
237400	0.63854	62.591	0.41753	1.5293	0.12618	0.99999	Mex3d	mex3 RNA binding family member D
17127	0.64908	66.558	0.42458	1.5287	0.12633	0.99999	Smad3	SMAD family member 3
14972	0.52003	1134.5	0.34044	1.5275	0.12663	0.99999	H2-K1	"histocompatibility 2, K1, K region"
74155	0.534	194.78	0.34993	1.526	0.12701	0.99999	Errfi1	ERBB receptor feedback inhibitor 1
230099	0.72863	52.189	0.47785	1.5248	0.12731	0.99999	Car9	carbonic anhydrase 9
75612	0.66385	54.8	0.43571	1.5236	0.12761	0.99999	Gns	glucosamine (N-acetyl)-6-sulfatase
100503724	-0.65917	63.337	0.43299	-1.5224	0.12792	0.99999	Dnajc19-ps	"DnaJ heat shock protein family (Hsp40) member C19, pseudogene"
18542	0.76299	45.099	0.50199	1.5199	0.12853	0.99999	Pcolce	procollagen C-endopeptidase enhancer protein
21973	-0.38368	365.42	0.25256	-1.5192	0.12872	0.99999	Top2a	topoisomerase (DNA) II alpha
75723	0.61659	84.604	0.40661	1.5164	0.12941	0.99999	Amotl1	angiomotin-like 1
19989	-0.33231	1827	0.21952	-1.5138	0.13008	0.99999	Rpl7	ribosomal protein L7
68563	-0.70205	46.763	0.46432	-1.512	0.13054	0.99999	Dpm3	dolichyl-phosphate mannosyltransferase polypeptide 3
12226	0.51663	112.72	0.3417	1.5119	0.13055	0.99999	Btg1	BTG anti-proliferation factor 1
20893	-0.83472	79.995	0.55361	-1.5078	0.13161	0.99999	Bhlhe40	"basic helix-loop-helix family, member e40"
13877	-0.43448	289.33	0.28817	-1.5077	0.13162	0.99999	Erh	ERH mRNA splicing and mitosis factor
14964	0.49817	542.35	0.33099	1.5051	0.13229	0.99999	H2-D1	"histocompatibility 2, D region locus 1"
13855	0.68898	57.362	0.45829	1.5034	0.13275	0.99999	Epn2	epsin 2
70354	0.86452	29.555	0.57914	1.4928	0.1355	0.99999	Secisbp2l	SECIS binding protein 2-like
73710	-1.4036	10.939	0.9417	-1.4905	0.13609	0.99999	Tubb2b	"tubulin, beta 2B class IIB"
71918	0.72614	43.072	0.48736	1.4899	0.13624	0.99999	Zcchc24	"zinc finger, CCHC domain containing 24"
270097	0.91497	33.098	0.61438	1.4892	0.13642	0.99999	Vat1l	vesicle amine transport protein 1 like
18194	-0.86851	44.7	0.58347	-1.4885	0.13661	0.99999	Nsdhl	NAD(P) dependent steroid dehydrogenase-like
329384	-0.71998	43.719	0.48371	-1.4884	0.13663	0.99999	Ptrh1	peptidyl-tRNA hydrolase 1 homolog
107771	-1.9967	5.0037	1.3437	-1.486	0.13729	0.99999	Bmyc	brain expressed myelocytomatosis oncogene
100862446	-1.4386	10.265	0.96837	-1.4856	0.13739	0.99999	LOC100862446	ferritin light chain 1
18637	-0.50878	129.41	0.34252	-1.4854	0.13744	0.99999	Pfdn2	prefoldin 2
78329	4.038	1.5087	2.7198	1.4847	0.13763	0.99999	2310010J17Rik	RIKEN cDNA 2310010J17 gene
64659	-0.65512	52.216	0.4434	-1.4775	0.13955	0.99999	Mrps14	mitochondrial ribosomal protein S14
230157	-0.80795	31.711	0.54731	-1.4762	0.13988	0.99999	Tmeff1	transmembrane protein with EGF-like and two follistatin-like domains 1
11951	-0.5068	185.55	0.34335	-1.4761	0.13993	0.99999	Atp5g1	"ATP synthase, H+ transporting, mitochondrial F0 complex, subunit C1 (subunit 9)"
57296	-0.43492	234.9	0.29469	-1.4759	0.13998	0.99999	Psmd8	"proteasome (prosome, macropain) 26S subunit, non-ATPase, 8"
66181	-0.73172	45.311	0.49582	-1.4758	0.14	0.99999	Nop10	NOP10 ribonucleoprotein
97998	1.2303	12.518	0.83429	1.4746	0.14032	0.99999	Deptor	DEP domain containing MTOR-interacting protein
20656	-0.54684	94.341	0.37089	-1.4744	0.14037	0.99999	Sod2	"superoxide dismutase 2, mitochondrial"
20195	-0.3784	2986.8	0.25665	-1.4744	0.14038	0.99999	S100a11	S100 calcium binding protein A11
107765	0.52534	137.4	0.35681	1.4723	0.14093	0.99999	Ankrd1	ankyrin repeat domain 1 (cardiac muscle)
353169	7.0486	12.155	4.7893	1.4717	0.14109	0.99999	Slc2a12	"solute carrier family 2 (facilitated glucose transporter), member 12"
208198	1.1061	17.227	0.75205	1.4707	0.14136	0.99999	Btbd2	BTB (POZ) domain containing 2
67023	0.61438	65.112	0.41821	1.4691	0.14181	0.99999	Use1	unconventional SNARE in the ER 1 homolog (S. cerevisiae)
22272	-0.45759	176.38	0.31248	-1.4644	0.14309	0.99999	Uqcrq	"ubiquinol-cytochrome c reductase, complex III subunit VII"
12153	0.533	146.1	0.36526	1.4592	0.14451	0.99999	Bmp1	bone morphogenetic protein 1
69804	-0.67448	53.293	0.46226	-1.4591	0.14454	0.99999	Tmem147	transmembrane protein 147
21681	-0.53879	96.984	0.36946	-1.4583	0.14476	0.99999	Alyref	Aly/REF export factor
101437	-0.72534	39.202	0.4976	-1.4577	0.14493	0.99999	Dhx32	DEAH (Asp-Glu-Ala-His) box polypeptide 32
56338	1.1688	21.843	0.80206	1.4573	0.14504	0.99999	Txnip	thioredoxin interacting protein
19224	0.96086	21.982	0.65943	1.4571	0.14508	0.99999	Ptgs1	prostaglandin-endoperoxide synthase 1
50785	-0.81309	35.869	0.56016	-1.4515	0.14663	0.99999	Hs6st1	heparan sulfate 6-O-sulfotransferase 1
11898	-1.2904	11.244	0.88899	-1.4515	0.14663	0.99999	Ass1	argininosuccinate synthetase 1
52666	0.88684	26.306	0.61131	1.4507	0.14685	0.99999	Arhgef25	Rho guanine nucleotide exchange factor (GEF) 25
108147	-0.48242	124.31	0.33266	-1.4502	0.14701	0.99999	Atic	5-aminoimidazole-4-carboxamide ribonucleotide formyltransferase/IMP cyclohydrolase
21677	-0.61703	69.33	0.4264	-1.4471	0.14788	0.99999	Tead2	TEA domain family member 2
66656	-0.41651	289.1	0.28798	-1.4463	0.1481	0.99999	Eef1d	eukaryotic translation elongation factor 1 delta (guanine nucleotide exchange protein)
12527	0.37315	563.5	0.25802	1.4462	0.14812	0.99999	Cd9	CD9 antigen
211401	0.68043	89.234	0.47073	1.4455	0.14832	0.99999	Mtss1	MTSS I-BAR domain containing 1
11826	1.5964	10.074	1.1045	1.4454	0.14835	0.99999	Aqp1	aquaporin 1
56347	-0.42086	224.78	0.29145	-1.444	0.14874	0.99999	Eif3c	"eukaryotic translation initiation factor 3, subunit C"
12286	-1.6802	10.598	1.1654	-1.4417	0.14938	0.99999	Cacna1a	"calcium channel, voltage-dependent, P/Q type, alpha 1A subunit"
58185	-3.5605	3.1939	2.4717	-1.4405	0.14972	0.99999	Rsad2	radical S-adenosyl methionine domain containing 2
51788	-0.33512	778.95	0.23288	-1.439	0.15014	0.99999	H2az1	H2A.Z variant histone 1
74202	0.65898	56.578	0.45827	1.438	0.15044	0.99999	Fblim1	filamin binding LIM protein 1
66373	-0.5307	85.697	0.36924	-1.4373	0.15063	0.99999	Lsm5	"LSM5 homolog, U6 small nuclear RNA and mRNA degradation associated"
12462	-0.39464	337.83	0.27467	-1.4368	0.15078	0.99999	Cct3	"chaperonin containing Tcp1, subunit 3 (gamma)"
14609	0.42882	168.53	0.29865	1.4359	0.15104	0.99999	Gja1	"gap junction protein, alpha 1"
12266	0.96635	39.518	0.67309	1.4357	0.15109	0.99999	C3	complement component 3
226075	1.0408	18.232	0.72634	1.4329	0.15189	0.99999	Glis3	GLIS family zinc finger 3
18648	-0.38645	794.36	0.26982	-1.4323	0.15207	0.99999	Pgam1	phosphoglycerate mutase 1
77891	-0.38125	348.51	0.26624	-1.432	0.15215	0.99999	Ube2s	ubiquitin-conjugating enzyme E2S
20867	-0.41029	284.33	0.28665	-1.4313	0.15233	0.99999	Stip1	stress-induced phosphoprotein 1
77605	0.59587	76.237	0.41645	1.4308	0.15248	0.99999	H2az2	H2A.Z histone variant 2
209318	-0.52631	92.313	0.36831	-1.429	0.15301	0.99999	Gps1	G protein pathway suppressor 1
216739	1.2468	11.744	0.87308	1.4281	0.15327	0.99999	Acsl6	acyl-CoA synthetase long-chain family member 6
11857	-1.082	18.671	0.75779	-1.4279	0.15332	0.99999	Arhgdib	"Rho, GDP dissociation inhibitor (GDI) beta"
17708	0.30037	8501.5	0.21047	1.4271	0.15354	0.99999	mt-Co1	"cytochrome c oxidase I, mitochondrial"
16881	-0.55106	73.477	0.38739	-1.4225	0.15488	0.99999	Lig1	"ligase I, DNA, ATP-dependent"
15364	0.44275	159.7	0.31156	1.4211	0.15529	0.99999	Hmga2	high mobility group AT-hook 2
27395	-0.67476	45.536	0.47486	-1.421	0.15532	0.99999	Mrpl15	mitochondrial ribosomal protein L15
21976	0.75882	36.343	0.53596	1.4158	0.15683	0.99999	Top3b	topoisomerase (DNA) III beta
108167922	-0.31472	1246.4	0.2223	-1.4158	0.15684	0.99999	LOC108167922	60S ribosomal protein L27
19266	-0.77222	44.155	0.54935	-1.4057	0.15981	0.99999	Ptprd	"protein tyrosine phosphatase, receptor type, D"
67443	0.49633	110.59	0.35381	1.4028	0.16067	0.99999	Map1lc3b	microtubule-associated protein 1 light chain 3 beta
56320	0.59491	67.548	0.42416	1.4026	0.16074	0.99999	Dbn1	drebrin 1
73737	0.60156	71.654	0.42901	1.4022	0.16086	0.99999	1110008P14Rik	RIKEN cDNA 1110008P14 gene
20174	-0.48828	106.47	0.34853	-1.401	0.16123	0.99999	Ruvbl2	RuvB-like protein 2
102644	0.69472	188.52	0.49653	1.3992	0.16177	0.99999	Oaf	out at first homolog
12859	-0.42225	182.38	0.30187	-1.3988	0.16188	0.99999	Cox5b	cytochrome c oxidase subunit 5B
19025	0.6144	54.309	0.43947	1.3981	0.1621	0.99999	Ctsa	cathepsin A
66448	-0.54485	101.7	0.38978	-1.3978	0.16216	0.99999	Mrpl20	mitochondrial ribosomal protein L20
319899	1.5987	7.0047	1.1448	1.3965	0.16256	0.99999	Dock6	dedicator of cytokinesis 6
50995	-0.46439	121.06	0.33266	-1.396	0.16271	0.99999	Uba2	ubiquitin-like modifier activating enzyme 2
104307	6.6811	9.4205	4.7906	1.3946	0.16313	0.99999	Rnu12	"RNA U12, small nuclear"
11950	-0.42017	233.31	0.30184	-1.392	0.16391	0.99999	Atp5pb	ATP synthase peripheral stalk-membrane subunit b
215476	3.4716	3.0392	2.4973	1.3902	0.16448	0.99999	Prr14l	proline rich 14-like
20103	-0.31738	1455.9	0.22832	-1.39	0.16452	0.99999	Rps5	ribosomal protein S5
108115	1.008	30.941	0.72696	1.3866	0.16558	0.99999	Slco4a1	"solute carrier organic anion transporter family, member 4a1"
17347	0.55028	71.316	0.39726	1.3852	0.166	0.99999	Mknk2	MAP kinase-interacting serine/threonine kinase 2
15469	-0.36571	446.18	0.26417	-1.3844	0.16624	0.99999	Prmt1	protein arginine N-methyltransferase 1
20055	-0.3096	978.62	0.22394	-1.3825	0.16682	0.99999	Rps16	ribosomal protein S16
66276	-0.58279	101.55	0.42159	-1.3824	0.16686	0.99999	1810009A15Rik	RIKEN cDNA 1810009A15 gene
20085	-0.34124	696.8	0.24744	-1.3791	0.16787	0.99999	Rps19	ribosomal protein S19
16780	-0.61108	82.73	0.44428	-1.3754	0.169	0.99999	Lamb3	"laminin, beta 3"
80904	0.59195	57.478	0.4306	1.3747	0.16922	0.99999	Dtx3	"deltex 3, E3 ubiquitin ligase"
68603	-0.63629	58.829	0.4631	-1.374	0.16945	0.99999	Pmvk	phosphomevalonate kinase
433771	-0.57034	70.864	0.41517	-1.3738	0.16952	0.99999	Micos10	mitochondrial contact site and cristae organizing system subunit 10
12301	-0.46566	116.27	0.33908	-1.3733	0.16966	0.99999	Cacybp	calcyclin binding protein
18673	-0.47792	134.96	0.34805	-1.3731	0.16971	0.99999	Phb	prohibitin
59044	0.56321	63.018	0.41018	1.3731	0.16972	0.99999	Rnf130	ring finger protein 130
12729	-0.52136	80.534	0.37993	-1.3722	0.16999	0.99999	Clns1a	"chloride channel, nucleotide-sensitive, 1A"
94213	0.66424	59.113	0.48414	1.372	0.17006	0.99999	Ddx50	DEAD (Asp-Glu-Ala-Asp) box polypeptide 50
14181	-0.52028	107.82	0.37924	-1.3719	0.1701	0.99999	Fgfbp1	fibroblast growth factor binding protein 1
606496	-0.55667	65.018	0.40632	-1.3701	0.17067	0.99999	Gsk3a	glycogen synthase kinase 3 alpha
67003	-0.50303	85.958	0.36739	-1.3692	0.17094	0.99999	Uqcrc2	ubiquinol cytochrome c reductase core protein 2
18260	-1.0994	14.933	0.80368	-1.3679	0.17133	0.99999	Ocln	occludin
381694	1.1862	12.297	0.86851	1.3658	0.17201	0.99999	B3glct	beta-3-glucosyltransferase
11637	-0.43298	135.97	0.31713	-1.3653	0.17216	0.99999	Ak2	adenylate kinase 2
21928	0.54896	233.63	0.4021	1.3652	0.17218	0.99999	Tnfaip2	"tumor necrosis factor, alpha-induced protein 2"
69639	-0.49876	91.314	0.36619	-1.362	0.17319	0.99999	Exosc8	exosome component 8
20641	-0.40849	170.31	0.30011	-1.3611	0.17347	0.99999	Snrpd1	small nuclear ribonucleoprotein D1
69186	-0.50412	82.987	0.37108	-1.3585	0.1743	0.99999	Tmem256	transmembrane protein 256
17827	-0.50698	109.12	0.37372	-1.3566	0.17492	0.99999	Mtx1	metaxin 1
319448	0.6167	52.967	0.45558	1.3537	0.17585	0.99999	Fndc3a	fibronectin type III domain containing 3A
15254	-0.34398	561.67	0.25419	-1.3532	0.17599	0.99999	Hint1	histidine triad nucleotide binding protein 1
69654	0.41038	156.34	0.30439	1.3482	0.17759	0.99999	Dctn2	dynactin 2
100072	-0.80416	56.015	0.59653	-1.3481	0.17764	0.99999	Camta1	calmodulin binding transcription activator 1
231861	0.64488	47.319	0.47859	1.3475	0.17783	0.99999	Tnrc18	trinucleotide repeat containing 18
69833	-0.43528	182.98	0.32335	-1.3462	0.17825	0.99999	Polr2f	polymerase (RNA) II (DNA directed) polypeptide F
225348	0.42569	164.51	0.31784	1.3393	0.18046	0.99999	Wdr36	WD repeat domain 36
16898	-0.45508	268.62	0.34001	-1.3384	0.18076	0.99999	Rps2	ribosomal protein S2
67701	-0.38978	1257.6	0.29157	-1.3368	0.18128	0.99999	Wfdc2	WAP four-disulfide core domain 2
23825	-0.45769	198.63	0.34249	-1.3364	0.18143	0.99999	Banf1	BAF nuclear assembly factor 1
66121	-0.49091	95.113	0.36793	-1.3342	0.18212	0.99999	Chchd1	coiled-coil-helix-coiled-coil-helix domain containing 1
93692	0.62407	53.743	0.46794	1.3336	0.18232	0.99999	Glrx	glutaredoxin
68703	0.62602	45.025	0.46984	1.3324	0.18273	0.99999	Rere	arginine glutamic acid dipeptide (RE) repeats
76980	0.94358	17.53	0.70844	1.3319	0.18289	0.99999	Ube2ql1	ubiquitin-conjugating enzyme E2Q family-like 1
216190	0.84821	22.999	0.63817	1.3291	0.1838	0.99999	Appl2	"adaptor protein, phosphotyrosine interaction, PH domain and leucine zipper containing 2"
54384	-1.3189	8.744	0.99288	-1.3284	0.18406	0.99999	Mtmr7	myotubularin related protein 7
12034	-0.39267	244.44	0.29569	-1.328	0.18418	0.99999	Phb2	prohibitin 2
236900	-0.63622	42.254	0.47963	-1.3265	0.18467	0.99999	Pdk3	"pyruvate dehydrogenase kinase, isoenzyme 3"
213019	0.63431	79.8	0.47841	1.3259	0.18488	0.99999	Pdlim2	PDZ and LIM domain 2
20320	0.38044	326.05	0.28707	1.3252	0.18509	0.99999	Nptn	neuroplastin
110351	0.76478	28.297	0.57725	1.3249	0.18521	0.99999	Rap1gap	Rap1 GTPase-activating protein
17999	0.37016	294.51	0.2797	1.3234	0.18569	0.99999	Nedd4	"neural precursor cell expressed, developmentally down-regulated 4"
58804	-1.7595	5.4673	1.3319	-1.321	0.18649	0.99999	Cdc42ep5	CDC42 effector protein (Rho GTPase binding) 5
232910	-0.44613	111.27	0.33789	-1.3203	0.18673	0.99999	Ap2s1	"adaptor-related protein complex 2, sigma 1 subunit"
227613	-0.37248	498.8	0.28251	-1.3185	0.18735	0.99999	Tubb4b	"tubulin, beta 4B class IVB"
54353	0.47705	93.062	0.36222	1.317	0.18784	0.99999	Skap2	src family associated phosphoprotein 2
65963	0.47656	161.35	0.36199	1.3165	0.18801	0.99999	Tmem176b	transmembrane protein 176B
78754	3.0164	2.2607	2.2926	1.3157	0.18827	0.99999	Galnt15	polypeptide N-acetylgalactosaminyltransferase 15
66942	-0.51262	82.095	0.38989	-1.3148	0.18858	0.99999	Ddx18	DEAD (Asp-Glu-Ala-Asp) box polypeptide 18
20342	-0.93227	18.937	0.71086	-1.3115	0.1897	0.99999	Selenbp2	selenium binding protein 2
17153	-2.3124	2.9888	1.7635	-1.3113	0.18977	0.99999	Mal	"myelin and lymphocyte protein, T cell differentiation protein"
668139	0.76189	30.203	0.58152	1.3102	0.19014	0.99999	Gm8995	predicted gene 8995
66355	1.8132	4.5063	1.3853	1.3089	0.19057	0.99999	Gmpr	guanosine monophosphate reductase
21906	1.6828	5.2664	1.2864	1.3081	0.19082	0.99999	Otop1	otopetrin 1
14688	-0.37828	334.66	0.28931	-1.3075	0.19104	0.99999	Gnb1	"guanine nucleotide binding protein (G protein), beta 1"
15461	-0.6271	46.571	0.47985	-1.3069	0.19126	0.99999	Hras	Harvey rat sarcoma virus oncogene
106369	2.3328	3.0155	1.7854	1.3066	0.19135	0.99999	Ypel1	yippee like 1
68790	1.212	10.795	0.928	1.306	0.19155	0.99999	Fendrr	Foxf1 adjacent non-coding developmental regulatory RNA
246791	3.7678	1.2502	2.8904	1.3036	0.19238	0.99999	Obox3	oocyte specific homeobox 3
100039815	3.7678	1.2502	2.8904	1.3036	0.19238	0.99999	Gm2436	predicted gene 2436
26408	0.92004	17.998	0.70657	1.3021	0.19287	0.99999	Map3k5	mitogen-activated protein kinase kinase kinase 5
18617	-3.7631	1.252	2.8902	-1.302	0.19292	0.99999	Rhox5	reproductive homeobox 5
78943	0.85736	21.018	0.65911	1.3008	0.19334	0.99999	Ern1	endoplasmic reticulum (ER) to nucleus signalling 1
18102	-0.49335	150.4	0.3793	-1.3007	0.19336	0.99999	Nme1	NME/NM23 nucleoside diphosphate kinase 1
329252	0.68368	35.824	0.52692	1.2975	0.19446	0.99999	Lgr6	leucine-rich repeat-containing G protein-coupled receptor 6
244886	1.3975	7.2559	1.0789	1.2953	0.19522	0.99999	Tmem266	transmembrane protein 266
224792	2.0079	3.7462	1.5504	1.2951	0.19529	0.99999	Adgrf5	adhesion G protein-coupled receptor F5
27418	-0.50815	72.265	0.39236	-1.2951	0.19529	0.99999	Mkln1	"muskelin 1, intracellular mediator containing kelch motifs"
105171	1.3519	9.8136	1.0441	1.2948	0.19538	0.99999	Arrdc3	arrestin domain containing 3
75202	0.70864	33.581	0.54852	1.2919	0.19639	0.99999	Spaca6	sperm acrosome associated 6
74117	-0.42269	199.61	0.32728	-1.2915	0.19653	0.99999	Actr3	ARP3 actin-related protein 3
56330	-0.42053	136.99	0.32567	-1.2912	0.19662	0.99999	Pdcd5	programmed cell death 5
11777	0.57402	58.305	0.44524	1.2892	0.19732	0.99999	Ap3s1	"adaptor-related protein complex 3, sigma 1 subunit"
22271	0.58568	56.884	0.45451	1.2886	0.19753	0.99999	Upp1	uridine phosphorylase 1
17075	-0.39327	221.66	0.30584	-1.2859	0.19849	0.99999	Epcam	epithelial cell adhesion molecule
666377	-0.52098	137.42	0.40517	-1.2858	0.1985	0.99999	Gm8069	predicted pseudogene 8069
18717	0.54313	81.727	0.42336	1.2829	0.19952	0.99999	Pip5k1c	"phosphatidylinositol-4-phosphate 5-kinase, type 1 gamma"
19231	-0.26953	2985.2	0.21031	-1.2816	0.19998	0.99999	Ptma	prothymosin alpha
20973	-0.51005	75.332	0.39816	-1.281	0.20018	0.99999	Syngr2	synaptogyrin 2
56615	0.83806	29.778	0.65482	1.2798	0.2006	0.99999	Mgst1	microsomal glutathione S-transferase 1
66722	2.0058	3.7408	1.5684	1.2789	0.20092	0.99999	Spag16	sperm associated antigen 16
13345	3.7786	1.2608	2.9552	1.2786	0.20103	0.99999	Twist2	twist basic helix-loop-helix transcription factor 2
70729	3.7786	1.2608	2.9552	1.2786	0.20103	0.99999	Nos1ap	nitric oxide synthase 1 (neuronal) adaptor protein
73674	-0.52445	64.793	0.41052	-1.2775	0.20142	0.99999	Wdr75	WD repeat domain 75
11674	-0.27974	1513.1	0.21901	-1.2773	0.20149	0.99999	Aldoa	"aldolase A, fructose-bisphosphate"
18164	-0.8263	50.809	0.6471	-1.2769	0.20163	0.99999	Nptx1	neuronal pentraxin 1
73046	-0.61234	55.115	0.47981	-1.2762	0.20188	0.99999	Glrx5	glutaredoxin 5
19732	0.55672	62.39	0.43645	1.2756	0.20211	0.99999	Rgl2	ral guanine nucleotide dissociation stimulator-like 2
73474	-6.1139	6.3831	4.7933	-1.2755	0.20213	0.99999	Snhg9	small nucleolar RNA host gene 9
56460	-0.51626	65.721	0.40518	-1.2741	0.20261	0.99999	Pkp3	plakophilin 3
23996	-0.44459	108.78	0.34907	-1.2736	0.2028	0.99999	Psmc4	"proteasome (prosome, macropain) 26S subunit, ATPase, 4"
83925	0.7006	30.748	0.55023	1.2733	0.20292	0.99999	Trps1	transcriptional repressor GATA binding 1
18600	0.80285	23.293	0.63073	1.2729	0.20306	0.99999	Padi2	"peptidyl arginine deiminase, type II"
71310	0.64136	67.187	0.50499	1.2701	0.20406	0.99999	Tbc1d9	"TBC1 domain family, member 9"
18414	1.8235	4.5088	1.4366	1.2694	0.20431	0.99999	Osmr	oncostatin M receptor
77446	1.6939	5.2501	1.3346	1.2693	0.20435	0.99999	Heg1	heart development protein with EGF-like domains 1
27660	0.94096	16.727	0.74259	1.2671	0.20511	0.99999	1700088E04Rik	RIKEN cDNA 1700088E04 gene
66260	-0.77408	28.58	0.61096	-1.267	0.20516	0.99999	Tmem54	transmembrane protein 54
319554	-0.49541	107.44	0.39107	-1.2668	0.20523	0.99999	Idi1	isopentenyl-diphosphate delta isomerase
56207	-0.50227	71.996	0.39674	-1.266	0.20552	0.99999	Uchl5	ubiquitin carboxyl-terminal esterase L5
76448	0.46987	109.74	0.37128	1.2655	0.20568	0.99999	Ppp1r18	"protein phosphatase 1, regulatory subunit 18"
68981	-0.49424	93.347	0.39076	-1.2648	0.20594	0.99999	Snrpa1	small nuclear ribonucleoprotein polypeptide A'
211623	1.8163	4.4875	1.4362	1.2647	0.20598	0.99999	Plac9a	placenta specific 9a
27397	-0.49854	81.569	0.39453	-1.2636	0.20636	0.99999	Mrpl17	mitochondrial ribosomal protein L17
217149	-0.69765	31.53	0.55277	-1.2621	0.20692	0.99999	Cisd3	CDGSH iron sulfur domain 3
12428	-0.43851	150.04	0.34919	-1.2558	0.20919	0.99999	Ccna2	cyclin A2
22295	1.6892	5.2341	1.3457	1.2553	0.20936	0.99999	Cdh23	cadherin 23 (otocadherin)
66525	-0.55384	54.965	0.44242	-1.2518	0.21063	0.99999	Timm50	translocase of inner mitochondrial membrane 50
56459	-0.42858	168.32	0.34255	-1.2511	0.21088	0.99999	Sae1	SUMO1 activating enzyme subunit 1
23827	-0.60196	47.324	0.48119	-1.251	0.21094	0.99999	Bpnt1	bisphosphate 3'-nucleotidase 1
56086	-0.32454	501.75	0.25945	-1.2509	0.21098	0.99999	Set	SET nuclear oncogene
19981	-0.29518	987.17	0.23602	-1.2507	0.21106	0.99999	Rpl37a	ribosomal protein L37a
13032	-0.85598	19.694	0.68568	-1.2484	0.2119	0.99999	Ctsc	cathepsin C
207495	4.0476	1.5194	3.2482	1.2461	0.21273	0.99999	Baiap2l2	BAI1-associated protein 2-like 2
66503	4.0476	1.5194	3.2482	1.2461	0.21273	0.99999	1810034E14Rik	RIKEN cDNA 1810034E14 gene
19300	0.70892	28.244	0.57098	1.2416	0.2144	0.99999	Abcd4	"ATP-binding cassette, sub-family D (ALD), member 4"
246154	0.87346	19.711	0.70364	1.2414	0.21448	0.99999	Vasn	vasorin
244550	-1.0417	12.252	0.8394	-1.241	0.21462	0.99999	Podnl1	podocan-like 1
435921	-0.79192	23.925	0.63846	-1.2404	0.21484	0.99999	Clec2f	"C-type lectin domain family 2, member f"
11737	0.37677	185.1	0.30393	1.2397	0.2151	0.99999	Anp32a	"acidic (leucine-rich) nuclear phosphoprotein 32 family, member A"
234577	0.69626	28.775	0.56252	1.2378	0.2158	0.99999	Cpne2	copine II
67763	-0.4644	80.519	0.37559	-1.2365	0.21629	0.99999	Prpsap1	phosphoribosyl pyrophosphate synthetase-associated protein 1
26961	-0.27753	1775.5	0.22463	-1.2355	0.21666	0.99999	Rpl8	ribosomal protein L8
20442	0.79584	24.471	0.64426	1.2353	0.21673	0.99999	St3gal1	"ST3 beta-galactoside alpha-2,3-sialyltransferase 1"
94275	-0.3521	265.48	0.28507	-1.2351	0.21678	0.99999	Maged1	"melanoma antigen, family D, 1"
27060	0.44687	99.567	0.36269	1.2321	0.21792	0.99999	Tcirg1	"T cell, immune regulator 1, ATPase, H+ transporting, lysosomal V0 protein A3"
67951	-0.34989	267.16	0.28454	-1.2297	0.21882	0.99999	Tubb6	"tubulin, beta 6 class V"
11946	-0.30686	437.17	0.24965	-1.2292	0.21901	0.99999	Atp5a1	"ATP synthase, H+ transporting, mitochondrial F1 complex, alpha subunit 1"
110175	0.71304	28.993	0.58021	1.2289	0.2191	0.99999	Ggct	gamma-glutamyl cyclotransferase
12334	-0.42504	102.69	0.34588	-1.2289	0.21911	0.99999	Capn2	calpain 2
68026	-0.42907	122.91	0.34926	-1.2285	0.21925	0.99999	Pclaf	PCNA clamp associated factor
100042025	-0.33065	1240.6	0.2695	-1.2269	0.21986	0.99999	Gapdh-ps15	"glyceraldehyde-3-phosphate dehydrogenase, pseudogene 15"
16432	0.38641	207.73	0.315	1.2267	0.21994	0.99999	Itm2b	integral membrane protein 2B
76260	0.65106	39.87	0.53123	1.2256	0.22036	0.99999	Ttc8	tetratricopeptide repeat domain 8
216767	-0.55614	57.611	0.45379	-1.2256	0.22036	0.99999	Mrpl22	mitochondrial ribosomal protein L22
54485	0.75102	26.828	0.61346	1.2242	0.22086	0.99999	Dll4	delta like canonical Notch ligand 4
20024	-0.31839	411.84	0.26013	-1.224	0.22096	0.99999	Sub1	"SUB1 homolog, transcriptional regulator"
14621	-0.81135	20.713	0.66381	-1.2223	0.22161	0.99999	Gjb4	"gap junction protein, beta 4"
15945	-1.7674	9.8552	1.4476	-1.2209	0.22211	0.99999	Cxcl10	chemokine (C-X-C motif) ligand 10
21423	0.43611	106.43	0.35742	1.2202	0.2224	0.99999	Tcf3	transcription factor 3
215798	0.87078	19.703	0.71544	1.2171	0.22356	0.99999	Adgrg6	adhesion G protein-coupled receptor G6
241275	0.9688	14.036	0.79599	1.2171	0.22357	0.99999	Noxa1	NADPH oxidase activator 1
216233	1.1172	10.254	0.91859	1.2162	0.22392	0.99999	Socs2	suppressor of cytokine signaling 2
76816	0.47625	148.66	0.39171	1.2158	0.22406	0.99999	Sdccag8	serologically defined colon cancer antigen 8
26909	-0.78681	22.537	0.64748	-1.2152	0.22429	0.99999	Exo1	exonuclease 1
67941	-0.31773	368.76	0.26147	-1.2152	0.22431	0.99999	Rps27l	ribosomal protein S27-like
100303744	-1.9712	4.9654	1.6231	-1.2144	0.22458	0.99999	Sprr2a2	small proline-rich protein 2A2
20810	-0.49574	98.488	0.40823	-1.2144	0.2246	0.99999	Srm	spermidine synthase
19286	0.94453	17.583	0.77798	1.2141	0.22472	0.99999	Pts	6-pyruvoyl-tetrahydropterin synthase
235431	-0.95898	14	0.78991	-1.214	0.22473	0.99999	Coro2b	"coronin, actin binding protein, 2B"
14735	0.97055	13.985	0.79988	1.2134	0.22499	0.99999	Gpc4	glypican 4
56089	2.8192	2.0021	2.3242	1.213	0.22515	0.99999	Ramp3	receptor (calcitonin) activity modifying protein 3
16858	2.8192	2.0021	2.3242	1.213	0.22515	0.99999	Lgals7	"lectin, galactose binding, soluble 7"
94217	1.2914	7.7763	1.0649	1.2128	0.22522	0.99999	Lrp1b	low density lipoprotein-related protein 1B
13511	-1.0319	12.942	0.85118	-1.2123	0.2254	0.99999	Dsg2	desmoglein 2
19184	-0.39189	147.03	0.32381	-1.2103	0.22618	0.99999	Psmc5	"protease (prosome, macropain) 26S subunit, ATPase 5"
19934	-0.27072	1046.5	0.22441	-1.2064	0.22767	0.99999	Rpl22	ribosomal protein L22
70769	-0.40861	161.4	0.33876	-1.2062	0.22773	0.99999	Nolc1	nucleolar and coiled-body phosphoprotein 1
74238	1.5135	5.7758	1.2548	1.2062	0.22775	0.99999	Mterf2	mitochondrial transcription termination factor 2
67468	0.47493	69.773	0.39396	1.2055	0.22801	0.99999	Mmd	monocyte to macrophage differentiation-associated
18029	0.52221	66.413	0.43404	1.2031	0.22893	0.99999	Nfic	nuclear factor I/C
664968	-0.78952	34.932	0.65625	-1.2031	0.22895	0.99999	Tmem238	transmembrane protein 238
170750	-0.36907	158.93	0.30713	-1.2017	0.22949	0.99999	Xpnpep1	"X-prolyl aminopeptidase (aminopeptidase P) 1, soluble"
76130	-0.5152	61.393	0.42954	-1.1994	0.23036	0.99999	Las1l	LAS1-like (S. cerevisiae)
104445	0.41556	137.86	0.34651	1.1993	0.23041	0.99999	Cdc42ep1	CDC42 effector protein (Rho GTPase binding) 1
623279	0.74781	30.092	0.62385	1.1987	0.23064	0.99999	Dok6	docking protein 6
63959	0.48526	97.273	0.40488	1.1985	0.23071	0.99999	Slc29a1	"solute carrier family 29 (nucleoside transporters), member 1"
26446	-0.37089	289.78	0.30965	-1.1978	0.231	0.99999	Psmb3	"proteasome (prosome, macropain) subunit, beta type 3"
18817	-0.45755	101.19	0.38206	-1.1976	0.23108	0.99999	Plk1	polo like kinase 1
11421	2.1799	2.7623	1.8205	1.1974	0.23115	0.99999	Ace	angiotensin I converting enzyme (peptidyl-dipeptidase A) 1
547347	0.35763	409.15	0.29914	1.1955	0.23189	0.99999	Gm6034	predicted gene 6034
19041	0.75972	27.595	0.63614	1.1943	0.23237	0.99999	Ppl	periplakin
74670	1.588	7.9408	1.33	1.1939	0.23251	0.99999	Zfp943	zinc finger prtoein 943
19240	-0.35004	1575.4	0.29346	-1.1928	0.23295	0.99999	Tmsb10	"thymosin, beta 10"
22070	0.26759	3580	0.22437	1.1926	0.23301	0.99999	Tpt1	"tumor protein, translationally-controlled 1"
67872	-0.53735	55.337	0.45061	-1.1925	0.23308	0.99999	Nsmce4a	"NSE4 homolog A, SMC5-SMC6 complex component"
15199	2.1716	2.7463	1.8212	1.1924	0.23311	0.99999	Hebp1	heme binding protein 1
73379	0.49927	60.762	0.41876	1.1923	0.23315	0.99999	Dcbld2	"discoidin, CUB and LCCL domain containing 2"
50768	1.8834	3.4983	1.5807	1.1915	0.23345	0.99999	Dlc1	deleted in liver cancer 1
20250	-0.39489	762.17	0.33152	-1.1911	0.2336	0.99999	Scd2	stearoyl-Coenzyme A desaturase 2
17345	-0.40924	112.48	0.34361	-1.191	0.23366	0.99999	Mki67	antigen identified by monoclonal antibody Ki 67
17748	-0.41844	523.51	0.35134	-1.191	0.23367	0.99999	Mt1	metallothionein 1
252972	0.7357	33.4	0.61777	1.1909	0.2337	0.99999	Tpcn1	two pore channel 1
69540	-0.81501	22.823	0.68463	-1.1904	0.23387	0.99999	Klk10	kallikrein related-peptidase 10
71361	0.81695	19.244	0.68646	1.1901	0.23402	0.99999	Aifm2	"apoptosis-inducing factor, mitochondrion-associated 2"
320508	0.35827	368.67	0.30121	1.1894	0.23427	0.99999	Cachd1	cache domain containing 1
66154	-0.49204	65.653	0.41399	-1.1885	0.23463	0.99999	Tmem14c	transmembrane protein 14C
67186	-0.30432	976.94	0.25611	-1.1882	0.23474	0.99999	Rplp2	"ribosomal protein, large P2"
208922	-1.3202	10.435	1.113	-1.1861	0.23558	0.99999	Cpeb3	cytoplasmic polyadenylation element binding protein 3
93842	-0.79747	21.919	0.67326	-1.1845	0.23622	0.99999	Igsf9	"immunoglobulin superfamily, member 9"
12822	0.4248	130.06	0.35867	1.1844	0.23627	0.99999	Col18a1	"collagen, type XVIII, alpha 1"
15361	0.30089	739.28	0.25418	1.1838	0.23649	0.99999	Hmga1	high mobility group AT-hook 1
56372	-0.39529	121.83	0.33399	-1.1836	0.23659	0.99999	1110004F10Rik	RIKEN cDNA 1110004F10 gene
22282	-0.491	76.647	0.41486	-1.1835	0.2366	0.99999	Usf2	upstream transcription factor 2
79565	1.2784	8.5332	1.0818	1.1817	0.23732	0.99999	Mettl27	methyltransferase like 27
21351	-0.40642	124.55	0.34399	-1.1815	0.23741	0.99999	Taldo1	transaldolase 1
27801	0.62857	40.121	0.53204	1.1814	0.23743	0.99999	Zdhhc8	"zinc finger, DHHC domain containing 8"
11927	-0.38687	130.04	0.32746	-1.1814	0.23744	0.99999	Atox1	antioxidant 1 copper chaperone
233876	-0.49479	101.99	0.4189	-1.1812	0.23754	0.99999	Hirip3	HIRA interacting protein 3
13036	0.41533	136.14	0.35169	1.181	0.23762	0.99999	Ctsh	cathepsin H
67236	-0.44494	102.43	0.37683	-1.1808	0.2377	0.99999	Cinp	cyclin-dependent kinase 2 interacting protein
70247	-0.39444	149.72	0.3346	-1.1789	0.23845	0.99999	Psmd1	"proteasome (prosome, macropain) 26S subunit, non-ATPase, 1"
56209	-0.64928	31.524	0.55117	-1.178	0.2388	0.99999	Gde1	glycerophosphodiester phosphodiesterase 1
80888	0.51549	81.564	0.43841	1.1758	0.23967	0.99999	Hspb8	heat shock protein 8
14869	-1.9886	3.7628	1.6935	-1.1742	0.2403	0.99999	Gstp2	"glutathione S-transferase, pi 2"
19921	-0.30202	2334.1	0.25751	-1.1729	0.24085	0.99999	Rpl19	ribosomal protein L19
80294	0.57551	39.756	0.49087	1.1724	0.24102	0.99999	Pofut2	protein O-fucosyltransferase 2
224617	1.4516	6.5412	1.2392	1.1714	0.24146	0.99999	Tbc1d24	"TBC1 domain family, member 24"
22123	-0.36764	177.96	0.31438	-1.1694	0.24225	0.99999	Psmd3	"proteasome (prosome, macropain) 26S subunit, non-ATPase, 3"
237928	0.78498	21.007	0.67136	1.1692	0.24231	0.99999	Phospho1	"phosphatase, orphan 1"
108802	1.369	6.272	1.1713	1.1689	0.24246	0.99999	Calr4	calreticulin 4
17760	-1.1024	10.216	0.94533	-1.1662	0.24355	0.99999	Map6	microtubule-associated protein 6
226982	-0.50077	56.264	0.42943	-1.1661	0.24356	0.99999	Eif5b	eukaryotic translation initiation factor 5B
16449	-1.1727	8.9564	1.0059	-1.1658	0.24369	0.99999	Jag1	jagged 1
11545	-0.4951	62.833	0.42529	-1.1641	0.24436	0.99999	Parp1	"poly (ADP-ribose) polymerase family, member 1"
21849	-0.3071	339.23	0.26389	-1.1637	0.24454	0.99999	Trim28	tripartite motif-containing 28
26442	-0.36325	166.14	0.31231	-1.1631	0.24479	0.99999	Psma5	proteasome subunit alpha 5
234686	0.62105	39.369	0.53426	1.1625	0.24505	0.99999	Fhod1	formin homology 2 domain containing 1
110611	-0.31775	248.65	0.2737	-1.1609	0.24568	0.99999	Hdlbp	high density lipoprotein (HDL) binding protein
67308	-0.7018	25.025	0.60516	-1.1597	0.24617	0.99999	Mrpl46	mitochondrial ribosomal protein L46
22352	0.37184	3658.9	0.32085	1.1589	0.24649	0.99999	Vim	vimentin
23997	-0.43498	92.617	0.37552	-1.1583	0.24673	0.99999	Psmd13	"proteasome (prosome, macropain) 26S subunit, non-ATPase, 13"
15182	0.35895	147.56	0.31004	1.1577	0.24697	0.99999	Hdac2	histone deacetylase 2
22051	0.416	90.306	0.35975	1.1564	0.24753	0.99999	Trip6	thyroid hormone receptor interactor 6
66882	-0.34019	198.07	0.29421	-1.1563	0.24757	0.99999	Bzw1	basic leucine zipper and W2 domains 1
226255	0.3475	292.4	0.3006	1.156	0.24767	0.99999	Atrnl1	attractin like 1
11677	-0.38863	129.13	0.33622	-1.1559	0.24772	0.99999	Akr1b3	"aldo-keto reductase family 1, member B3 (aldose reductase)"
14115	-0.33086	230.8	0.28628	-1.1557	0.2478	0.99999	Fbln2	fibulin 2
14234	0.91317	17.335	0.79033	1.1554	0.24791	0.99999	Foxc2	forkhead box C2
66257	0.82444	17.263	0.71406	1.1546	0.24826	0.99999	Nicn1	nicolin 1
12237	-0.42607	99.89	0.36924	-1.1539	0.24853	0.99999	Bub3	BUB3 mitotic checkpoint protein
223696	-0.41259	116.61	0.35756	-1.1539	0.24854	0.99999	Tomm22	translocase of outer mitochondrial membrane 22
66165	-0.53516	50.287	0.46382	-1.1538	0.24857	0.99999	Bccip	BRCA2 and CDKN1A interacting protein
22166	-0.3419	414.52	0.29635	-1.1537	0.24861	0.99999	Txn1	thioredoxin 1
17706	0.30353	31540	0.26314	1.1535	0.24872	0.99999	mt-Atp8	"ATP synthase 8, mitochondrial"
19142	0.90316	19.19	0.78314	1.1533	0.2488	0.99999	Prss12	"protease, serine 12 neurotrypsin (motopsin)"
69553	1.4193	5.5013	1.2323	1.1518	0.24942	0.99999	Ripor3	RIPOR family member 3
103236	0.36808	186.1	0.31969	1.1514	0.24958	0.99999	Csnk1g2	"casein kinase 1, gamma 2"
66419	-0.55451	44.559	0.48258	-1.149	0.25054	0.99999	Mrpl11	mitochondrial ribosomal protein L11
17719	0.25307	1769.3	0.2203	1.1488	0.25065	0.99999	mt-Nd4	"NADH dehydrogenase 4, mitochondrial"
19060	-0.54026	49.831	0.47079	-1.1475	0.25116	0.99999	Ppp5c	"protein phosphatase 5, catalytic subunit"
16801	-0.40214	136.24	0.35062	-1.1469	0.25141	0.99999	Arhgef1	Rho guanine nucleotide exchange factor (GEF) 1
66046	-0.39838	100.5	0.34742	-1.1467	0.25151	0.99999	Ndufb5	NADH:ubiquinone oxidoreductase subunit B5
66292	-0.38971	131.4	0.34067	-1.144	0.25264	0.99999	Mrps21	mitochondrial ribosomal protein S21
103135	0.84279	16.009	0.73799	1.142	0.25345	0.99999	Pan2	PAN2 poly(A) specific ribonuclease subunit
69749	0.50035	54.745	0.43821	1.1418	0.25353	0.99999	Epb41l4aos	"erythrocyte membrane protein band 4.1 like 4a, opposite strand"
66084	0.73543	21.267	0.64474	1.1407	0.25401	0.99999	Rmnd1	required for meiotic nuclear division 1 homolog
67273	-0.46387	73.349	0.40669	-1.1406	0.25404	0.99999	Ndufa10	NADH:ubiquinone oxidoreductase subunit A10
69071	-0.50454	88.498	0.44271	-1.1397	0.25443	0.99999	Tmem97	transmembrane protein 97
18221	-0.31309	238.69	0.27504	-1.1383	0.25498	0.99999	Nudc	nudC nuclear distribution protein
18208	0.92654	13.014	0.81413	1.1381	0.25509	0.99999	Ntn1	netrin 1
64009	0.58545	53.374	0.51448	1.138	0.25514	0.99999	Syne1	"spectrin repeat containing, nuclear envelope 1"
19177	-0.33942	192.31	0.29828	-1.1379	0.25515	0.99999	Psmb7	"proteasome (prosome, macropain) subunit, beta type 7"
77128	1.3761	6.2745	1.2119	1.1355	0.25619	0.99999	Crebrf	CREB3 regulatory factor
14356	-0.70542	25.02	0.62147	-1.1351	0.25634	0.99999	Timm10b	translocase of inner mitochondrial membrane 10B
54153	0.54416	43.479	0.47968	1.1344	0.25662	0.99999	Rasa4	RAS p21 protein activator 4
330814	0.63879	32.581	0.56332	1.134	0.2568	0.99999	Adgrl1	adhesion G protein-coupled receptor L1
52276	-0.40152	96.484	0.35413	-1.1338	0.25687	0.99999	Cdca8	cell division cycle associated 8
16404	0.84364	15.996	0.74452	1.1331	0.25716	0.99999	Itga7	integrin alpha 7
69072	-0.3938	102.02	0.34768	-1.1326	0.25737	0.99999	Ebna1bp2	EBNA1 binding protein 2
229487	-1.2111	7.4786	1.0706	-1.1313	0.25795	0.99999	Gatb	"glutamyl-tRNA(Gln) amidotransferase, subunit B"
16777	0.36309	204.24	0.32117	1.1305	0.25826	0.99999	Lamb1	laminin B1
16997	0.65511	30.78	0.57957	1.1303	0.25834	0.99999	Ltbp2	latent transforming growth factor beta binding protein 2
13605	-0.43546	77.166	0.38533	-1.1301	0.25843	0.99999	Ect2	ect2 oncogene
72544	-0.74146	22.806	0.65619	-1.1299	0.2585	0.99999	Exosc6	exosome component 6
328059	-1.1287	19.045	0.99918	-1.1297	0.25862	0.99999	Slc7a15	"solute carrier family 7 (cationic amino acid transporter, y+ system), member 15"
11981	0.63282	29.284	0.56072	1.1286	0.25907	0.99999	Atp9a	"ATPase, class II, type 9A"
19845	-5.4135	3.928	4.7986	-1.1281	0.25926	0.99999	Rnu1b2	U1b2 small nuclear RNA
21877	-0.45815	172.84	0.40611	-1.1281	0.25926	0.99999	Tk1	thymidine kinase 1
16952	-0.40194	556.74	0.35637	-1.1279	0.25938	0.99999	Anxa1	annexin A1
20624	-0.41491	113.43	0.36799	-1.1275	0.25953	0.99999	Eftud2	elongation factor Tu GTP binding domain containing 2
216825	0.49137	61.674	0.4361	1.1267	0.25985	0.99999	Usp22	ubiquitin specific peptidase 22
353242	-0.45389	74.854	0.40305	-1.1261	0.2601	0.99999	Mrpl21	mitochondrial ribosomal protein L21
21406	0.50346	51.316	0.4475	1.125	0.26057	0.99999	Tcf12	transcription factor 12
77583	2.193	2.7541	1.9495	1.1249	0.26062	0.99999	Notum	notum palmitoleoyl-protein carboxylesterase
67710	-0.40438	90.246	0.35955	-1.1247	0.26072	0.99999	Polr2g	polymerase (RNA) II (DNA directed) polypeptide G
110208	-0.3492	162.25	0.31075	-1.1237	0.26113	0.99999	Pgd	phosphogluconate dehydrogenase
407785	-0.41428	94.017	0.36878	-1.1234	0.26128	0.99999	Ndufs6	NADH:ubiquinone oxidoreductase core subunit S6
21356	0.47465	89.677	0.42253	1.1234	0.26129	0.99999	Tapbp	TAP binding protein
22143	-0.38152	1158.8	0.33973	-1.123	0.26143	0.99999	Tuba1b	"tubulin, alpha 1B"
13052	0.50346	60.156	0.44873	1.122	0.26187	0.99999	Cxadr	coxsackie virus and adenovirus receptor
74204	-0.47035	64.577	0.41957	-1.121	0.26227	0.99999	Xpo6	exportin 6
104112	-0.37869	167.8	0.33802	-1.1203	0.26258	0.99999	Acly	ATP citrate lyase
74325	-0.55178	40.738	0.49261	-1.1201	0.26266	0.99999	Cltb	"clathrin, light polypeptide (Lcb)"
75785	1.0659	10.774	0.95197	1.1197	0.26285	0.99999	Klhl24	kelch-like 24
69367	-0.6463	26.983	0.57792	-1.1183	0.26343	0.99999	Glrx2	glutaredoxin 2 (thioltransferase)
26943	0.50676	54.262	0.45333	1.1179	0.26363	0.99999	Serinc3	serine incorporator 3
15275	0.38321	107.98	0.34333	1.1162	0.26436	0.99999	Hk1	hexokinase 1
59093	0.88933	13.497	0.79709	1.1157	0.26454	0.99999	Pcbp3	poly(rC) binding protein 3
66988	-0.43265	76.463	0.38791	-1.1153	0.26471	0.99999	Lap3	leucine aminopeptidase 3
20197	0.64546	30.041	0.57973	1.1134	0.26554	0.99999	S100a3	S100 calcium binding protein A3
67671	-0.27911	1716.1	0.25084	-1.1127	0.26584	0.99999	Rpl38	ribosomal protein L38
22218	-0.36065	124.73	0.32434	-1.112	0.26616	0.99999	Sumo1	small ubiquitin-like modifier 1
20042	0.38262	181.19	0.34415	1.1118	0.26622	0.99999	Rps12	ribosomal protein S12
16913	0.6728	41.131	0.60551	1.1111	0.26651	0.99999	Psmb8	"proteasome (prosome, macropain) subunit, beta type 8 (large multifunctional peptidase 7)"
106393	-1.4806	4.7578	1.3328	-1.1109	0.26663	0.99999	Srl	sarcalumenin
66583	-0.59825	41.626	0.53871	-1.1105	0.26677	0.99999	Exosc1	exosome component 1
22146	-0.28857	403.83	0.25987	-1.1104	0.26681	0.99999	Tuba1c	"tubulin, alpha 1C"
56451	-0.4448	68.015	0.40064	-1.1102	0.26691	0.99999	Suclg1	"succinate-CoA ligase, GDP-forming, alpha subunit"
108989	-0.37243	142.95	0.33554	-1.1099	0.26703	0.99999	Tpr	"translocated promoter region, nuclear basket protein"
226352	-0.88033	14.207	0.79474	-1.1077	0.268	0.99999	Epb41l5	erythrocyte membrane protein band 4.1 like 5
170930	-0.35375	387.61	0.31947	-1.1073	0.26817	0.99999	Sumo2	small ubiquitin-like modifier 2
66229	-0.41946	99.674	0.37897	-1.1068	0.26837	0.99999	Rpl7l1	ribosomal protein L7-like 1
66445	-0.40035	95.26	0.3618	-1.1065	0.26849	0.99999	Cyc1	cytochrome c-1
18087	0.57018	90.641	0.51545	1.1062	0.26864	0.99999	Nktr	natural killer tumor recognition sequence
20224	0.36658	130.67	0.33163	1.1054	0.26899	0.99999	Sar1a	secretion associated Ras related GTPase 1A
12315	-0.37196	153	0.33756	-1.1019	0.27049	0.99999	Calm3	calmodulin 3
110385	3.4485	1.0023	3.1297	1.1019	0.27051	0.99999	Pde4c	"phosphodiesterase 4C, cAMP specific"
79201	-0.67689	24.782	0.61548	-1.0998	0.27143	0.99999	Tnfrsf23	"tumor necrosis factor receptor superfamily, member 23"
14933	-0.81029	17.203	0.73687	-1.0996	0.27148	0.99999	Gk	glycerol kinase
16438	0.66385	24.526	0.60378	1.0995	0.27156	0.99999	Itpr1	"inositol 1,4,5-trisphosphate receptor 1"
69719	-0.46741	65.095	0.42547	-1.0986	0.27196	0.99999	Cad	"carbamoyl-phosphate synthetase 2, aspartate transcarbamylase, and dihydroorotase"
66091	-0.49691	52.546	0.45239	-1.0984	0.27203	0.99999	Ndufa3	NADH:ubiquinone oxidoreductase subunit A3
76808	0.23719	3994.8	0.21605	1.0978	0.27227	0.99999	Rpl18a	ribosomal protein L18A
12766	1.0564	10.044	0.96246	1.0976	0.27239	0.99999	Cxcr3	chemokine (C-X-C motif) receptor 3
64292	1.0714	9.2508	0.97631	1.0974	0.27246	0.99999	Ptges	prostaglandin E synthase
330908	1.3781	6.2316	1.2559	1.0973	0.2725	0.99999	Opcml	opioid binding protein/cell adhesion molecule-like
67923	-0.45003	170.17	0.41028	-1.0969	0.2727	0.99999	Eloc	elongin C
70316	-0.38633	126.37	0.35224	-1.0968	0.27274	0.99999	Ndufab1	NADH:ubiquinone oxidoreductase subunit AB1
12804	-3.437	0.99832	3.1339	-1.0967	0.27276	0.99999	Cntfr	ciliary neurotrophic factor receptor
100561	0.81049	21.344	0.73925	1.0964	0.27292	0.99999	Slc15a4	"solute carrier family 15, member 4"
380629	0.78847	18.964	0.71934	1.0961	0.27304	0.99999	Heca	"hdc homolog, cell cycle regulator"
75590	-0.56739	38.557	0.51785	-1.0957	0.27322	0.99999	Dusp9	dual specificity phosphatase 9
18024	0.48304	65.906	0.44093	1.0955	0.2733	0.99999	Nfe2l2	"nuclear factor, erythroid derived 2, like 2"
13041	-1.5793	3.9972	1.4417	-1.0954	0.27334	0.99999	Ctsw	cathepsin W
66422	-0.45677	92.241	0.41744	-1.0942	0.27386	0.99999	Dctpp1	dCTP pyrophosphatase 1
20397	0.42613	72.508	0.38975	1.0933	0.27425	0.99999	Sgpl1	sphingosine phosphate lyase 1
52502	0.42971	92.856	0.39323	1.0928	0.27449	0.99999	Carhsp1	calcium regulated heat stable protein 1
19943	-0.2672	574.26	0.24457	-1.0925	0.27459	0.99999	Rpl28	ribosomal protein L28
100042856	0.75237	18.738	0.68875	1.0924	0.27467	0.99999	Gm4070	predicted gene 4070
18023	0.41434	144.95	0.37937	1.0922	0.27476	0.99999	Nfe2l1	"nuclear factor, erythroid derived 2,-like 1"
20005	-0.25738	1361.1	0.2359	-1.091	0.27525	0.99999	Rpl9	ribosomal protein L9
18772	-1.1152	8.7595	1.0226	-1.0905	0.27551	0.99999	Pkp1	plakophilin 1
19172	-0.29865	257.41	0.27418	-1.0893	0.27604	0.99999	Psmb4	"proteasome (prosome, macropain) subunit, beta type 4"
20787	0.42889	72.084	0.39387	1.0889	0.27619	0.99999	Srebf1	sterol regulatory element binding transcription factor 1
20020	-0.45314	76.655	0.41626	-1.0886	0.27633	0.99999	Polr2a	polymerase (RNA) II (DNA directed) polypeptide A
66078	-0.32334	171.99	0.29716	-1.0881	0.27655	0.99999	Tsen34	tRNA splicing endonuclease subunit 34
18655	-0.27729	927.22	0.25526	-1.0863	0.27734	0.99999	Pgk1	phosphoglycerate kinase 1
54393	0.95583	10.993	0.88111	1.0848	0.27801	0.99999	Gabbr1	"gamma-aminobutyric acid (GABA) B receptor, 1"
17722	0.24292	1004.5	0.22397	1.0846	0.27809	0.99999	mt-Nd6	"NADH dehydrogenase 6, mitochondrial"
22209	-0.50782	49.827	0.46822	-1.0846	0.27811	0.99999	Ube2a	ubiquitin-conjugating enzyme E2A
104885	0.99996	10.497	0.9232	1.0831	0.27874	0.99999	Tmem179	transmembrane protein 179
74703	-0.69118	22.256	0.63824	-1.083	0.27883	0.99999	Ccdc7a	coiled-coil domain containing 7A
224656	0.77154	20.331	0.7125	1.0829	0.27887	0.99999	Zfp523	zinc finger protein 523
544963	2.0059	2.5037	1.8529	1.0826	0.279	0.99999	Iqgap2	IQ motif containing GTPase activating protein 2
18247	0.40515	83.984	0.37429	1.0825	0.27905	0.99999	Oaz2	ornithine decarboxylase antizyme 2
55949	-0.24896	1369.8	0.23029	-1.0811	0.27966	0.99999	Eef1b2	eukaryotic translation elongation factor 1 beta 2
19387	-0.39972	85.937	0.36985	-1.0808	0.2798	0.99999	Rangap1	RAN GTPase activating protein 1
77889	0.72854	23.227	0.67418	1.0806	0.27986	0.99999	Lbh	limb-bud and heart
64652	0.32548	170.74	0.30132	1.0802	0.28006	0.99999	Nisch	nischarin
21924	1.7471	3.2503	1.6176	1.0801	0.28012	0.99999	Tnnc1	"troponin C, cardiac/slow skeletal"
14421	0.51353	50.372	0.47585	1.0792	0.28051	0.99999	B4galnt1	"beta-1,4-N-acetyl-galactosaminyl transferase 1"
15227	1.2917	6.0159	1.1975	1.0786	0.28075	0.99999	Foxf1	forkhead box F1
271849	2.0089	2.509	1.8637	1.0779	0.28106	0.99999	Shc4	"SHC (Src homology 2 domain containing) family, member 4"
319565	0.56241	37.005	0.52176	1.0779	0.28107	0.99999	Syne2	"spectrin repeat containing, nuclear envelope 2"
14208	-0.33595	181.46	0.31174	-1.0777	0.28118	0.99999	Ppm1g	"protein phosphatase 1G (formerly 2C), magnesium-dependent, gamma isoform"
67776	0.76038	22.711	0.70635	1.0765	0.28171	0.99999	Vwa5a	von Willebrand factor A domain containing 5A
71704	-1.0356	11.421	0.9621	-1.0764	0.28173	0.99999	Arhgef3	Rho guanine nucleotide exchange factor (GEF) 3
67067	-0.41231	79.925	0.38312	-1.0762	0.28184	0.99999	Romo1	reactive oxygen species modulator 1
12837	0.41474	83.671	0.38583	1.0749	0.2824	0.99999	Col8a1	"collagen, type VIII, alpha 1"
69146	0.8821	12.775	0.82096	1.0745	0.28261	0.99999	Gsdmd	gasdermin D
13506	-3.4266	0.99017	3.1905	-1.074	0.28282	0.99999	Dsc2	desmocollin 2
216961	1.0668	9.968	0.99333	1.0739	0.28285	0.99999	Coro6	coronin 6
69038	-0.36524	119.87	0.3404	-1.073	0.28329	0.99999	Tmem258	transmembrane protein 258
215615	-0.42017	73.283	0.39198	-1.0719	0.28375	0.99999	Rnpep	arginyl aminopeptidase (aminopeptidase B)
50908	1.9009	3.5061	1.7769	1.0698	0.28473	0.99999	C1s1	"complement component 1, s subcomponent 1"
77041	2.5995	1.7542	2.4313	1.0692	0.285	0.99999	Arsk	arylsulfatase K
68235	2.5995	1.7542	2.4313	1.0692	0.285	0.99999	Mturn	"maturin, neural progenitor differentiation regulator homolog (Xenopus)"
26457	0.39214	99.909	0.36689	1.0688	0.28515	0.99999	Slc27a1	"solute carrier family 27 (fatty acid transporter), member 1"
110033	-0.44099	66.82	0.41278	-1.0683	0.28537	0.99999	Kif22	kinesin family member 22
11639	-0.69689	21.021	0.65263	-1.0678	0.2856	0.99999	Ak4	adenylate kinase 4
68278	-0.3478	178.26	0.3258	-1.0675	0.28574	0.99999	Ddx39	DEAD (Asp-Glu-Ala-Asp) box polypeptide 39
18005	-0.47038	51.973	0.44074	-1.0673	0.28585	0.99999	Nek2	NIMA (never in mitosis gene a)-related expressed kinase 2
71750	0.48775	48.486	0.45705	1.0672	0.28589	0.99999	R3hdm2	R3H domain containing 2
67530	-0.32533	237.34	0.30489	-1.0671	0.28594	0.99999	Uqcrb	ubiquinol-cytochrome c reductase binding protein
11752	-1.9895	2.4896	1.8656	-1.0664	0.28623	0.99999	Anxa8	annexin A8
71306	-1.9895	2.4896	1.8656	-1.0664	0.28623	0.99999	Mfap3l	microfibrillar-associated protein 3-like
83554	0.75426	18.717	0.70731	1.0664	0.28625	0.99999	Fstl3	follistatin-like 3
67488	0.8493	16.001	0.79661	1.0661	0.28636	0.99999	Calcoco1	calcium binding and coiled coil domain 1
30930	0.41024	75.565	0.38493	1.0658	0.28654	0.99999	Vps26a	VPS26 retromer complex component A
71679	-0.30817	289.11	0.28941	-1.0648	0.28696	0.99999	Atp5h	"ATP synthase, H+ transporting, mitochondrial F0 complex, subunit D"
13014	0.29537	292.62	0.27741	1.0648	0.28698	0.99999	Cstb	cystatin B
223272	0.65018	33.357	0.61077	1.0645	0.28709	0.99999	Itgbl1	"integrin, beta-like 1"
234356	0.77611	16.263	0.72925	1.0643	0.28721	0.99999	Csgalnact1	chondroitin sulfate N-acetylgalactosaminyltransferase 1
54125	0.65695	23.771	0.61797	1.0631	0.28775	0.99999	Polm	"polymerase (DNA directed), mu"
17385	0.71535	19.784	0.67302	1.0629	0.28783	0.99999	Mmp11	matrix metallopeptidase 11
14824	0.36831	164.09	0.34652	1.0629	0.28784	0.99999	Grn	granulin
18103	-0.27627	469.81	0.2602	-1.0617	0.28835	0.99999	Nme2	NME/NM23 nucleoside diphosphate kinase 2
330406	-0.94418	10.968	0.8895	-1.0615	0.28848	0.99999	B4galnt3	"beta-1,4-N-acetyl-galactosaminyl transferase 3"
18150	-0.38646	116.05	0.36441	-1.0605	0.28891	0.99999	Npm3	nucleoplasmin 3
231670	0.77849	16.285	0.7344	1.06	0.28913	0.99999	Fbxo21	F-box protein 21
21915	-0.41372	115.28	0.3903	-1.06	0.28915	0.99999	Dtymk	deoxythymidylate kinase
17215	-0.36161	140.97	0.34121	-1.0598	0.28924	0.99999	Mcm3	minichromosome maintenance complex component 3
67287	0.69695	20.272	0.6588	1.0579	0.2901	0.99999	Parp6	"poly (ADP-ribose) polymerase family, member 6"
19344	0.48524	53.357	0.45873	1.0578	0.29015	0.99999	Rab5b	"RAB5B, member RAS oncogene family"
20310	-2.5756	1.7372	2.4363	-1.0571	0.29044	0.99999	Cxcl2	chemokine (C-X-C motif) ligand 2
71026	-4.5922	6.341	4.3445	-1.057	0.29051	0.99999	Speer3	spermatogenesis associated glutamate (E)-rich protein 3
229363	-0.39782	81.259	0.37662	-1.0563	0.29084	0.99999	Gmps	guanine monophosphate synthetase
12181	-0.49307	59.136	0.46693	-1.056	0.29097	0.99999	Bop1	block of proliferation 1
18764	0.65201	25.06	0.6175	1.0559	0.29102	0.99999	Pkd2	"polycystin 2, transient receptor potential cation channel"
103213	0.6369	25.484	0.60339	1.0555	0.29118	0.99999	Traf3ip2	TRAF3 interacting protein 2
71874	-2.5682	1.7426	2.4346	-1.0549	0.29149	0.99999	Mab21l4	mab-21-like 4
22129	0.44772	57.749	0.42458	1.0545	0.29166	0.99999	Ttc3	tetratricopeptide repeat domain 3
56462	0.32289	206.31	0.30633	1.0541	0.29184	0.99999	Mtch1	mitochondrial carrier 1
11758	-0.32132	223.31	0.30503	-1.0534	0.29216	0.99999	Prdx6	peroxiredoxin 6
100043813	-0.90929	13.672	0.86332	-1.0532	0.29223	0.99999	Rps27rt	"ribosomal protein S27, retrogene"
105445	0.42553	66.004	0.40422	1.0527	0.29247	0.99999	Dock9	dedicator of cytokinesis 9
66235	-0.32948	161.1	0.31302	-1.0526	0.29252	0.99999	Eif1ax	"eukaryotic translation initiation factor 1A, X-linked"
229524	-0.55866	48.421	0.53076	-1.0526	0.29254	0.99999	Msto1	"misato 1, mitochondrial distribution and morphology regulator"
217708	-0.85865	14.782	0.81598	-1.0523	0.29267	0.99999	Lin52	lin-52 homolog (C. elegans)
12340	-0.33644	138.25	0.31975	-1.0522	0.29271	0.99999	Capza1	"capping protein (actin filament) muscle Z-line, alpha 1"
15040	0.66578	26.989	0.63285	1.052	0.29279	0.99999	H2-T23	"histocompatibility 2, T region locus 23"
244216	-0.73231	27.389	0.69641	-1.0516	0.293	0.99999	Zfp771	zinc finger protein 771
73744	0.54012	35.505	0.51365	1.0515	0.29302	0.99999	Man2c1	"mannosidase, alpha, class 2C, member 1"
57278	-1.5774	3.9756	1.5004	-1.0514	0.2931	0.99999	Bcam	basal cell adhesion molecule
22171	-0.44834	79.435	0.42665	-1.0508	0.29334	0.99999	Tyms	thymidylate synthase
67264	-0.38186	181.47	0.36348	-1.0506	0.29346	0.99999	Ndufb8	NADH:ubiquinone oxidoreductase subunit B8
54636	0.65165	27.456	0.62085	1.0496	0.2939	0.99999	Wdr45	WD repeat domain 45
26417	0.37854	110.07	0.36071	1.0494	0.29399	0.99999	Mapk3	mitogen-activated protein kinase 3
20873	-0.48727	47.535	0.46447	-1.0491	0.29414	0.99999	Plk4	polo like kinase 4
93672	-0.47322	56.801	0.45163	-1.0478	0.29473	0.99999	Il24	interleukin 24
20970	1.0084	9.0004	0.96301	1.0471	0.29505	0.99999	Sdc3	syndecan 3
21413	0.47459	48.265	0.454	1.0453	0.29586	0.99999	Tcf4	transcription factor 4
213649	0.82922	14.51	0.79401	1.0443	0.29633	0.99999	Arhgef19	Rho guanine nucleotide exchange factor (GEF) 19
19045	-0.28132	493.63	0.26962	-1.0434	0.29678	0.99999	Ppp1ca	protein phosphatase 1 catalytic subunit alpha
65111	-0.43428	70.038	0.41626	-1.0433	0.29682	0.99999	Dap3	death associated protein 3
74781	0.43061	61.513	0.41296	1.0427	0.29707	0.99999	Wipi2	"WD repeat domain, phosphoinositide interacting 2"
50773	-0.43007	90.722	0.41245	-1.0427	0.29708	0.99999	Nt5c	"5',3'-nucleotidase, cytosolic"
14751	-0.27028	328.82	0.25927	-1.0424	0.29721	0.99999	Gpi1	glucose-6-phosphate isomerase 1
70356	-0.32133	173.16	0.30829	-1.0423	0.29727	0.99999	St13	suppression of tumorigenicity 13
330122	-1.7207	3.2339	1.6515	-1.0419	0.29745	0.99999	Cxcl3	chemokine (C-X-C motif) ligand 3
56505	-0.40325	78.568	0.38729	-1.0412	0.29778	0.99999	Ruvbl1	RuvB-like protein 1
12479	1.1795	6.4987	1.133	1.041	0.29786	0.99999	Cd1d1	CD1d1 antigen
214162	0.61564	27.796	0.59148	1.0408	0.29795	0.99999	Kmt2a	lysine (K)-specific methyltransferase 2A
73086	1.0798	7.7522	1.0376	1.0407	0.29802	0.99999	Rps6ka5	"ribosomal protein S6 kinase, polypeptide 5"
68949	0.40939	153.36	0.3936	1.0401	0.29829	0.99999	Zfas1	"zinc finger, NFX1-type containing 1, antisense RNA 1"
17931	0.44924	60.685	0.43239	1.039	0.29882	0.99999	Ppp1r12a	"protein phosphatase 1, regulatory subunit 12A"
105675	-0.52538	38.453	0.50605	-1.0382	0.29918	0.99999	Ppif	peptidylprolyl isomerase F (cyclophilin F)
140492	0.81441	13.751	0.78493	1.0375	0.29948	0.99999	Kcnn2	"potassium intermediate/small conductance calcium-activated channel, subfamily N, member 2"
233812	-0.70631	19.778	0.68129	-1.0367	0.29986	0.99999	Mosmo	modulator of smoothened
245474	-0.43609	91.953	0.42118	-1.0354	0.30048	0.99999	Dkc1	"dyskeratosis congenita 1, dyskerin"
110279	0.4867	45.474	0.47045	1.0345	0.30089	0.99999	Bcr	BCR activator of RhoGEF and GTPase
70465	-0.46727	57.359	0.4519	-1.034	0.30114	0.99999	Wdr77	WD repeat domain 77
28126	-0.43542	61.298	0.42134	-1.0334	0.30141	0.99999	Nop16	NOP16 nucleolar protein
21355	0.74113	23.172	0.71735	1.0332	0.30153	0.99999	Tap2	"transporter 2, ATP-binding cassette, sub-family B (MDR/TAP)"
14030	-0.44506	513.57	0.43119	-1.0321	0.302	0.99999	Ewsr1	Ewing sarcoma breakpoint region 1
67895	-0.32834	202.19	0.31814	-1.032	0.30205	0.99999	Ppa1	pyrophosphatase (inorganic) 1
436059	0.87735	12.012	0.85167	1.0302	0.30294	0.99999	Ces2h	carboxylesterase 2H
243819	-0.46186	53.062	0.44857	-1.0296	0.30319	0.99999	Ppp6r1	"protein phosphatase 6, regulatory subunit 1"
76500	0.46003	51.508	0.44741	1.0282	0.30385	0.99999	Ip6k2	inositol hexaphosphate kinase 2
20350	0.47323	83.482	0.46075	1.0271	0.30437	0.99999	Sema3f	"sema domain, immunoglobulin domain (Ig), short basic domain, secreted, (semaphorin) 3F"
56412	-0.54472	33.249	0.53066	-1.0265	0.30466	0.99999	Noa1	nitric oxide associated 1
18391	-0.49441	76.788	0.48182	-1.0261	0.30484	0.99999	Sigmar1	sigma non-opioid intracellular receptor 1
12709	-1.3099	5.2267	1.2767	-1.026	0.30488	0.99999	Ckb	"creatine kinase, brain"
110829	0.53226	40.182	0.51879	1.0259	0.30492	0.99999	Lims1	LIM and senescent cell antigen-like domains 1
170737	0.44143	56.992	0.43027	1.0259	0.30492	0.99999	Znrf1	zinc and ring finger 1
68089	-0.33829	117.98	0.32978	-1.0258	0.30499	0.99999	Arpc4	"actin related protein 2/3 complex, subunit 4"
16529	0.81536	13.737	0.79508	1.0255	0.30513	0.99999	Kcnk5	"potassium channel, subfamily K, member 5"
217125	1.3881	4.5039	1.3537	1.0254	0.30518	0.99999	Samd14	sterile alpha motif domain containing 14
67278	-0.66522	22.037	0.64976	-1.0238	0.30594	0.99999	Pagr1a	PAXIP1 associated glutamate rich protein 1A
18788	-2.5689	1.7291	2.51	-1.0235	0.30608	0.99999	Serpinb2	"serine (or cysteine) peptidase inhibitor, clade B, member 2"
103080	0.46467	54.104	0.45419	1.0231	0.30628	0.99999	Septin10	septin 10
12484	0.3147	344.19	0.30792	1.022	0.30677	0.99999	Cd24a	CD24a antigen
105239	0.46774	54.052	0.4591	1.0188	0.3083	0.99999	Rnf44	ring finger protein 44
71985	1.39	4.5092	1.3647	1.0185	0.30843	0.99999	Acad10	"acyl-Coenzyme A dehydrogenase family, member 10"
67169	1.39	4.5092	1.3647	1.0185	0.30843	0.99999	Nradd	neurotrophin receptor associated death domain
108098	-0.43113	61.821	0.42331	-1.0185	0.30845	0.99999	Med21	mediator complex subunit 21
215114	0.44505	53.042	0.4372	1.018	0.30869	0.99999	Hip1	huntingtin interacting protein 1
26949	-0.29773	183.25	0.29263	-1.0174	0.30896	0.99999	Vat1	vesicle amine transport 1
68031	0.49452	40.271	0.48647	1.0166	0.30936	0.99999	Rnf146	ring finger protein 146
66756	-0.7905	17.831	0.77796	-1.0161	0.30957	0.99999	Cfap97	cilia and flagella associated protein 97
94242	0.31273	209.69	0.30791	1.0156	0.3098	0.99999	Tinagl1	tubulointerstitial nephritis antigen-like 1
11647	2.0191	2.4956	1.9909	1.0142	0.31051	0.99999	Alpl	"alkaline phosphatase, liver/bone/kidney"
111241	0.255	1328.9	0.25147	1.014	0.31057	0.99999	Hmga1b	high mobility group AT-hook 1B
67840	-0.51887	37.769	0.51171	-1.014	0.31059	0.99999	Mrpl57	mitochondrial ribosomal protein L57
68316	-0.48138	47.94	0.4749	-1.0136	0.31075	0.99999	Apoo	apolipoprotein O
14470	-0.38058	87.632	0.37571	-1.013	0.31107	0.99999	Rabac1	Rab acceptor 1 (prenylated)
237459	0.58385	31.687	0.57638	1.013	0.31108	0.99999	Cdk17	cyclin-dependent kinase 17
13132	0.66707	20.013	0.6588	1.0126	0.31127	0.99999	Dab2	"disabled 2, mitogen-responsive phosphoprotein"
54709	-0.30118	234.54	0.29754	-1.0122	0.31143	0.99999	Eif3i	"eukaryotic translation initiation factor 3, subunit I"
17118	0.61761	24.001	0.61016	1.0122	0.31144	0.99999	Marcks	myristoylated alanine rich protein kinase C substrate
71934	-0.57866	27.489	0.57196	-1.0117	0.31168	0.99999	Car13	carbonic anhydrase 13
16651	0.36508	217.11	0.36092	1.0115	0.31177	0.99999	Sspn	sarcospan
105844	0.31195	201.04	0.30857	1.011	0.31204	0.99999	Card10	"caspase recruitment domain family, member 10"
74330	0.53932	34.31	0.53364	1.0106	0.31219	0.99999	Dnajc14	DnaJ heat shock protein family (Hsp40) member C14
56150	-0.44465	63.377	0.43998	-1.0106	0.3122	0.99999	Mad2l1	MAD2 mitotic arrest deficient-like 1
18148	-0.23549	2796.3	0.23306	-1.0104	0.3123	0.99999	Npm1	nucleophosmin 1
18477	-0.27738	519.53	0.27453	-1.0104	0.31231	0.99999	Prdx1	peroxiredoxin 1
23834	-0.55985	29.76	0.5544	-1.0098	0.31258	0.99999	Cdc6	cell division cycle 6
69731	-0.44532	59.849	0.44151	-1.0086	0.31315	0.99999	Gemin7	gem nuclear organelle associated protein 7
66867	0.52389	35.235	0.51942	1.0086	0.31316	0.99999	Hmg20a	high mobility group 20A
15115	-0.41477	66.054	0.41165	-1.0076	0.31365	0.99999	Hars	histidyl-tRNA synthetase
13144	0.48985	40.754	0.48712	1.0056	0.31461	0.99999	Dapk3	death-associated protein kinase 3
107449	0.42311	61.289	0.42103	1.0049	0.31493	0.99999	Unc5b	unc-5 netrin receptor B
18242	-0.42084	62.664	0.41888	-1.0047	0.31505	0.99999	Oat	ornithine aminotransferase
66940	0.35404	98.274	0.35243	1.0046	0.3151	0.99999	Shisa5	shisa family member 5
17089	-0.3531	136.97	0.3515	-1.0046	0.31511	0.99999	Lyar	Ly1 antibody reactive clone
13807	0.73653	17.228	0.73382	1.0037	0.31552	0.99999	Eno2	"enolase 2, gamma neuronal"
108660	-0.37798	97.39	0.37663	-1.0036	0.31558	0.99999	Rnf187	ring finger protein 187
75316	0.45401	259.96	0.45292	1.0024	0.31615	0.99999	Taf1d	"TATA-box binding protein associated factor, RNA polymerase I, D"
338365	1.199	5.7468	1.1964	1.0022	0.31624	0.99999	Slc41a2	"solute carrier family 41, member 2"
12831	0.86031	13.955	0.85882	1.0017	0.31647	0.99999	Col5a1	"collagen, type V, alpha 1"
68052	-0.35373	351.74	0.35314	-1.0017	0.3165	0.99999	Rps13	ribosomal protein S13
19173	-0.32251	161.6	0.32208	-1.0013	0.31666	0.99999	Psmb5	"proteasome (prosome, macropain) subunit, beta type 5"
14104	-0.38496	292.77	0.38453	-1.0011	0.31677	0.99999	Fasn	fatty acid synthase
75623	-0.47649	45.475	0.47638	-1.0002	0.3172	0.99999	Tex30	testis expressed 30
381695	0.58294	27.975	0.58302	0.99986	0.31738	0.99999	N4bp2l2	NEDD4 binding protein 2-like 2
13690	-0.31487	409.57	0.31499	-0.99961	0.3175	0.99999	Eif4g2	"eukaryotic translation initiation factor 4, gamma 2"
14241	1.3862	4.5227	1.3877	0.99892	0.31783	0.99999	Foxl1	forkhead box L1
67040	0.34634	167.32	0.34755	0.99651	0.319	0.99999	Ddx17	DEAD (Asp-Glu-Ala-Asp) box polypeptide 17
57080	0.44797	51.241	0.44963	0.99631	0.3191	0.99999	Gtf2ird1	general transcription factor II I repeat domain-containing 1
18591	-0.74539	17.45	0.74837	-0.99602	0.31924	0.99999	Pdgfb	"platelet derived growth factor, B polypeptide"
12512	0.2363	819.05	0.23732	0.99567	0.31941	0.99999	Cd63	CD63 antigen
12492	0.27997	266.48	0.28126	0.99541	0.31954	0.99999	Scarb2	"scavenger receptor class B, member 2"
21825	-0.61261	87.869	0.61549	-0.99532	0.31958	0.99999	Thbs1	thrombospondin 1
27403	0.80518	13.001	0.80916	0.99508	0.3197	0.99999	Abca7	"ATP-binding cassette, sub-family A (ABC1), member 7"
18263	0.3972	844.4	0.39926	0.99483	0.31982	0.99999	Odc1	"ornithine decarboxylase, structural 1"
29858	-0.73197	17.944	0.73607	-0.99443	0.32002	0.99999	Pmm1	phosphomannomutase 1
56390	-0.43757	81.479	0.44014	-0.99416	0.32014	0.99999	Znrd2	zinc ribbon domain containing 2
23989	0.40997	162.09	0.41242	0.99404	0.3202	0.99999	Med24	mediator complex subunit 24
269951	-0.3077	147.49	0.30964	-0.99372	0.32036	0.99999	Idh2	"isocitrate dehydrogenase 2 (NADP+), mitochondrial"
16161	1.1481	8.0537	1.1557	0.99348	0.32048	0.99999	Il12rb1	"interleukin 12 receptor, beta 1"
11767	0.51789	42.63	0.52135	0.99336	0.32053	0.99999	Ap1m1	"adaptor-related protein complex AP-1, mu subunit 1"
30058	-0.50889	37	0.51259	-0.99279	0.32081	0.99999	Timm8a1	translocase of inner mitochondrial membrane 8A1
12091	0.52221	33.998	0.52602	0.99277	0.32082	0.99999	Glb1	"galactosidase, beta 1"
20643	-0.25754	336.48	0.25948	-0.99251	0.32095	0.99999	Snrpe	small nuclear ribonucleoprotein E
17155	0.53987	35.443	0.5442	0.99205	0.32117	0.99999	Man1a	"mannosidase 1, alpha"
235627	0.5172	41.371	0.52175	0.99128	0.32155	0.99999	Nbeal2	neurobeachin-like 2
22142	-0.30203	768.25	0.30484	-0.99079	0.32179	0.99999	Tuba1a	"tubulin, alpha 1A"
56453	0.35802	96.88	0.36156	0.9902	0.32207	0.99999	Mbtps1	"membrane-bound transcription factor peptidase, site 1"
17085	-1.0763	7.0067	1.0898	-0.98761	0.32334	0.99999	Ly9	lymphocyte antigen 9
101612	-0.51305	38.26	0.5205	-0.98567	0.32429	0.99999	Grwd1	glutamate-rich WD repeat containing 1
66407	-0.38496	78.579	0.39063	-0.98548	0.32439	0.99999	Mrps15	mitochondrial ribosomal protein S15
21780	0.41109	61.063	0.41756	0.98451	0.32487	0.99999	Tfam	"transcription factor A, mitochondrial"
67155	0.45615	51.937	0.46333	0.9845	0.32487	0.99999	Smarca2	"SWI/SNF related, matrix associated, actin dependent regulator of chromatin, subfamily a, member 2"
109154	0.36926	80.024	0.37516	0.98428	0.32498	0.99999	Mlec	malectin
15529	0.48708	39.511	0.49493	0.98413	0.32505	0.99999	Sdc2	syndecan 2
67742	-1.452	3.7436	1.4757	-0.98395	0.32514	0.99999	Samsn1	"SAM domain, SH3 domain and nuclear localization signals, 1"
21841	0.5929	32.616	0.60258	0.98393	0.32515	0.99999	Tia1	cytotoxic granule-associated RNA binding protein 1
14998	0.80078	13.031	0.81423	0.98348	0.32537	0.99999	H2-DMa	"histocompatibility 2, class II, locus DMa"
68420	-0.44958	58.119	0.45738	-0.98293	0.32564	0.99999	Ankrd13a	ankyrin repeat domain 13a
14085	0.48934	40.818	0.49831	0.98199	0.3261	0.99999	Fah	fumarylacetoacetate hydrolase
70737	-0.53101	31.237	0.54105	-0.98144	0.32638	0.99999	Cgn	cingulin
233406	-0.32855	115.28	0.33484	-0.98122	0.32648	0.99999	Prc1	protein regulator of cytokinesis 1
224024	0.61566	33.66	0.62828	0.97993	0.32712	0.99999	Scarf2	"scavenger receptor class F, member 2"
14791	-0.34224	121.67	0.34941	-0.97948	0.32735	0.99999	Emg1	EMG1 N1-specific pseudouridine methyltransferase
192170	-0.30648	154.05	0.31292	-0.9794	0.32738	0.99999	Eif4a3	eukaryotic translation initiation factor 4A3
74589	-0.54224	35.029	0.55366	-0.97936	0.3274	0.99999	Kbtbd12	kelch repeat and BTB (POZ) domain containing 12
12453	0.37506	85.243	0.38324	0.97864	0.32776	0.99999	Ccni	cyclin I
75430	-0.62215	22.242	0.63575	-0.9786	0.32778	0.99999	Anapc15	anaphase promoting complex C subunit 15
641340	0.60278	23.265	0.6161	0.97839	0.32788	0.99999	Nrbf2	nuclear receptor binding factor 2
66310	-0.37121	130.07	0.37944	-0.97831	0.32792	0.99999	Dpy30	"dpy-30, histone methyltransferase complex regulatory subunit"
22059	0.47172	42.231	0.48236	0.97795	0.3281	0.99999	Trp53	transformation related protein 53
70549	0.89927	9.9901	0.91965	0.97785	0.32815	0.99999	Tln2	talin 2
54130	-0.34804	104.87	0.35599	-0.97767	0.32824	0.99999	Actr1a	"ARP1 actin-related protein 1A, centractin alpha"
227358	-0.60252	25.189	0.61744	-0.97584	0.32914	0.99999	Erfe	erythroferrone
192662	-0.29635	575.51	0.30386	-0.97529	0.32941	0.99999	Arhgdia	Rho GDP dissociation inhibitor (GDI) alpha
26912	-0.42937	64.127	0.44029	-0.9752	0.32946	0.99999	Gcat	glycine C-acetyltransferase (2-amino-3-ketobutyrate-coenzyme A ligase)
215708	-0.60605	22.751	0.62183	-0.97461	0.32975	0.99999	Miga1	mitoguardin 1
106064	0.56057	27.772	0.57551	0.97404	0.33003	0.99999	AW549877	expressed sequence AW549877
102693	0.38322	75.335	0.39359	0.97366	0.33023	0.99999	Phldb1	"pleckstrin homology like domain, family B, member 1"
68197	-0.33212	109.17	0.34117	-0.97349	0.33031	0.99999	Ndufc2	NADH:ubiquinone oxidoreductase subunit C2
70572	-0.28292	193.74	0.29069	-0.97328	0.33041	0.99999	Ipo5	importin 5
14183	0.50546	55.712	0.51987	0.97228	0.33091	0.99999	Fgfr2	fibroblast growth factor receptor 2
20440	0.63758	21.008	0.65603	0.97188	0.33111	0.99999	St6gal1	"beta galactoside alpha 2,6 sialyltransferase 1"
21753	0.31259	140.29	0.32181	0.97137	0.33136	0.99999	Tes	testis derived transcript
109672	-0.511	38.332	0.52636	-0.97082	0.33164	0.99999	Cyb5a	cytochrome b5 type A (microsomal)
13196	0.34259	99.492	0.35296	0.97062	0.33174	0.99999	Asap1	"ArfGAP with SH3 domain, ankyrin repeat and PH domain1"
69126	-0.33624	218.53	0.34647	-0.97046	0.33182	0.99999	Rbis	ribosomal biogenesis factor
54673	-0.37262	77.033	0.38416	-0.96997	0.33206	0.99999	Sh3glb1	SH3-domain GRB2-like B1 (endophilin)
67178	0.728	15.274	0.75116	0.96917	0.33246	0.99999	Zmat5	"zinc finger, matrin type 5"
69527	-0.4102	57.746	0.42338	-0.96887	0.33261	0.99999	Mrps9	mitochondrial ribosomal protein S9
56312	-0.4735	142.74	0.48876	-0.96879	0.33265	0.99999	Nupr1	nuclear protein transcription regulator 1
56473	-0.36481	112.97	0.37658	-0.96873	0.33268	0.99999	Fads2	fatty acid desaturase 2
17387	0.36356	111.51	0.37531	0.9687	0.3327	0.99999	Mmp14	matrix metallopeptidase 14 (membrane-inserted)
14924	0.65086	20.469	0.67228	0.96814	0.33297	0.99999	Magi1	"membrane associated guanylate kinase, WW and PDZ domain containing 1"
98415	-0.38654	70.562	0.39948	-0.96761	0.33324	0.99999	Nucks1	nuclear casein kinase and cyclin-dependent kinase substrate 1
70420	-0.55092	29.032	0.56974	-0.96698	0.33355	0.99999	Arpin	actin-related protein 2/3 complex inhibitor
235633	0.29454	171.16	0.30531	0.96471	0.33469	0.99999	Als2cl	ALS2 C-terminal like
214580	-0.58167	25.017	0.603	-0.96464	0.33473	0.99999	Pstk	phosphoseryl-tRNA kinase
20311	-0.43636	80.735	0.45273	-0.96383	0.33513	0.99999	Cxcl5	chemokine (C-X-C motif) ligand 5
26754	-0.35803	84.033	0.3716	-0.96348	0.33531	0.99999	Cops5	COP9 signalosome subunit 5
244745	0.44987	48.958	0.46746	0.96237	0.33586	0.99999	Dpy19l1	dpy-19-like 1 (C. elegans)
102641031	0.46139	71.571	0.47972	0.96178	0.33616	0.99999	LOC102641031	interferon-activable protein 203
74051	0.41195	57.491	0.42848	0.96142	0.33634	0.99999	Steap2	six transmembrane epithelial antigen of prostate 2
12580	0.38248	90.468	0.39817	0.96059	0.33676	0.99999	Cdkn2c	cyclin dependent kinase inhibitor 2C
56420	-0.33424	104.7	0.34803	-0.96037	0.33687	0.99999	Ppp4c	"protein phosphatase 4, catalytic subunit"
54135	-0.34786	88.228	0.36285	-0.95869	0.33771	0.99999	Lsr	lipolysis stimulated lipoprotein receptor
74211	0.53902	28.746	0.56271	0.9579	0.33811	0.99999	1700017B05Rik	RIKEN cDNA 1700017B05 gene
20430	-0.37703	70.273	0.39383	-0.95734	0.3384	0.99999	Cyfip1	cytoplasmic FMR1 interacting protein 1
67199	-0.35089	96.34	0.36663	-0.95706	0.33853	0.99999	Pfdn1	prefoldin 1
68652	0.38424	67.235	0.40156	0.95687	0.33863	0.99999	Tab2	TGF-beta activated kinase 1/MAP3K7 binding protein 2
625249	0.27609	604.46	0.28863	0.95654	0.3388	0.99999	Gpx4	glutathione peroxidase 4
66368	-0.4112	57.797	0.42992	-0.95645	0.33884	0.99999	Rtca	RNA 3'-terminal phosphate cyclase
67226	0.70867	15.743	0.74123	0.95607	0.33904	0.99999	Tmem19	transmembrane protein 19
13713	0.3403	141.07	0.35603	0.95583	0.33916	0.99999	Elk3	"ELK3, member of ETS oncogene family"
71795	0.85654	10.494	0.89616	0.95578	0.33918	0.99999	Pitpnc1	"phosphatidylinositol transfer protein, cytoplasmic 1"
80384	-0.52084	33.524	0.54514	-0.95542	0.33937	0.99999	Tex21	testis expressed gene 21
17220	0.30759	173.76	0.3221	0.95496	0.3396	0.99999	Mcm7	minichromosome maintenance complex component 7
12585	-0.62206	22.215	0.65184	-0.95431	0.33993	0.99999	Cdr2	cerebellar degeneration-related 2
16985	1.2349	5.0026	1.2943	0.95411	0.34003	0.99999	Lsp1	lymphocyte specific 1
76408	1.2349	5.0026	1.2943	0.95411	0.34003	0.99999	Abcc3	"ATP-binding cassette, sub-family C (CFTR/MRP), member 3"
67893	0.87305	11.254	0.91514	0.95401	0.34008	0.99999	Tmem86a	transmembrane protein 86A
268396	0.60604	22.025	0.63528	0.95397	0.3401	0.99999	Sh3pxd2b	SH3 and PX domains 2B
227753	-0.30507	182.94	0.32005	-0.95321	0.34049	0.99999	Gsn	gelsolin
12465	-0.23084	615.6	0.24228	-0.95281	0.34069	0.99999	Cct5	"chaperonin containing Tcp1, subunit 5 (epsilon)"
22294	-0.57902	24.957	0.60775	-0.95273	0.34073	0.99999	Uxt	ubiquitously expressed prefoldin like chaperone
216136	0.80656	12.969	0.84689	0.95238	0.34091	0.99999	Ilvbl	ilvB (bacterial acetolactate synthase)-like
15452	-0.38784	64.743	0.4075	-0.95175	0.34122	0.99999	Hprt	hypoxanthine guanine phosphoribosyl transferase
80288	0.52503	31.04	0.5521	0.95096	0.34162	0.99999	Bcl9l	B cell CLL/lymphoma 9-like
67160	-0.22988	655.64	0.24183	-0.95059	0.34181	0.99999	Eef1g	eukaryotic translation elongation factor 1 gamma
208777	1.5994	3.0078	1.6831	0.95031	0.34195	0.99999	Sned1	"sushi, nidogen and EGF-like domains 1"
17721	0.24613	1123.7	0.259	0.95029	0.34197	0.99999	mt-Nd5	"NADH dehydrogenase 5, mitochondrial"
27993	-0.50425	37.561	0.53071	-0.95014	0.34204	0.99999	Imp4	"IMP4, U3 small nucleolar ribonucleoprotein"
15251	0.35548	99.383	0.37458	0.94902	0.34261	0.99999	Hif1a	"hypoxia inducible factor 1, alpha subunit"
69047	0.65505	19.221	0.69042	0.94877	0.34274	0.99999	Atp2c2	"ATPase, Ca++ transporting, type 2C, member 2"
18032	0.36475	97.208	0.38488	0.94768	0.34329	0.99999	Nfix	nuclear factor I/X
14570	-0.66507	18.767	0.7021	-0.94725	0.34351	0.99999	Arhgdig	Rho GDP dissociation inhibitor (GDI) gamma
72269	0.73398	15.223	0.7754	0.94659	0.34385	0.99999	Cda	cytidine deaminase
102075	1.8149	2.2558	1.9181	0.94623	0.34403	0.99999	Plekhg4	"pleckstrin homology domain containing, family G (with RhoGef domain) member 4"
66105	-0.2431	436.9	0.25716	-0.94534	0.34449	0.99999	Ube2d3	ubiquitin-conjugating enzyme E2D 3
66985	-0.52218	34.835	0.55264	-0.94488	0.34472	0.99999	Rassf7	Ras association (RalGDS/AF-6) domain family (N-terminal) member 7
12466	-0.24565	497.73	0.26001	-0.94476	0.34478	0.99999	Cct6a	"chaperonin containing Tcp1, subunit 6a (zeta)"
28030	-0.41944	55.066	0.44406	-0.94457	0.34488	0.99999	Gfm1	"G elongation factor, mitochondrial 1"
66223	-0.73227	13.999	0.77591	-0.94375	0.3453	0.99999	Mrpl35	mitochondrial ribosomal protein L35
110695	-0.57759	23.727	0.61204	-0.9437	0.34532	0.99999	Aldh7a1	"aldehyde dehydrogenase family 7, member A1"
26451	-0.24265	335.8	0.25722	-0.94336	0.3455	0.99999	Rpl27a	ribosomal protein L27A
29864	0.37634	86.366	0.399	0.9432	0.34558	0.99999	Rnf11	ring finger protein 11
227541	0.64193	40.545	0.6812	0.94236	0.34601	0.99999	Camk1d	calcium/calmodulin-dependent protein kinase ID
12750	0.41691	56.445	0.44251	0.94215	0.34612	0.99999	Clk4	CDC like kinase 4
20091	-0.20613	1772.5	0.21885	-0.94191	0.34624	0.99999	Rps3a1	ribosomal protein S3A1
217337	-0.36627	72.26	0.38895	-0.94169	0.34635	0.99999	Srp68	signal recognition particle 68
19139	-0.42826	48.748	0.45532	-0.94057	0.34692	0.99999	Prps1	phosphoribosyl pyrophosphate synthetase 1
72565	0.38678	64.965	0.41126	0.94046	0.34698	0.99999	Uaca	uveal autoantigen with coiled-coil domains and ankyrin repeats
15402	0.48815	49.93	0.51907	0.94044	0.34699	0.99999	Hoxa5	homeobox A5
68653	-0.49577	35.045	0.52718	-0.94042	0.347	0.99999	Samm50	SAMM50 sorting and assembly machinery component
14194	-0.39967	57.508	0.42544	-0.93943	0.34751	0.99999	Fh1	fumarate hydratase 1
100502825	-0.27175	458.76	0.28932	-0.93926	0.34759	0.99999	Rpl37rt	"ribosomal protein L37, retrotransposed"
66230	-0.4939	36.792	0.52618	-0.93864	0.34792	0.99999	Mrps28	mitochondrial ribosomal protein S28
94191	0.49992	37.259	0.53316	0.93765	0.34842	0.99999	Adarb2	"adenosine deaminase, RNA-specific, B2"
71207	0.30837	125.07	0.32896	0.93741	0.34855	0.99999	Nudt4	nudix (nucleoside diphosphate linked moiety X)-type motif 4
66381	-1.799	2.2441	1.9197	-0.93711	0.3487	0.99999	Rnf113a2	ring finger protein 113A2
72027	0.58799	30.422	0.62749	0.93704	0.34874	0.99999	Slc39a4	"solute carrier family 39 (zinc transporter), member 4"
67383	-0.67573	19.57	0.72128	-0.93684	0.34884	0.99999	Carnmt1	carnosine N-methyltransferase 1
12387	0.24239	678.97	0.25879	0.93662	0.34895	0.99999	Ctnnb1	"catenin (cadherin associated protein), beta 1"
66119	-0.36943	158.75	0.39451	-0.93643	0.34905	0.99999	Tomm6	translocase of outer mitochondrial membrane 6
107734	-0.31675	126.64	0.33827	-0.93639	0.34907	0.99999	Mrpl30	mitochondrial ribosomal protein L30
14251	0.41159	54.013	0.43985	0.93575	0.3494	0.99999	Flot1	flotillin 1
103733	-0.41444	53.806	0.44293	-0.93568	0.34944	0.99999	Tubg1	"tubulin, gamma 1"
319887	1.2114	5.7411	1.2952	0.93532	0.34962	0.99999	E030030I06Rik	RIKEN cDNA E030030I06 gene
66212	-0.2653	208.56	0.28366	-0.93527	0.34965	0.99999	Sec61b	Sec61 beta subunit
208092	-0.40931	77.711	0.43765	-0.93523	0.34967	0.99999	Chmp6	charged multivesicular body protein 6
94063	-0.50144	36.307	0.53629	-0.93501	0.34978	0.99999	Mrpl16	mitochondrial ribosomal protein L16
228033	-0.2689	392.09	0.28791	-0.93396	0.35032	0.99999	Atp5g3	"ATP synthase, H+ transporting, mitochondrial F0 complex, subunit C3 (subunit 9)"
27756	-0.40425	100.82	0.4331	-0.93338	0.35062	0.99999	Lsm2	"LSM2 homolog, U6 small nuclear RNA and mRNA degradation associated"
19185	-0.2671	226.9	0.28619	-0.93327	0.35068	0.99999	Psmd4	"proteasome (prosome, macropain) 26S subunit, non-ATPase, 4"
110750	-0.35252	91.872	0.37781	-0.93308	0.35078	0.99999	Cse1l	chromosome segregation 1-like (S. cerevisiae)
68209	-0.41495	52.035	0.44472	-0.93304	0.3508	0.99999	Rnaseh2c	"ribonuclease H2, subunit C"
12631	-0.21999	1091.3	0.23579	-0.93298	0.35083	0.99999	Cfl1	"cofilin 1, non-muscle"
50911	-0.43951	46.025	0.47122	-0.9327	0.35097	0.99999	Exosc9	exosome component 9
77862	-0.39227	75.411	0.42059	-0.93267	0.35099	0.99999	Thyn1	thymocyte nuclear protein 1
16423	0.3293	98.981	0.35314	0.93249	0.35108	0.99999	Cd47	"CD47 antigen (Rh-related antigen, integrin-associated signal transducer)"
630836	1.093	6.2778	1.1744	0.9307	0.35201	0.99999	2010315B03Rik	RIKEN cDNA 2010315B03 gene
20863	3.4625	1.0129	3.722	0.93027	0.35223	0.99999	Stfa3	stefin A3
57905	-0.45933	45.842	0.49388	-0.93005	0.35235	0.99999	Isy1	ISY1 splicing factor homolog
66286	-0.3729	82.637	0.40122	-0.92943	0.35266	0.99999	Sec11c	"SEC11 homolog C, signal peptidase complex subunit"
72469	0.48014	37.047	0.5167	0.92924	0.35277	0.99999	Plcd3	"phospholipase C, delta 3"
211896	-0.53597	33.848	0.57717	-0.92861	0.35309	0.99999	Depdc7	DEP domain containing 7
104027	0.89197	9.2353	0.96098	0.92818	0.35331	0.99999	Synpo	synaptopodin
107029	-0.45221	41.522	0.48757	-0.92748	0.35368	0.99999	Me2	"malic enzyme 2, NAD(+)-dependent, mitochondrial"
72275	-0.60941	39.981	0.65727	-0.92718	0.35383	0.99999	2200002D01Rik	RIKEN cDNA 2200002D01 gene
12321	0.23968	337.69	0.25866	0.92665	0.35411	0.99999	Calu	calumenin
54403	-0.48028	37.766	0.51839	-0.92649	0.35419	0.99999	Slc4a4	"solute carrier family 4 (anion exchanger), member 4"
12018	-0.39882	74.424	0.43056	-0.92629	0.35429	0.99999	Bak1	BCL2-antagonist/killer 1
28193	0.50615	32.059	0.54655	0.92608	0.3544	0.99999	Reep3	receptor accessory protein 3
67678	-0.36573	104.5	0.39493	-0.92606	0.35441	0.99999	Lsm3	"LSM3 homolog, U6 small nuclear RNA and mRNA degradation associated"
231830	0.393	58.23	0.42459	0.92558	0.35466	0.99999	Micall2	MICAL-like 2
246277	0.81807	10.998	0.88395	0.92548	0.35472	0.99999	Csad	cysteine sulfinic acid decarboxylase
66108	-0.39301	58.53	0.42484	-0.92508	0.35493	0.99999	Ndufa9	NADH:ubiquinone oxidoreductase subunit A9
67695	-0.34529	101.92	0.37329	-0.92498	0.35498	0.99999	Ost4	oligosaccharyltransferase complex subunit 4 (non-catalytic)
67994	-0.5466	26.535	0.59122	-0.92453	0.35521	0.99999	Mrps11	mitochondrial ribosomal protein S11
12332	-0.24913	481.87	0.26953	-0.92431	0.35533	0.99999	Capg	"capping protein (actin filament), gelsolin-like"
108699	0.4904	33.036	0.53067	0.9241	0.35543	0.99999	Chn1	chimerin 1
13177	-0.51873	29.274	0.56141	-0.92398	0.3555	0.99999	Eci1	enoyl-Coenzyme A delta isomerase 1
20324	-0.83063	16.62	0.89935	-0.92359	0.3557	0.99999	Cavin2	caveolae associated 2
14009	0.55801	25.276	0.60425	0.92346	0.35577	0.99999	Etv1	ets variant 1
108155	0.57839	50.036	0.62651	0.9232	0.35591	0.99999	Ogt	O-linked N-acetylglucosamine (GlcNAc) transferase (UDP-N-acetylglucosamine:polypeptide-N-acetylglucosaminyl transferase)
13601	0.36682	91.742	0.39779	0.92213	0.35646	0.99999	Ecm1	extracellular matrix protein 1
53607	-0.28807	148.54	0.31251	-0.9218	0.35663	0.99999	Snrpa	small nuclear ribonucleoprotein polypeptide A
18176	-0.35197	77.03	0.3819	-0.92164	0.35671	0.99999	Nras	neuroblastoma ras oncogene
18400	2.3349	1.501	2.5353	0.92095	0.35708	0.99999	Slc22a18	"solute carrier family 22 (organic cation transporter), member 18"
625018	2.3349	1.501	2.5353	0.92095	0.35708	0.99999	C4a	complement component 4A (Rodgers blood group)
268977	0.36772	70.211	0.39935	0.9208	0.35716	0.99999	Ltbp1	latent transforming growth factor beta binding protein 1
252967	1.5885	2.9865	1.7271	0.91974	0.35771	0.99999	Ropn1l	ropporin 1-like
67669	-0.4386	44.296	0.4769	-0.9197	0.35773	0.99999	Hikeshi	heat shock protein nuclear import factor
22594	-0.47716	34.742	0.51902	-0.91934	0.35792	0.99999	Xrcc1	X-ray repair complementing defective repair in Chinese hamster cells 1
20621	0.61912	22.828	0.67379	0.91886	0.35817	0.99999	Snn	stannin
20638	-0.24149	308.23	0.2629	-0.91855	0.35833	0.99999	Snrpb	small nuclear ribonucleoprotein B
73389	0.50416	35.504	0.5489	0.91849	0.35836	0.99999	Hbp1	high mobility group box transcription factor 1
233071	2.3299	1.4957	2.5369	0.9184	0.35841	0.99999	Arhgap33	Rho GTPase activating protein 33
67681	-0.35235	79.319	0.38381	-0.91805	0.35859	0.99999	Mrpl18	mitochondrial ribosomal protein L18
70640	-0.74923	12.761	0.8163	-0.91784	0.3587	0.99999	Dcp2	decapping mRNA 2
16331	2.3227	1.5092	2.5321	0.91733	0.35897	0.99999	Inpp5d	inositol polyphosphate-5-phosphatase D
74754	-0.37922	129.92	0.41353	-0.91703	0.35913	0.99999	Dhcr24	24-dehydrocholesterol reductase
72278	0.94474	8.0031	1.0304	0.91683	0.35923	0.99999	Ccpg1	cell cycle progression 1
11429	-0.31439	109.07	0.3431	-0.91631	0.3595	0.99999	Aco2	"aconitase 2, mitochondrial"
67270	-0.29655	196.98	0.32364	-0.91628	0.35952	0.99999	Mrpl42	mitochondrial ribosomal protein L42
320982	0.36673	108.8	0.40027	0.91622	0.35955	0.99999	Arl4c	ADP-ribosylation factor-like 4C
20135	-0.29928	136.34	0.32668	-0.91615	0.35959	0.99999	Rrm2	ribonucleotide reductase M2
121022	0.38979	148.83	0.42553	0.91601	0.35966	0.99999	Mrps6	mitochondrial ribosomal protein S6
14630	-0.43294	48.195	0.47264	-0.91601	0.35966	0.99999	Gclm	"glutamate-cysteine ligase, modifier subunit"
14871	1.2697	4.2453	1.3863	0.91589	0.35973	0.99999	Gstt1	"glutathione S-transferase, theta 1"
17248	0.51929	28.519	0.567	0.91584	0.35975	0.99999	Mdm4	transformed mouse 3T3 cell double minute 4
19895	-0.44644	40.235	0.48755	-0.91568	0.35984	0.99999	Rpia	ribose 5-phosphate isomerase A
73836	-0.39161	56.726	0.42774	-0.91553	0.35991	0.99999	Slc35b2	"solute carrier family 35, member B2"
74998	0.84408	9.7475	0.92203	0.91546	0.35995	0.99999	Rab11fip2	RAB11 family interacting protein 2 (class I)
636808	2.3177	1.5038	2.5336	0.91478	0.36031	0.99999	Cntnap5a	contactin associated protein-like 5A
68119	0.38848	66.388	0.4247	0.91472	0.36034	0.99999	Cmtm3	CKLF-like MARVEL transmembrane domain containing 3
15015	0.42115	88.246	0.46048	0.91458	0.36041	0.99999	H2-Q4	"histocompatibility 2, Q region locus 4"
68183	-0.34273	95.884	0.37487	-0.91427	0.36058	0.99999	Bcas2	breast carcinoma amplified sequence 2
12238	0.3363	134.07	0.36792	0.91404	0.36069	0.99999	Commd3	COMM domain containing 3
22321	-0.21602	982.71	0.23634	-0.914	0.36072	0.99999	Vars	valyl-tRNA synthetase
52653	-0.34763	80.312	0.38039	-0.91386	0.36079	0.99999	Nudcd2	NudC domain containing 2
16779	0.52503	29.735	0.57466	0.91363	0.36091	0.99999	Lamb2	"laminin, beta 2"
70456	-0.51733	29.204	0.56633	-0.91347	0.36099	0.99999	Mpc2	mitochondrial pyruvate carrier 2
66366	0.34966	78.318	0.38308	0.91275	0.36138	0.99999	Ergic3	ERGIC and golgi 3
105827	0.88964	9.2864	0.97547	0.91201	0.36176	0.99999	Amigo2	adhesion molecule with Ig like domain 2
52850	-2.3153	1.4917	2.5394	-0.91178	0.36188	0.99999	Sgsm1	small G protein signaling modulator 1
224170	0.57788	21.766	0.63418	0.91121	0.36218	0.99999	Dzip3	"DAZ interacting protein 3, zinc finger"
108829	0.4793	60.041	0.52619	0.91089	0.36235	0.99999	Jmjd1c	jumonji domain containing 1C
15975	0.54682	25.783	0.60034	0.91087	0.36237	0.99999	Ifnar1	interferon (alpha and beta) receptor 1
224613	0.41621	55.333	0.45697	0.91081	0.3624	0.99999	Flywch1	FLYWCH-type zinc finger 1
110958	-1.4613	3.7815	1.6056	-0.9101	0.36277	0.99999	M1ap	meiosis 1 associated protein
619547	-0.20726	819.87	0.22781	-0.90977	0.36294	0.99999	Rpl34-ps1	"ribosomal protein L34, pseudogene 1"
27407	-0.34169	98.912	0.37584	-0.90915	0.36327	0.99999	Abcf2	"ATP-binding cassette, sub-family F (GCN20), member 2"
12017	-0.29859	138.65	0.32856	-0.90877	0.36347	0.99999	Bag1	BCL2-associated athanogene 1
74205	-0.39048	55.003	0.4298	-0.90851	0.36361	0.99999	Acsl3	acyl-CoA synthetase long-chain family member 3
12176	-0.33836	117.77	0.37247	-0.90843	0.36365	0.99999	Bnip3	BCL2/adenovirus E1B interacting protein 3
170942	0.24702	438.08	0.27194	0.90834	0.3637	0.99999	Erdr1	erythroid differentiation regulator 1
27386	-3.4153	0.98201	3.7602	-0.90826	0.36374	0.99999	Npas3	neuronal PAS domain protein 3
52637	-0.43489	44.722	0.47882	-0.90825	0.36374	0.99999	Cisd1	CDGSH iron sulfur domain 1
21956	-0.29498	243.22	0.32498	-0.90769	0.36404	0.99999	Tnnt2	"troponin T2, cardiac"
18117	-0.34556	92.874	0.38071	-0.90769	0.36404	0.99999	Emc8	ER membrane protein complex subunit 8
66155	-0.39097	54.992	0.43098	-0.90717	0.36432	0.99999	Ufc1	ubiquitin-fold modifier conjugating enzyme 1
217325	-0.58274	22.539	0.6425	-0.90699	0.36441	0.99999	Llgl2	LLGL2 scribble cell polarity complex component
80280	0.47092	34.505	0.51968	0.90617	0.36484	0.99999	Cdk5rap3	CDK5 regulatory subunit associated protein 3
108167694	0.35635	78.922	0.39334	0.90594	0.36497	0.99999	LOC108167694	serine/threonine-protein phosphatase 2A regulatory subunit B'' subunit delta-like
71889	-1.2561	4.237	1.3869	-0.90565	0.36512	0.99999	Epn3	epsin 3
68988	-0.4973	35.083	0.54943	-0.90513	0.3654	0.99999	Prpf31	pre-mRNA processing factor 31
60411	-0.58666	23.239	0.64823	-0.90502	0.36545	0.99999	Cenpk	centromere protein K
66922	-0.46348	35.756	0.51246	-0.90443	0.36577	0.99999	Rras2	related RAS viral (r-ras) oncogene 2
66144	-0.28867	160.44	0.31932	-0.90402	0.36598	0.99999	Atp6v1f	"ATPase, H+ transporting, lysosomal V1 subunit F"
66192	-0.51778	32.335	0.57284	-0.90388	0.36606	0.99999	Lage3	"L antigen family, member 3"
52700	-0.31519	109.09	0.34877	-0.90371	0.36615	0.99999	Txndc17	thioredoxin domain containing 17
56095	-0.3386	91.249	0.37469	-0.90369	0.36616	0.99999	Ftsj3	FtsJ RNA methyltransferase homolog 3 (E. coli)
67223	-0.41224	52.574	0.45625	-0.90354	0.36624	0.99999	Rrp15	ribosomal RNA processing 15 homolog (S. cerevisiae)
66495	-0.37578	60.981	0.41595	-0.90342	0.3663	0.99999	Ndufb3	NADH:ubiquinone oxidoreductase subunit B3
19175	-0.26518	215.64	0.29381	-0.90253	0.36677	0.99999	Psmb6	"proteasome (prosome, macropain) subunit, beta type 6"
226747	-0.3919	55.017	0.43425	-0.90247	0.36681	0.99999	Ahctf1	AT hook containing transcription factor 1
226539	-0.6124	18.987	0.67866	-0.90237	0.36686	0.99999	Dars2	aspartyl-tRNA synthetase 2 (mitochondrial)
66060	-0.3447	111.79	0.38224	-0.90178	0.36717	0.99999	Cystm1	cysteine-rich transmembrane module containing 1
17149	-0.29452	136.08	0.32662	-0.90172	0.3672	0.99999	Magoh	"mago homolog, exon junction complex core component"
26893	-0.31262	105.06	0.34685	-0.90129	0.36744	0.99999	Cops6	COP9 signalosome subunit 6
224902	0.31018	104.51	0.34415	0.90128	0.36744	0.99999	Safb2	scaffold attachment factor B2
53600	-0.28327	164.35	0.31435	-0.90113	0.36752	0.99999	Timm23	translocase of inner mitochondrial membrane 23
27979	-0.29429	303.69	0.3267	-0.90079	0.3677	0.99999	Eif3b	"eukaryotic translation initiation factor 3, subunit B"
73340	0.49879	32.577	0.55445	0.8996	0.36833	0.99999	Nptxr	neuronal pentraxin receptor
12549	0.88026	8.5075	0.9789	0.89924	0.36853	0.99999	Arhgap31	Rho GTPase activating protein 31
68070	-0.27476	201.96	0.30555	-0.89923	0.36853	0.99999	Pdzd2	PDZ domain containing 2
17384	0.55571	23.98	0.61816	0.89897	0.36867	0.99999	Mmp10	matrix metallopeptidase 10
56516	0.38323	59.705	0.42653	0.89849	0.36892	0.99999	Rbms2	"RNA binding motif, single stranded interacting protein 2"
110557	0.34563	116.84	0.38496	0.89785	0.36927	0.99999	H2-Q6	"histocompatibility 2, Q region locus 6"
18195	-0.5563	23.517	0.61965	-0.89775	0.36932	0.99999	Nsf	N-ethylmaleimide sensitive fusion protein
66120	-0.44149	42.562	0.49202	-0.89728	0.36957	0.99999	Fkbp11	FK506 binding protein 11
22029	0.47474	37.443	0.52947	0.89664	0.36991	0.99999	Traf1	TNF receptor-associated factor 1
12215	0.22247	621.62	0.2482	0.89634	0.37007	0.99999	Bsg	basigin
22113	-0.37533	63.257	0.41877	-0.89627	0.37011	0.99999	Phlda2	"pleckstrin homology like domain, family A, member 2"
15191	-0.24433	349.87	0.27266	-0.89608	0.37021	0.99999	Hdgf	heparin binding growth factor
84585	0.53528	26.298	0.59782	0.89539	0.37058	0.99999	Rnf123	ring finger protein 123
50933	-0.31909	105.8	0.35644	-0.89522	0.37067	0.99999	Uchl3	ubiquitin carboxyl-terminal esterase L3 (ubiquitin thiolesterase)
75593	-0.63388	17.261	0.70826	-0.89497	0.3708	0.99999	Malsu1	mitochondrial assembly of ribosomal large subunit 1
56279	-0.63388	17.261	0.70826	-0.89497	0.3708	0.99999	Dipk1b	divergent protein kinase domain 1B
58521	0.37569	62.593	0.41991	0.89469	0.37096	0.99999	Eid1	EP300 interacting inhibitor of differentiation 1
433182	-0.20991	1314.4	0.23462	-0.89467	0.37096	0.99999	Eno1b	"enolase 1B, retrotransposed"
226518	0.51506	27.274	0.57578	0.89454	0.37103	0.99999	Nmnat2	nicotinamide nucleotide adenylyltransferase 2
66253	0.4362	43.946	0.48768	0.89444	0.37109	0.99999	Aig1	androgen-induced 1
22248	0.56491	22.278	0.63164	0.89436	0.37113	0.99999	Unc119	unc-119 lipid binding chaperone
81500	0.68942	14.983	0.77154	0.89356	0.37156	0.99999	Sil1	endoplasmic reticulum chaperone SIL1 homolog (S. cerevisiae)
56693	0.43082	73.537	0.48248	0.89293	0.3719	0.99999	Crtap	cartilage associated protein
110147	0.30292	126.69	0.33932	0.89272	0.37201	0.99999	Ehmt2	euchromatic histone lysine N-methyltransferase 2
14886	0.31549	103.58	0.35354	0.89238	0.37219	0.99999	Gtf2i	general transcription factor II I
22121	-0.19421	2730.8	0.21774	-0.89193	0.37243	0.99999	Rpl13a	ribosomal protein L13A
212326	-0.4641	35.791	0.52043	-0.89176	0.37252	0.99999	Fam149a	"family with sequence similarity 149, member A"
26445	-0.30327	222.52	0.3401	-0.8917	0.37256	0.99999	Psmb2	"proteasome (prosome, macropain) subunit, beta type 2"
66611	1.8042	2.2398	2.0234	0.89165	0.37258	0.99999	Ribc1	RIB43A domain with coiled-coils 1
21938	0.65567	19.326	0.73543	0.89155	0.37264	0.99999	Tnfrsf1b	"tumor necrosis factor receptor superfamily, member 1b"
20382	-0.23825	337.81	0.26725	-0.89149	0.37266	0.99999	Srsf2	serine and arginine-rich splicing factor 2
12846	0.33723	78.521	0.37842	0.89114	0.37285	0.99999	Comt	catechol-O-methyltransferase
107272	-0.34922	178.31	0.3921	-0.89064	0.37312	0.99999	Psat1	phosphoserine aminotransferase 1
71709	0.72972	17.35	0.81983	0.89009	0.37342	0.99999	Syde1	"synapse defective 1, Rho GTPase, homolog 1 (C. elegans)"
67870	-0.45815	36.261	0.51473	-0.89008	0.37342	0.99999	Enoph1	enolase-phosphatase 1
53331	0.47329	32.777	0.53177	0.89004	0.37345	0.99999	Stx7	syntaxin 7
29875	-0.32499	108.31	0.36519	-0.88993	0.37351	0.99999	Iqgap1	IQ motif containing GTPase activating protein 1
66447	-0.54369	24.016	0.61124	-0.88948	0.37375	0.99999	Mgst3	microsomal glutathione S-transferase 3
78816	0.55166	22.761	0.62045	0.88913	0.37393	0.99999	Gmip	Gem-interacting protein
57330	0.60819	20.806	0.6847	0.88825	0.3744	0.99999	Gigyf1	GRB10 interacting GYF protein 1
54624	-0.39385	58.601	0.44342	-0.88822	0.37442	0.99999	Paf1	"Paf1, RNA polymerase II complex component"
103537	0.59444	19.995	0.66957	0.8878	0.37465	0.99999	Mbtd1	mbt domain containing 1
54197	0.42587	45.081	0.48017	0.88692	0.37512	0.99999	Rnf5	ring finger protein 5
74778	-0.40335	50.012	0.45483	-0.88682	0.37518	0.99999	Rrp7a	ribosomal RNA processing 7 homolog A (S. cerevisiae)
78653	-0.59918	20.762	0.67573	-0.88671	0.37523	0.99999	Bola3	bolA-like 3 (E. coli)
55989	-0.27003	279.81	0.30473	-0.88612	0.37555	0.99999	Nop58	NOP58 ribonucleoprotein
16434	-0.51651	31.079	0.58317	-0.88569	0.37579	0.99999	Itpa	inosine triphosphatase (nucleoside triphosphate pyrophosphatase)
114585	-1.0894	6.2894	1.2301	-0.88557	0.37585	0.99999	D17H6S53E	"DNA segment, Chr 17, human D6S53E"
68576	-0.35276	69.038	0.39876	-0.88465	0.37634	0.99999	Lamtor5	"late endosomal/lysosomal adaptor, MAPK and MTOR activator 5"
53618	0.40263	47.516	0.45519	0.88453	0.37641	0.99999	Fut8	fucosyltransferase 8
24030	-0.47508	31.744	0.53725	-0.88428	0.37655	0.99999	Mrps12	mitochondrial ribosomal protein S12
17395	-0.71106	32.979	0.80412	-0.88427	0.37655	0.99999	Mmp9	matrix metallopeptidase 9
15507	-2.2992	1.4889	2.6023	-0.8835	0.37697	0.99999	Hspb1	heat shock protein 1
11670	1.272	4.2748	1.4398	0.88345	0.37699	0.99999	Aldh3a1	"aldehyde dehydrogenase family 3, subfamily A1"
28114	-0.29216	134.86	0.33083	-0.88312	0.37717	0.99999	Nsun2	NOL1/NOP2/Sun domain family member 2
382056	0.87981	8.5263	0.99636	0.88302	0.37723	0.99999	Crtc1	CREB regulated transcription coactivator 1
67704	-0.39049	53.299	0.44227	-0.88293	0.37727	0.99999	1810037I17Rik	RIKEN cDNA 1810037I17 gene
68617	0.43695	38.751	0.49505	0.88263	0.37744	0.99999	Mtcl1	microtubule crosslinking factor 1
24070	0.40311	47.546	0.45698	0.88213	0.37771	0.99999	Mpdu1	mannose-P-dolichol utilization defect 1
69064	-0.82852	9.7622	0.93952	-0.88185	0.37786	0.99999	Fuom	fucose mutarotase
73750	1.8252	2.2423	2.0701	0.88168	0.37795	0.99999	Whrn	whirlin
110253	0.30634	101.49	0.3476	0.8813	0.37815	0.99999	Triobp	TRIO and F-actin binding protein
211914	0.40593	49.303	0.46069	0.88113	0.37825	0.99999	Asap2	"ArfGAP with SH3 domain, ankyrin repeat and PH domain 2"
66536	-0.86877	8.4841	0.987	-0.88021	0.37875	0.99999	Nipsnap3b	nipsnap homolog 3B
23874	-0.3688	60.237	0.4193	-0.87955	0.3791	0.99999	Farsb	"phenylalanyl-tRNA synthetase, beta subunit"
50767	0.49189	30.048	0.55934	0.87942	0.37917	0.99999	Pnpla6	patatin-like phospholipase domain containing 6
435684	0.93555	7.2511	1.0644	0.87891	0.37945	0.99999	Shf	Src homology 2 domain containing F
67149	-0.49802	33.324	0.56667	-0.87885	0.37948	0.99999	Nkain1	Na+/K+ transporting ATPase interacting 1
78372	-0.50865	28.546	0.57931	-0.87802	0.37993	0.99999	Snrnp25	small nuclear ribonucleoprotein 25 (U11/U12)
78339	0.47189	34.558	0.53761	0.87774	0.38008	0.99999	Ttyh3	tweety family member 3
110379	-0.32326	102.15	0.36835	-0.87759	0.38016	0.99999	Sec13	"SEC13 homolog, nuclear pore and COPII coat complex component"
93747	-0.41398	43.246	0.47214	-0.87682	0.38058	0.99999	Echs1	"enoyl Coenzyme A hydratase, short chain, 1, mitochondrial"
67736	-0.86534	8.4948	0.9879	-0.87594	0.38106	0.99999	Ccdc130	coiled-coil domain containing 130
19027	0.35351	69.219	0.40362	0.87586	0.38111	0.99999	Sypl	synaptophysin-like protein
110962	0.52322	25.497	0.59781	0.87522	0.38145	0.99999	Mbd6	methyl-CpG binding domain protein 6
108903	-0.5544	24.803	0.63416	-0.87422	0.382	0.99999	Tbcd	tubulin-specific chaperone d
73174	0.6783	14.242	0.77603	0.87406	0.38209	0.99999	Tbkbp1	TBK1 binding protein 1
109232	-0.44234	37.263	0.50617	-0.87391	0.38217	0.99999	Sccpdh	saccharopine dehydrogenase (putative)
66201	0.35636	64.302	0.40813	0.87316	0.38258	0.99999	Vta1	vesicle (multivesicular body) trafficking 1
16950	0.8809	8.5316	1.0091	0.87294	0.38269	0.99999	Loxl3	lysyl oxidase-like 3
16420	-1.8078	2.2388	2.071	-0.87291	0.38271	0.99999	Itgb6	integrin beta 6
14884	-0.41488	48.427	0.47529	-0.87289	0.38272	0.99999	Gtf2h1	"general transcription factor II H, polypeptide 1"
28088	0.27761	148.68	0.31806	0.87282	0.38276	0.99999	Rtcb	"RNA 2',3'-cyclic phosphate and 5'-OH ligase"
233908	-0.24246	441.24	0.27816	-0.87164	0.3834	0.99999	Fus	fused in sarcoma
269023	0.71407	12.514	0.81947	0.87138	0.38355	0.99999	Zfp608	zinc finger protein 608
22628	0.28133	222.45	0.32319	0.87048	0.38404	0.99999	Ywhag	"tyrosine 3-monooxygenase/tryptophan 5-monooxygenase activation protein, gamma polypeptide"
208618	-0.36004	65.827	0.41419	-0.86925	0.38471	0.99999	Etl4	enhancer trap locus 4
56436	-0.28471	135.61	0.32754	-0.86923	0.38472	0.99999	Adrm1	adhesion regulating molecule 1
19362	-0.64842	16.773	0.74687	-0.86819	0.38529	0.99999	Rad51ap1	RAD51 associated protein 1
103140	0.65176	15.98	0.751	0.86785	0.38548	0.99999	Gstt3	"glutathione S-transferase, theta 3"
19062	0.71581	12.505	0.82505	0.8676	0.38562	0.99999	Inpp5k	inositol polyphosphate 5-phosphatase K
20297	1.0947	6.216	1.2619	0.86755	0.38564	0.99999	Ccl20	chemokine (C-C motif) ligand 20
15925	-0.3959	52.833	0.45642	-0.86741	0.38572	0.99999	Ide	insulin degrading enzyme
54397	0.64482	17.307	0.7435	0.86728	0.38579	0.99999	Ppt2	palmitoyl-protein thioesterase 2
60534	-0.88933	9.2936	1.0261	-0.86668	0.38612	0.99999	Fancg	"Fanconi anemia, complementation group G"
108124	-0.30845	94.729	0.35603	-0.86634	0.38631	0.99999	Napa	N-ethylmaleimide sensitive fusion protein attachment protein alpha
17246	0.41671	77.754	0.48126	0.86586	0.38657	0.99999	Mdm2	transformed mouse 3T3 cell double minute 2
70381	0.71347	12.489	0.82403	0.86583	0.38658	0.99999	Tecpr1	tectonin beta-propeller repeat containing 1
11867	0.21945	418.4	0.25362	0.86527	0.38689	0.99999	Arpc1b	"actin related protein 2/3 complex, subunit 1B"
22110	0.46882	31.491	0.54192	0.86509	0.38699	0.99999	Tspyl1	"testis-specific protein, Y-encoded-like 1"
75646	0.30443	99.718	0.35199	0.86487	0.38711	0.99999	Rai14	retinoic acid induced 14
18226	-0.38488	90.443	0.44551	-0.86392	0.38763	0.99999	Nup62	nucleoporin 62
546143	1.335	3.4958	1.5456	0.86373	0.38774	0.99999	Ccpg1os	"cell cycle progression 1, opposite strand"
234582	0.71313	12.527	0.82642	0.86292	0.38818	0.99999	Ccdc102a	coiled-coil domain containing 102A
53972	1.0112	6.0029	1.1718	0.86291	0.38819	0.99999	Ngef	neuronal guanine nucleotide exchange factor
52469	-0.39834	57.94	0.46189	-0.86242	0.38845	0.99999	Coa3	cytochrome C oxidase assembly factor 3
228140	0.33166	91.424	0.38463	0.86226	0.38854	0.99999	Tnks1bp1	tankyrase 1 binding protein 1
107702	-0.30179	117.33	0.35016	-0.86187	0.38876	0.99999	Rnh1	ribonuclease/angiogenin inhibitor 1
15519	-0.24377	772.21	0.28292	-0.86162	0.3889	0.99999	Hsp90aa1	"heat shock protein 90, alpha (cytosolic), class A member 1"
70134	-1.2569	4.2235	1.4589	-0.8615	0.38896	0.99999	Misp3	MISP family member 3
75320	0.43369	37.498	0.50361	0.86115	0.38916	0.99999	Etnk1	ethanolamine kinase 1
107684	0.85974	705.88	0.99899	0.8606	0.38946	0.99999	Coro2a	"coronin, actin binding protein 2A"
15530	0.34416	93.105	0.40001	0.86038	0.38958	0.99999	Hspg2	perlecan (heparan sulfate proteoglycan 2)
66129	0.54966	21.494	0.63911	0.86003	0.38977	0.99999	Prxl2c	peroxiredoxin like 2C
104248	0.41652	40.755	0.48441	0.85984	0.38988	0.99999	Cabin1	calcineurin binding protein 1
67808	0.39906	48.077	0.46426	0.85957	0.39003	0.99999	Tprgl	transformation related protein 63 regulated like
18541	0.40687	43.491	0.47339	0.85948	0.39008	0.99999	Pcnt	pericentrin (kendrin)
93684	-0.24584	403.89	0.28608	-0.85934	0.39015	0.99999	Selenof	selenoprotein F
66845	-0.26427	150.02	0.30758	-0.85918	0.39024	0.99999	Mrpl33	mitochondrial ribosomal protein L33
223650	-0.50978	34.677	0.59357	-0.85883	0.39043	0.99999	Eppk1	epiplakin 1
19652	-0.26596	823.28	0.30968	-0.85883	0.39044	0.99999	Rbm3	"RNA binding motif (RNP1, RRM) protein 3"
94280	0.40843	45.31	0.47557	0.85881	0.39044	0.99999	Sfxn3	sideroflexin 3
12390	-0.44761	38.42	0.52129	-0.85865	0.39053	0.99999	Cav2	caveolin 2
71409	0.61	16.997	0.71043	0.85864	0.39054	0.99999	Fmnl2	formin-like 2
101351	-0.7634	11.456	0.88909	-0.85863	0.39055	0.99999	Eogt	EGF domain-specific O-linked N-acetylglucosamine (GlcNAc) transferase
231003	0.55059	21.524	0.64128	0.85858	0.39057	0.99999	Klhl17	kelch-like 17
53415	0.62803	16.48	0.73165	0.85837	0.39069	0.99999	Htatip2	HIV-1 Tat interactive protein 2
19280	0.27875	148.22	0.32492	0.85791	0.39094	0.99999	Ptprs	"protein tyrosine phosphatase, receptor type, S"
73720	-0.70289	12.507	0.82011	-0.85707	0.3914	0.99999	Cst6	cystatin E/M
108156	-0.39125	64.914	0.45671	-0.85667	0.39163	0.99999	Mthfd1	"methylenetetrahydrofolate dehydrogenase (NADP+ dependent), methenyltetrahydrofolate cyclohydrolase, formyltetrahydrofolate synthase"
70584	-0.48545	28.263	0.56722	-0.85583	0.39209	0.99999	Pak4	p21 (RAC1) activated kinase 4
18624	-0.58037	18.747	0.6783	-0.85563	0.3922	0.99999	Pepd	peptidase D
13589	-0.37812	55.284	0.44219	-0.85509	0.3925	0.99999	Mapre1	"microtubule-associated protein, RP/EB family, member 1"
16174	-0.66146	14.227	0.77377	-0.85486	0.39263	0.99999	Il18rap	interleukin 18 receptor accessory protein
75292	0.43373	39.306	0.5075	0.85465	0.39275	0.99999	Prkd3	protein kinase D3
57752	0.37738	54.585	0.44169	0.85441	0.39288	0.99999	Tacc2	"transforming, acidic coiled-coil containing protein 2"
235682	0.38067	50.509	0.44591	0.85369	0.39328	0.99999	Zfp445	zinc finger protein 445
215194	-0.3876	49.785	0.45409	-0.85356	0.39335	0.99999	Kri1	KRI1 homolog
54563	-0.81902	9.0126	0.95962	-0.85349	0.39339	0.99999	Nup210	nucleoporin 210
14062	0.33896	74.447	0.39775	0.85219	0.39411	0.99999	F2r	coagulation factor II (thrombin) receptor
74450	0.44507	34.799	0.52268	0.85151	0.39448	0.99999	Pank2	pantothenate kinase 2
380773	-0.4745	30.501	0.55749	-0.85112	0.3947	0.99999	Slirp	SRA stem-loop interacting RNA binding protein
21917	0.24953	198.95	0.2934	0.85046	0.39507	0.99999	Tmpo	thymopoietin
70350	-0.29495	157.66	0.34709	-0.84978	0.39545	0.99999	Basp1	"brain abundant, membrane attached signal protein 1"
57778	0.46096	49.456	0.54248	0.84974	0.39547	0.99999	Fmnl1	formin-like 1
27402	-0.64151	16.027	0.75499	-0.84969	0.3955	0.99999	Pdhx	"pyruvate dehydrogenase complex, component X"
56612	-0.34097	83.633	0.40136	-0.84953	0.39558	0.99999	Pfdn5	prefoldin 5
230971	0.68274	14.255	0.804	0.84917	0.39578	0.99999	Megf6	multiple EGF-like-domains 6
268294	0.87092	7.758	1.026	0.84881	0.39599	0.99999	Zbtb24	zinc finger and BTB domain containing 24
30957	0.35592	60.228	0.41937	0.8487	0.39605	0.99999	Mapk8ip3	mitogen-activated protein kinase 8 interacting protein 3
239027	0.37433	53.31	0.44116	0.84852	0.39615	0.99999	Arhgap22	Rho GTPase activating protein 22
66315	0.72663	11.255	0.85649	0.84838	0.39623	0.99999	Senp7	SUMO1/sentrin specific peptidase 7
15476	0.71639	14.573	0.84495	0.84784	0.39653	0.99999	Hs3st1	heparan sulfate (glucosamine) 3-O-sulfotransferase 1
19414	0.40657	41.774	0.47981	0.84737	0.39679	0.99999	Rasa3	RAS p21 protein activator 3
68114	0.39865	51.625	0.47074	0.84685	0.39708	0.99999	Pwwp3a	"PWWP domain containing 3A, DNA repair factor"
20658	0.27206	144.16	0.32152	0.84616	0.39746	0.99999	Son	Son DNA binding protein
16905	-0.19898	1021.2	0.23551	-0.84485	0.39819	0.99999	Lmna	lamin A
100169864	-0.58289	18.771	0.68994	-0.84484	0.3982	0.99999	Gm44504	"predicted readthrough transcript (NMD candidate), 44504"
66487	-1.1116	4.7386	1.3158	-0.8448	0.39822	0.99999	Smim4	small integral membrane protein 4
66263	-0.89293	9.283	1.0574	-0.84442	0.39844	0.99999	1810014B01Rik	RIKEN cDNA 1810014B01 gene
21833	0.53264	23.739	0.63086	0.8443	0.3985	0.99999	Thra	thyroid hormone receptor alpha
229906	-0.37995	49.011	0.45024	-0.84387	0.39874	0.99999	Gtf2b	general transcription factor IIB
19687	-0.39415	51.093	0.46721	-0.84363	0.39887	0.99999	Rfc1	replication factor C (activator 1) 1
72096	-0.53872	21.495	0.63888	-0.84323	0.3991	0.99999	Eef1akmt2	EEF1A lysine methyltransferase 2
15490	-0.60118	19.556	0.713	-0.84317	0.39913	0.99999	Hsd17b7	hydroxysteroid (17-beta) dehydrogenase 7
17125	0.50788	24.74	0.60263	0.84277	0.39936	0.99999	Smad1	SMAD family member 1
17219	-0.27803	153.2	0.33019	-0.84203	0.39977	0.99999	Mcm6	minichromosome maintenance complex component 6
98314	-0.70186	12.526	0.83365	-0.84191	0.39984	0.99999	D2hgdh	D-2-hydroxyglutarate dehydrogenase
56447	-0.39111	49.821	0.46496	-0.84117	0.40025	0.99999	Copz1	"coatomer protein complex, subunit zeta 1"
193742	0.4842	31.844	0.57581	0.8409	0.4004	0.99999	Abhd16a	abhydrolase domain containing 16A
12521	0.40307	43.963	0.47959	0.84044	0.40066	0.99999	Cd82	CD82 antigen
67949	-0.37005	58.536	0.44043	-0.8402	0.40079	0.99999	Nifk	nucleolar protein interacting with the FHA domain of MKI67
14910	-0.63182	17.191	0.75204	-0.84014	0.40083	0.99999	Gt(ROSA)26Sor	"gene trap ROSA 26, Philippe Soriano"
117150	0.38973	45.508	0.46392	0.84009	0.40086	0.99999	Pip4k2c	"phosphatidylinositol-5-phosphate 4-kinase, type II, gamma"
20833	-0.24358	236.98	0.29012	-0.83958	0.40114	0.99999	Ssrp1	structure specific recognition protein 1
110751	1.3253	3.5228	1.5795	0.83906	0.40143	0.99999	Adam33	a disintegrin and metallopeptidase domain 33
74277	0.37055	57.681	0.44165	0.83902	0.40146	0.99999	Chic2	cysteine-rich hydrophobic domain 2
66162	-0.53893	21.522	0.64234	-0.839	0.40147	0.99999	Bola2	bolA-like 2 (E. coli)
19192	-0.32119	89.617	0.38284	-0.83898	0.40148	0.99999	Psme3	"proteaseome (prosome, macropain) activator subunit 3 (PA28 gamma, Ki)"
71772	0.44074	33.51	0.52533	0.83898	0.40148	0.99999	Plbd2	phospholipase B domain containing 2
106512	0.53171	23.785	0.6338	0.83893	0.40151	0.99999	Gpsm3	"G-protein signalling modulator 3 (AGS3-like, C. elegans)"
66997	-0.29608	111.14	0.35295	-0.83886	0.40155	0.99999	Psmd12	"proteasome (prosome, macropain) 26S subunit, non-ATPase, 12"
70699	-0.33842	69.825	0.40353	-0.83865	0.40166	0.99999	Nup205	nucleoporin 205
65112	-0.39578	70.974	0.47205	-0.83842	0.4018	0.99999	Pmepa1	"prostate transmembrane protein, androgen induced 1"
100273	0.3721	67.871	0.44385	0.83834	0.40184	0.99999	Osbpl9	oxysterol binding protein-like 9
69459	0.35738	58.041	0.42648	0.83798	0.40204	0.99999	Ubl7	ubiquitin-like 7 (bone marrow stromal cell-derived)
12739	-0.36906	103.63	0.44069	-0.83745	0.40234	0.99999	Cldn3	claudin 3
107071	-0.34767	70.522	0.41517	-0.83742	0.40236	0.99999	Wdr74	WD repeat domain 74
69752	-0.43617	37.67	0.52106	-0.83708	0.40255	0.99999	Zfp511	zinc finger protein 511
112407	0.32088	85.379	0.38338	0.83696	0.40261	0.99999	Egln3	egl-9 family hypoxia-inducible factor 3
68611	-0.31125	82.514	0.37217	-0.83631	0.40298	0.99999	Mrpl28	mitochondrial ribosomal protein L28
15200	0.33745	83.366	0.4036	0.8361	0.4031	0.99999	Hbegf	heparin-binding EGF-like growth factor
68465	0.35481	58.061	0.42471	0.83541	0.40349	0.99999	Adipor2	adiponectin receptor 2
27357	-0.38219	46.754	0.45789	-0.83469	0.40389	0.99999	Gyg	glycogenin
68094	0.32681	81.629	0.39211	0.83347	0.40458	0.99999	Smarcc2	"SWI/SNF related, matrix associated, actin dependent regulator of chromatin, subfamily c, member 2"
215999	0.50578	24.732	0.60701	0.83322	0.40472	0.99999	Mcu	mitochondrial calcium uniporter
11845	-0.26469	155.91	0.31769	-0.83317	0.40475	0.99999	Arf6	ADP-ribosylation factor 6
229709	-0.32019	77.679	0.3844	-0.83297	0.40486	0.99999	Ahcyl1	S-adenosylhomocysteine hydrolase-like 1
103406	1.4255	2.7492	1.7116	0.83283	0.40494	0.99999	Zfr2	zinc finger RNA binding protein 2
17122	1.0169	6.0001	1.2211	0.83275	0.40499	0.99999	Mxd4	Max dimerization protein 4
20598	0.52631	22.529	0.63241	0.83223	0.40528	0.99999	Smpd2	"sphingomyelin phosphodiesterase 2, neutral"
17684	0.27693	131.15	0.33278	0.83218	0.40531	0.99999	Cited2	"Cbp/p300-interacting transactivator, with Glu/Asp-rich carboxy-terminal domain, 2"
54194	0.43015	38.028	0.51703	0.83196	0.40543	0.99999	Akap8l	A kinase (PRKA) anchor protein 8-like
12798	0.28969	118.41	0.3482	0.83196	0.40543	0.99999	Cnn2	calponin 2
223921	-0.44168	32.493	0.53127	-0.83136	0.40577	0.99999	Aaas	"achalasia, adrenocortical insufficiency, alacrimia"
56048	0.46794	33.184	0.56296	0.83121	0.40585	0.99999	Lgals8	"lectin, galactose binding, soluble 8"
74392	0.51318	23.02	0.61802	0.83035	0.40634	0.99999	Specc1l	sperm antigen with calponin homology and coiled-coil domains 1-like
231413	-0.33986	66.915	0.40939	-0.83015	0.40645	0.99999	Grsf1	G-rich RNA sequence binding factor 1
23821	0.44541	41.388	0.53685	0.82967	0.40673	0.99999	Bace1	beta-site APP cleaving enzyme 1
52696	0.23132	230.16	0.27902	0.82906	0.40707	0.99999	Zwint	ZW10 interactor
70997	1.4286	2.7545	1.7231	0.82906	0.40707	0.99999	Spef1	sperm flagellar 1
14137	-0.37238	67.928	0.44922	-0.82895	0.40713	0.99999	Fdft1	farnesyl diphosphate farnesyl transferase 1
69534	-0.35111	59.274	0.4239	-0.82829	0.40751	0.99999	Avpi1	arginine vasopressin-induced 1
214112	1.4162	2.7574	1.7111	0.8277	0.40784	0.99999	Nipal4	NIPA-like domain containing 4
68117	-0.54767	19.736	0.66179	-0.82756	0.40792	0.99999	Apool	apolipoprotein O-like
13197	0.52545	38.66	0.63514	0.8273	0.40807	0.99999	Gadd45a	growth arrest and DNA-damage-inducible 45 alpha
56456	-0.33184	69.054	0.40137	-0.82677	0.40836	0.99999	Actl6a	actin-like 6A
17938	0.18518	1179	0.22399	0.8267	0.40841	0.99999	Naca	nascent polypeptide-associated complex alpha polypeptide
94066	-0.42925	35.273	0.51959	-0.82613	0.40873	0.99999	Mrpl36	mitochondrial ribosomal protein L36
73139	-0.39608	43.546	0.47944	-0.82612	0.40874	0.99999	Cenpv	centromere protein V
72611	0.56743	24.662	0.68709	0.82584	0.40889	0.99999	Zfp655	zinc finger protein 655
109801	-0.25383	150.53	0.30755	-0.82533	0.40919	0.99999	Glo1	glyoxalase 1
20630	-0.29018	190.71	0.35187	-0.82467	0.40956	0.99999	Snrpc	U1 small nuclear ribonucleoprotein C
66164	-0.31308	94.358	0.37971	-0.82452	0.40964	0.99999	Nip7	"NIP7, nucleolar pre-rRNA processing protein"
27981	0.35501	85.963	0.43061	0.82444	0.40969	0.99999	Rsrp1	arginine/serine rich protein 1
19655	-0.49571	24.768	0.60137	-0.8243	0.40977	0.99999	Rbmx	"RNA binding motif protein, X chromosome"
192156	-0.45872	42.911	0.55678	-0.8239	0.41	0.99999	Mvd	mevalonate (diphospho) decarboxylase
69227	-0.31257	86.95	0.37944	-0.82377	0.41007	0.99999	Selenot	selenoprotein T
214498	-0.38588	44.476	0.46844	-0.82376	0.41007	0.99999	Cdc73	"cell division cycle 73, Paf1/RNA polymerase II complex component"
22215	-0.54905	19.726	0.66676	-0.82345	0.41025	0.99999	Ube3a	ubiquitin protein ligase E3A
13030	0.24954	202.32	0.30309	0.82331	0.41033	0.99999	Ctsb	cathepsin B
20463	0.23536	212.2	0.28592	0.82316	0.41042	0.99999	Cox7a2l	cytochrome c oxidase subunit 7A2 like
217410	0.74392	12.058	0.90379	0.82311	0.41045	0.99999	Trib2	tribbles pseudokinase 2
14056	-0.33822	62.951	0.41095	-0.82301	0.4105	0.99999	Ezh2	enhancer of zeste 2 polycomb repressive complex 2 subunit
73924	0.2347	222.62	0.28527	0.82273	0.41066	0.99999	4930401O12Rik	RIKEN cDNA 4930401O12 gene
13684	-0.27082	189.8	0.32919	-0.82271	0.41067	0.99999	Eif4e	eukaryotic translation initiation factor 4E
445007	-0.31388	87.072	0.38223	-0.8212	0.41153	0.99999	Nup85	nucleoporin 85
223723	-0.49636	24.776	0.60474	-0.82079	0.41177	0.99999	Ttll12	"tubulin tyrosine ligase-like family, member 12"
65960	0.35526	54.033	0.43303	0.82041	0.41198	0.99999	Twsg1	twisted gastrulation BMP signaling modulator 1
21857	-0.31508	81.592	0.38409	-0.82034	0.41203	0.99999	Timp1	tissue inhibitor of metalloproteinase 1
170756	0.57545	18.035	0.70173	0.82004	0.41219	0.99999	Slc8b1	"solute carrier family 8 (sodium/lithium/calcium exchanger), member B1"
14004	-0.2071	383.9	0.25256	-0.82003	0.4122	0.99999	Chchd2	coiled-coil-helix-coiled-coil-helix domain containing 2
11771	-0.35351	56.542	0.4313	-0.81964	0.41242	0.99999	Ap2a1	"adaptor-related protein complex 2, alpha 1 subunit"
14268	0.26839	1008.6	0.32756	0.81938	0.41257	0.99999	Fn1	fibronectin 1
12457	-0.47886	26.957	0.58463	-0.81908	0.41274	0.99999	Noct	nocturnin
74764	0.92786	6.491	1.1329	0.81904	0.41277	0.99999	Klc4	kinesin light chain 4
15381	-0.22414	292.53	0.27367	-0.81902	0.41277	0.99999	Hnrnpc	heterogeneous nuclear ribonucleoprotein C
100043314	0.37996	50.436	0.46417	0.81857	0.41303	0.99999	Tigit	T cell immunoreceptor with Ig and ITIM domains
69241	-0.40499	38.992	0.49494	-0.81826	0.41321	0.99999	Polr2d	polymerase (RNA) II (DNA directed) polypeptide D
21652	0.56054	18.515	0.68525	0.818	0.41336	0.99999	Phf1	PHD finger protein 1
360013	0.43779	37.478	0.53523	0.81795	0.41339	0.99999	Myo18a	myosin XVIIIA
51886	-0.26666	125.3	0.32633	-0.81716	0.41383	0.99999	Fubp1	far upstream element (FUSE) binding protein 1
30795	-0.23931	183.54	0.29287	-0.81714	0.41385	0.99999	Fkbp3	FK506 binding protein 3
68011	-0.28652	104.46	0.35069	-0.817	0.41393	0.99999	Snrpg	small nuclear ribonucleoprotein polypeptide G
20273	-0.77808	9.517	0.95286	-0.81657	0.41417	0.99999	Scn8a	"sodium channel, voltage-gated, type VIII, alpha"
22409	-1.4077	2.7375	1.7243	-0.81634	0.4143	0.99999	Wnt10a	"wingless-type MMTV integration site family, member 10A"
214359	-1.4077	2.7375	1.7243	-0.81634	0.4143	0.99999	Tmem51	transmembrane protein 51
12364	0.93076	6.5016	1.1407	0.81594	0.41453	0.99999	Casp12	caspase 12
15331	-0.27835	234.31	0.34129	-0.8156	0.41473	0.99999	Hmgn2	high mobility group nucleosomal binding domain 2
56280	-0.40558	39.027	0.49757	-0.81511	0.41501	0.99999	Mrpl37	mitochondrial ribosomal protein L37
216080	0.36116	59.37	0.44311	0.81506	0.41504	0.99999	Ube2d1	ubiquitin-conjugating enzyme E2D 1
54214	0.33129	64.736	0.40656	0.81485	0.41516	0.99999	Golga4	"golgi autoantigen, golgin subfamily a, 4"
103841	0.47924	26.239	0.58862	0.81418	0.41554	0.99999	Cuedc1	CUE domain containing 1
59025	-0.31452	79.17	0.38632	-0.81414	0.41556	0.99999	Usp14	ubiquitin specific peptidase 14
269470	-0.39666	41.777	0.48742	-0.81378	0.41577	0.99999	Wdr3	WD repeat domain 3
15404	0.69409	11.78	0.85345	0.81327	0.41606	0.99999	Hoxa7	homeobox A7
71389	0.63613	13.988	0.78231	0.81314	0.41614	0.99999	Chd6	chromodomain helicase DNA binding protein 6
22793	0.25866	153.23	0.31833	0.81253	0.41649	0.99999	Zyx	zyxin
67017	0.74625	10.017	0.91858	0.81239	0.41657	0.99999	Fam210b	"family with sequence similarity 210, member B"
11819	-0.68414	11.747	0.84214	-0.81238	0.41657	0.99999	Nr2f2	"nuclear receptor subfamily 2, group F, member 2"
235323	0.55077	21.448	0.67801	0.81233	0.4166	0.99999	Usp28	ubiquitin specific peptidase 28
66870	-0.19214	814.17	0.23657	-0.81221	0.41667	0.99999	Serbp1	serpine1 mRNA binding protein 1
56374	0.25253	168.67	0.31114	0.81165	0.41699	0.99999	Tmem59	transmembrane protein 59
234779	0.37611	51.522	0.46365	0.81119	0.41726	0.99999	Plcg2	"phospholipase C, gamma 2"
66492	-0.40985	36.743	0.50534	-0.81105	0.41734	0.99999	Zmat2	"zinc finger, matrin type 2"
66190	-0.53175	24.429	0.65607	-0.81051	0.41765	0.99999	Acer3	alkaline ceramidase 3
67454	0.41562	35.524	0.51288	0.81035	0.41774	0.99999	Ikbip	IKBKB interacting protein
170748	-0.53574	20.227	0.66119	-0.81027	0.41778	0.99999	Smco4	single-pass membrane protein with coiled-coil domains 4
210711	-0.42819	35.303	0.52852	-0.81017	0.41785	0.99999	Mcmbp	minichromosome maintenance complex binding protein
67846	0.38581	43.745	0.47634	0.80995	0.41797	0.99999	Tmem39a	transmembrane protein 39a
73945	0.27973	102.77	0.34553	0.80958	0.41818	0.99999	Otud4	OTU domain containing 4
20441	0.81602	8.2702	1.008	0.80954	0.41821	0.99999	St3gal3	"ST3 beta-galactoside alpha-2,3-sialyltransferase 3"
20587	0.33273	75.162	0.41116	0.80926	0.41836	0.99999	Smarcb1	"SWI/SNF related, matrix associated, actin dependent regulator of chromatin, subfamily b, member 1"
76497	-0.33288	84.44	0.41147	-0.809	0.41851	0.99999	Ppp1r11	"protein phosphatase 1, regulatory inhibitor subunit 11"
216456	-0.77179	9.4709	0.95405	-0.80896	0.41854	0.99999	Gls2	"glutaminase 2 (liver, mitochondrial)"
215280	0.44867	29.526	0.55479	0.80873	0.41867	0.99999	Wipf1	"WAS/WASL interacting protein family, member 1"
74777	0.49206	24.026	0.60854	0.80859	0.41875	0.99999	Selenon	selenoprotein N
80708	0.36822	50.21	0.4554	0.80858	0.41876	0.99999	Pacsin3	protein kinase C and casein kinase substrate in neurons 3
68920	-0.52308	23.182	0.64701	-0.80847	0.41882	0.99999	1110065P20Rik	RIKEN cDNA 1110065P20 gene
67952	-0.22075	394.87	0.27319	-0.80804	0.41906	0.99999	Tomm20	translocase of outer mitochondrial membrane 20
64658	-0.52254	20.748	0.64744	-0.80709	0.41962	0.99999	Mrps25	mitochondrial ribosomal protein S25
12361	0.66388	12.263	0.82292	0.80673	0.41982	0.99999	Cask	calcium/calmodulin-dependent serine protein kinase (MAGUK family)
93742	0.42296	38.433	0.52489	0.80581	0.42035	0.99999	Pard3	par-3 family cell polarity regulator
100503353	1.8264	2.2718	2.2671	0.8056	0.42047	0.99999	Gm14440	predicted gene 14440
224090	1.1496	4.0081	1.4276	0.80528	0.42066	0.99999	Tmem44	transmembrane protein 44
105853	-0.81242	8.9531	1.0093	-0.80492	0.42086	0.99999	Mal2	"mal, T cell differentiation protein 2"
11772	-0.43892	34.17	0.54549	-0.80464	0.42103	0.99999	Ap2a2	"adaptor-related protein complex 2, alpha 2 subunit"
60365	-0.33535	66.204	0.41695	-0.8043	0.42122	0.99999	Rbm8a	RNA binding motif protein 8a
67712	0.33107	62.547	0.41163	0.80429	0.42123	0.99999	Slc25a37	"solute carrier family 25, member 37"
101831	-0.73276	10.013	0.91114	-0.80422	0.42127	0.99999	Faap24	Fanconi anemia core complex associated protein 24
53323	-0.2659	166.27	0.33069	-0.80408	0.42135	0.99999	Ube2k	ubiquitin-conjugating enzyme E2K
13830	0.34672	59.948	0.43165	0.80324	0.42184	0.99999	Stom	stomatin
66855	0.24343	160.79	0.30313	0.80303	0.42195	0.99999	Tcf25	transcription factor 25 (basic helix-loop-helix)
56208	-0.28466	94.458	0.35454	-0.8029	0.42203	0.99999	Becn1	"beclin 1, autophagy related"
382406	0.57279	16.771	0.71348	0.80281	0.42208	0.99999	Poc1b	POC1 centriolar protein B
237500	0.44134	30.019	0.54992	0.80257	0.42223	0.99999	Tmtc3	transmembrane and tetratricopeptide repeat containing 3
30853	-0.23975	219.27	0.29875	-0.80251	0.42226	0.99999	Mlf2	myeloid leukemia factor 2
60367	0.28122	114.3	0.35068	0.80193	0.4226	0.99999	Il1rapl2	interleukin 1 receptor accessory protein-like 2
268566	0.56714	735.49	0.70725	0.80189	0.42262	0.99999	Gphn	gephyrin
16534	-0.31784	94.705	0.39637	-0.80188	0.42262	0.99999	Kcnn4	"potassium intermediate/small conductance calcium-activated channel, subfamily N, member 4"
26431	0.34205	58.32	0.42668	0.80164	0.42276	0.99999	Git2	GIT ArfGAP 2
69941	-0.73261	9.986	0.91409	-0.80146	0.42287	0.99999	2810408I11Rik	RIKEN cDNA 2810408I11 gene
19735	-1.3697	4.4474	1.7097	-0.80115	0.42305	0.99999	Rgs2	regulator of G-protein signaling 2
16691	-0.18158	1119.4	0.22677	-0.80075	0.42328	0.99999	Krt8	keratin 8
72061	0.39714	44.607	0.49622	0.80034	0.42351	0.99999	Aopep	aminopeptidase O
68810	-0.7961	10.232	0.99526	-0.79989	0.42377	0.99999	Nexn	nexilin
74377	1.5908	2.0026	1.9891	0.79976	0.42385	0.99999	Hsf2bp	heat shock transcription factor 2 binding protein
23863	1.5908	2.0026	1.9891	0.79976	0.42385	0.99999	Dand5	"DAN domain family member 5, BMP antagonist"
12988	0.3345	68.852	0.41826	0.79974	0.42386	0.99999	Csk	c-src tyrosine kinase
110920	0.46041	27.242	0.57571	0.79973	0.42386	0.99999	Hspa13	"heat shock protein 70 family, member 13"
14385	0.70622	10.508	0.88311	0.7997	0.42389	0.99999	Slc37a4	"solute carrier family 37 (glucose-6-phosphate transporter), member 4"
270192	0.70622	10.508	0.88311	0.7997	0.42389	0.99999	Rab6b	"RAB6B, member RAS oncogene family"
269424	-0.56065	17.962	0.70139	-0.79934	0.4241	0.99999	Jade1	jade family PHD finger 1
269338	0.57062	20.468	0.71443	0.7987	0.42446	0.99999	Vps39	VPS39 HOPS complex subunit
217737	-0.2666	136.9	0.33387	-0.79852	0.42457	0.99999	Ahsa1	"AHA1, activator of heat shock protein ATPase 1"
22335	-0.22466	242.93	0.28145	-0.79821	0.42475	0.99999	Vdac3	voltage-dependent anion channel 3
22275	0.41174	36.012	0.5161	0.79779	0.42499	0.99999	Urod	uroporphyrinogen decarboxylase
16859	0.57655	16.746	0.72275	0.79773	0.42503	0.99999	Lgals9	"lectin, galactose binding, soluble 9"
20321	-0.43082	31.752	0.54012	-0.79764	0.42508	0.99999	Frrs1	ferric-chelate reductase 1
69051	-0.35111	55.302	0.44046	-0.79715	0.42536	0.99999	Pycr2	"pyrroline-5-carboxylate reductase family, member 2"
51797	-0.30214	77.771	0.37907	-0.79705	0.42542	0.99999	Ctps	cytidine 5'-triphosphate synthase
20869	0.30221	90.408	0.37921	0.79696	0.42548	0.99999	Stk11	serine/threonine kinase 11
72080	-0.4864	25.296	0.61039	-0.79686	0.42553	0.99999	Sapcd2	suppressor APC domain containing 2
100041953	-0.22871	214.3	0.28713	-0.79654	0.42572	0.99999	Sap18b	Sin3-associated polypeptide 18B
12850	-0.41234	36.751	0.51806	-0.79592	0.42608	0.99999	Coq7	demethyl-Q 7
227197	-0.32497	63.771	0.40865	-0.79523	0.42648	0.99999	Ndufs1	NADH:ubiquinone oxidoreductase core subunit S1
17448	-0.22532	377.28	0.28335	-0.79519	0.4265	0.99999	Mdh2	"malate dehydrogenase 2, NAD (mitochondrial)"
338352	0.60966	14.525	0.76674	0.79513	0.42654	0.99999	Nell1	NEL-like 1
83965	0.57717	16.752	0.72609	0.79491	0.42667	0.99999	Enpp5	ectonucleotide pyrophosphatase/phosphodiesterase 5
67228	0.64719	16.08	0.81425	0.79483	0.42671	0.99999	Dph7	diphthamine biosynethesis 7
56530	0.34188	58.333	0.43018	0.79473	0.42677	0.99999	Cnpy2	canopy FGF signaling regulator 2
238076	0.85246	7.0007	1.0735	0.79408	0.42715	0.99999	Kcns3	"potassium voltage-gated channel, delayed-rectifier, subfamily S, member 3"
66075	-0.32646	67.834	0.41125	-0.79381	0.42731	0.99999	Chchd3	coiled-coil-helix-coiled-coil-helix domain containing 3
192232	0.61195	14.485	0.77115	0.79356	0.42745	0.99999	Hps4	"HPS4, biogenesis of lysosomal organelles complex 3 subunit 2"
71435	0.33511	59.73	0.42232	0.79351	0.42748	0.99999	Arhgap21	Rho GTPase activating protein 21
83409	-0.33541	65.14	0.42294	-0.79305	0.42775	0.99999	Lamtor2	"late endosomal/lysosomal adaptor, MAPK and MTOR activator 2"
52717	0.37423	45.317	0.47189	0.79303	0.42776	0.99999	Anapc16	anaphase promoting complex subunit 16
67070	-0.30602	74.478	0.38615	-0.79248	0.42808	0.99999	Lsm14a	LSM14A mRNA processing body assembly factor
20444	0.46734	26.803	0.58978	0.7924	0.42813	0.99999	St3gal2	"ST3 beta-galactoside alpha-2,3-sialyltransferase 2"
17231	-0.83939	9.8193	1.0606	-0.79143	0.42869	0.99999	Mcpt8	mast cell protease 8
16835	0.30388	195.77	0.38405	0.79125	0.4288	0.99999	Ldlr	low density lipoprotein receptor
16526	0.47503	32.86	0.60035	0.79125	0.4288	0.99999	Kcnk2	"potassium channel, subfamily K, member 2"
208943	0.63843	12.762	0.80691	0.79121	0.42882	0.99999	Myo5c	myosin VC
72106	-0.65144	12.243	0.82405	-0.79054	0.42921	0.99999	Jmjd8	jumonji domain containing 8
234915	-1.1286	3.9833	1.4278	-0.79046	0.42926	0.99999	Cep126	centrosomal protein 126
77053	0.3319	60.226	0.42	0.79023	0.42939	0.99999	Sun1	Sad1 and UNC84 domain containing 1
66420	0.27149	184.94	0.34358	0.79018	0.42942	0.99999	Polr2e	polymerase (RNA) II (DNA directed) polypeptide E
27399	0.39977	37.015	0.50596	0.79013	0.42945	0.99999	Ip6k1	inositol hexaphosphate kinase 1
17904	0.18633	1006.5	0.23585	0.79003	0.42951	0.99999	Myl6	"myosin, light polypeptide 6, alkali, smooth muscle and non-muscle"
26433	0.30728	72.005	0.38913	0.78966	0.42973	0.99999	Plod3	"procollagen-lysine, 2-oxoglutarate 5-dioxygenase 3"
227210	-0.46722	26.283	0.59179	-0.7895	0.42982	0.99999	Ccnyl1	cyclin Y-like 1
107435	-0.3079	71.758	0.39002	-0.78944	0.42985	0.99999	Hat1	histone aminotransferase 1
72900	-0.28556	99.611	0.36184	-0.78919	0.43	0.99999	Ndufv2	NADH:ubiquinone oxidoreductase core subunit V2
67676	-0.44831	32.064	0.5684	-0.78873	0.43027	0.99999	Rpp21	ribonuclease P 21 subunit
74112	0.39714	38.744	0.50355	0.78869	0.43029	0.99999	Usp16	ubiquitin specific peptidase 16
18015	0.57724	16.733	0.73211	0.78847	0.43042	0.99999	Nf1	neurofibromin 1
22260	0.3559	52.234	0.45147	0.78832	0.43051	0.99999	Nr1h2	"nuclear receptor subfamily 1, group H, member 2"
72475	0.4172	33.758	0.5296	0.78775	0.43084	0.99999	Ssbp3	single-stranded DNA binding protein 3
16796	-0.25426	192.56	0.32288	-0.78747	0.43101	0.99999	Lasp1	LIM and SH3 protein 1
20304	-1.2028	32.867	1.5278	-0.7873	0.43111	0.99999	Ccl5	chemokine (C-C motif) ligand 5
12343	-0.2809	109.4	0.35691	-0.78704	0.43126	0.99999	Capza2	"capping protein (actin filament) muscle Z-line, alpha 2"
73212	-0.45622	30.307	0.57994	-0.78667	0.43148	0.99999	3110082I17Rik	RIKEN cDNA 3110082I17 gene
331026	-0.70041	13.818	0.89063	-0.78642	0.43162	0.99999	Gmppb	GDP-mannose pyrophosphorylase B
56384	-0.37914	43.284	0.48227	-0.78616	0.43177	0.99999	Letm1	leucine zipper-EF-hand containing transmembrane protein 1
66148	-0.56357	16.762	0.71687	-0.78616	0.43178	0.99999	Dnajc15	DnaJ heat shock protein family (Hsp40) member C15
56309	0.57949	19.315	0.73734	0.78592	0.43191	0.99999	Mycbp	MYC binding protein
22278	-0.34707	51.233	0.44167	-0.78583	0.43197	0.99999	Usf1	upstream transcription factor 1
20530	0.67163	12.255	0.8548	0.78571	0.43204	0.99999	Slc31a2	"solute carrier family 31, member 2"
72128	1.1458	4.0215	1.4583	0.7857	0.43204	0.99999	2610008E11Rik	RIKEN cDNA 2610008E11 gene
78829	0.38178	52.39	0.48595	0.78565	0.43208	0.99999	Tsc22d4	"TSC22 domain family, member 4"
22601	0.30003	81.355	0.38207	0.78528	0.43229	0.99999	Yap1	yes-associated protein 1
211548	-0.34953	51.257	0.44548	-0.78462	0.43268	0.99999	Nomo1	nodal modulator 1
22422	-0.28913	83.489	0.36871	-0.78415	0.43295	0.99999	Wnt7b	"wingless-type MMTV integration site family, member 7B"
66471	-0.23994	165.44	0.306	-0.78412	0.43297	0.99999	Anp32e	"acidic (leucine-rich) nuclear phosphoprotein 32 family, member E"
14431	0.63999	12.773	0.81653	0.78379	0.43317	0.99999	Gamt	guanidinoacetate methyltransferase
13385	1.0152	5.9706	1.2955	0.78361	0.43327	0.99999	Dlg4	discs large MAGUK scaffold protein 4
66480	-0.17868	876.57	0.22816	-0.78315	0.43354	0.99999	Rpl15	ribosomal protein L15
11847	0.77073	8.7555	0.98454	0.78284	0.43372	0.99999	Arg2	arginase type II
97541	0.22434	300.81	0.28659	0.7828	0.43374	0.99999	Qars	glutaminyl-tRNA synthetase
73690	-1.573	1.9905	2.01	-0.78258	0.43387	0.99999	Glipr1	GLI pathogenesis-related 1 (glioma)
66168	0.31831	77.151	0.40677	0.78255	0.43389	0.99999	Grina	"glutamate receptor, ionotropic, N-methyl D-aspartate-associated protein 1 (glutamate binding)"
74691	-0.69451	28.721	0.8875	-0.78255	0.43389	0.99999	Tdrd9	tudor domain containing 9
229512	-0.2877	86.779	0.3679	-0.78201	0.43421	0.99999	Smg5	"Smg-5 homolog, nonsense mediated mRNA decay factor (C. elegans)"
22273	-0.20621	304.87	0.26373	-0.78193	0.43426	0.99999	Uqcrc1	ubiquinol-cytochrome c reductase core protein 1
56212	-0.39799	35.996	0.50909	-0.78178	0.43435	0.99999	Rhog	ras homolog family member G
116748	-0.72173	11.3	0.92324	-0.78174	0.43437	0.99999	Lsm10	U7 snRNP-specific Sm-like protein LSM10
59042	0.27007	117.92	0.34587	0.78084	0.4349	0.99999	Cope	"coatomer protein complex, subunit epsilon"
20084	0.28712	103.37	0.36775	0.78074	0.43496	0.99999	Rps18	ribosomal protein S18
75734	-0.25971	117.2	0.33265	-0.78073	0.43496	0.99999	Mff	mitochondrial fission factor
21873	-0.30731	69.509	0.39388	-0.78021	0.43527	0.99999	Tjp2	tight junction protein 2
76478	-0.39891	36.012	0.51133	-0.78015	0.4353	0.99999	Haus8	"4HAUS augmin-like complex, subunit 8"
11535	-0.77179	9.4575	0.99013	-0.77949	0.43569	0.99999	Adm	adrenomedullin
14976	-0.31539	68.061	0.40475	-0.77922	0.43585	0.99999	Pfdn6	prefoldin subunit 6
21453	-0.4315	30.023	0.55389	-0.77904	0.43595	0.99999	Tcof1	treacle ribosome biogenesis factor 1
63873	0.46235	27.212	0.5935	0.77903	0.43596	0.99999	Trpv4	"transient receptor potential cation channel, subfamily V, member 4"
193736	0.47834	24.546	0.61444	0.77849	0.43628	0.99999	Zbtb12	zinc finger and BTB domain containing 12
66929	-0.31003	83.15	0.39831	-0.77837	0.43635	0.99999	Asf1b	anti-silencing function 1B histone chaperone
78885	0.54128	17.744	0.69602	0.77768	0.43676	0.99999	Coro7	coronin 7
67037	-0.32638	101.8	0.41978	-0.7775	0.43686	0.99999	Pmf1	polyamine-modulated factor 1
27214	-0.28229	93.191	0.36313	-0.77738	0.43693	0.99999	Dbf4	DBF4 zinc finger
68479	-0.45046	27.259	0.57985	-0.77686	0.43724	0.99999	Phf5a	PHD finger protein 5A
68379	0.34726	51.056	0.44709	0.7767	0.43733	0.99999	Ciz1	CDKN1A interacting zinc finger protein 1
66624	-0.27849	106.86	0.35863	-0.77654	0.43743	0.99999	Spcs2	signal peptidase complex subunit 2 homolog (S. cerevisiae)
20677	0.31868	79.949	0.41051	0.77631	0.43756	0.99999	Sox4	SRY (sex determining region Y)-box 4
54381	0.91348	5.7578	1.1768	0.77624	0.43761	0.99999	Cpq	carboxypeptidase Q
64660	-0.31571	67.978	0.40679	-0.77611	0.43768	0.99999	Mrps24	mitochondrial ribosomal protein S24
100503890	-0.60123	14.527	0.77511	-0.77567	0.43794	0.99999	Pet100	PET100 homolog
22262	0.91189	5.7525	1.1765	0.77506	0.4383	0.99999	Uox	urate oxidase
21335	-0.22715	199.65	0.29308	-0.77503	0.43832	0.99999	Tacc3	"transforming, acidic coiled-coil containing protein 3"
216161	0.40433	34.78	0.52181	0.77486	0.43842	0.99999	Sbno2	strawberry notch 2
170716	0.61499	13.261	0.79397	0.77458	0.43859	0.99999	Cyp4f13	"cytochrome P450, family 4, subfamily f, polypeptide 13"
238330	0.37913	45.221	0.48955	0.77443	0.43867	0.99999	Irf2bpl	interferon regulatory factor 2 binding protein-like
53379	-0.19109	971.9	0.24681	-0.77425	0.43878	0.99999	Hnrnpa2b1	heterogeneous nuclear ribonucleoprotein A2/B1
76614	-0.31857	119.61	0.41148	-0.7742	0.43881	0.99999	Immt	"inner membrane protein, mitochondrial"
66978	0.32735	67.417	0.42292	0.77402	0.43892	0.99999	Luc7l	Luc7-like
227102	-0.58026	15.007	0.74991	-0.77376	0.43907	0.99999	Ormdl1	ORM1-like 1 (S. cerevisiae)
71909	-0.58026	15.007	0.74991	-0.77376	0.43907	0.99999	Haus5	"HAUS augmin-like complex, subunit 5"
73830	-0.22985	231.54	0.29705	-0.77375	0.43908	0.99999	Eif3k	"eukaryotic translation initiation factor 3, subunit K"
19018	-0.34252	54.555	0.44271	-0.77368	0.43912	0.99999	Scand1	SCAN domain-containing 1
109900	-0.36043	45.776	0.46592	-0.77358	0.43918	0.99999	Asl	argininosuccinate lyase
192287	0.48965	22.753	0.63298	0.77357	0.43918	0.99999	Slc25a36	"solute carrier family 25, member 36"
59003	-0.27019	99.527	0.34941	-0.77326	0.43937	0.99999	Maea	macrophage erythroblast attacher
16453	0.61583	13.247	0.79695	0.77273	0.43968	0.99999	Jak3	Janus kinase 3
216848	0.27979	96.005	0.36239	0.77206	0.44008	0.99999	Chd3	chromodomain helicase DNA binding protein 3
13063	-0.38695	41.06	0.50124	-0.77199	0.44012	0.99999	Cycs	"cytochrome c, somatic"
27681	-0.34255	52.29	0.44373	-0.77198	0.44013	0.99999	Snf8	"SNF8, ESCRT-II complex subunit, homolog (S. cerevisiae)"
12070	-0.22479	198.37	0.29123	-0.77185	0.4402	0.99999	Bex3	brain expressed X-linked 3
13121	-0.28989	96.808	0.37584	-0.77131	0.44052	0.99999	Cyp51	"cytochrome P450, family 51"
26370	-0.46122	25.016	0.59799	-0.77128	0.44054	0.99999	Cetn2	centrin 2
14231	0.91577	5.7444	1.1877	0.77102	0.4407	0.99999	Fkbp7	FK506 binding protein 7
51793	0.37609	49.705	0.48796	0.77073	0.44087	0.99999	Ddah2	dimethylarginine dimethylaminohydrolase 2
16923	0.44856	37.902	0.58206	0.77064	0.44092	0.99999	Sh2b3	SH2B adaptor protein 3
11792	-0.27204	131.73	0.35302	-0.77062	0.44093	0.99999	Apex1	apurinic/apyrimidinic endonuclease 1
66977	-0.36049	49.836	0.46788	-0.77048	0.44101	0.99999	Nuf2	"NUF2, NDC80 kinetochore complex component"
68048	-0.50366	23.064	0.6538	-0.77036	0.44108	0.99999	Aen	apoptosis enhancing nuclease
108067	-0.46911	26.308	0.60902	-0.77027	0.44114	0.99999	Eif2b3	"eukaryotic translation initiation factor 2B, subunit 3"
208501	-0.51957	19.529	0.67484	-0.76992	0.44135	0.99999	Ndufaf8	NADH:ubiquinone oxidoreductase complex assembly factor 8
101476	-0.46036	24.981	0.59794	-0.76991	0.44135	0.99999	Plekha1	"pleckstrin homology domain containing, family A (phosphoinositide binding specific) member 1"
18483	0.36579	44.467	0.47539	0.76945	0.44163	0.99999	Palm	paralemmin
13865	0.70789	10.538	0.92027	0.76922	0.44176	0.99999	Nr2f1	"nuclear receptor subfamily 2, group F, member 1"
232227	-0.51609	19.469	0.67107	-0.76906	0.44186	0.99999	Iqsec1	IQ motif and Sec7 domain 1
67689	0.72378	9.2464	0.94149	0.76875	0.44204	0.99999	Aldh3b1	"aldehyde dehydrogenase 3 family, member B1"
68943	0.61762	14.527	0.80341	0.76875	0.44204	0.99999	Pink1	PTEN induced putative kinase 1
66585	-0.33389	69.151	0.43435	-0.76869	0.44208	0.99999	Snrnp40	small nuclear ribonucleoprotein 40 (U5)
170767	-0.43267	29.98	0.56303	-0.76848	0.4422	0.99999	Rfxap	regulatory factor X-associated protein
66491	-0.48711	22.276	0.63418	-0.76809	0.44243	0.99999	Polr2l	polymerase (RNA) II (DNA directed) polypeptide L
27984	-0.28027	85.975	0.36526	-0.76731	0.44289	0.99999	Efhd2	EF hand domain containing 2
14012	-0.50361	19.984	0.6577	-0.76572	0.44384	0.99999	Mpzl2	myelin protein zero-like 2
16210	-0.62355	12.728	0.81455	-0.76551	0.44397	0.99999	Impact	"impact, RWD domain protein"
232791	-0.36022	49.842	0.47062	-0.76542	0.44402	0.99999	Cnot3	"CCR4-NOT transcription complex, subunit 3"
67196	-0.41383	32.768	0.54073	-0.76531	0.44409	0.99999	Ube2t	ubiquitin-conjugating enzyme E2T
18141	-0.4752	22.748	0.62102	-0.76519	0.44416	0.99999	Nup50	nucleoporin 50
50529	-0.41806	31.013	0.54672	-0.76467	0.44447	0.99999	Mrps7	mitchondrial ribosomal protein S7
215160	0.79347	7.5129	1.0378	0.76459	0.44452	0.99999	Rhbdd2	rhomboid domain containing 2
19682	0.49242	21.017	0.64424	0.76434	0.44467	0.99999	Rdh5	retinol dehydrogenase 5
114641	-0.22353	855.83	0.29261	-0.76392	0.44491	0.99999	Rpl31	ribosomal protein L31
54613	0.4934	21.009	0.64617	0.76358	0.44512	0.99999	St3gal6	"ST3 beta-galactoside alpha-2,3-sialyltransferase 6"
110109	-0.33922	72.681	0.44443	-0.76327	0.4453	0.99999	Nop2	NOP2 nucleolar protein
21769	0.37351	41.733	0.48944	0.76314	0.44538	0.99999	Zfand3	"zinc finger, AN1-type domain 3"
18451	0.33492	73.091	0.43914	0.76268	0.44565	0.99999	P4ha1	"procollagen-proline, 2-oxoglutarate 4-dioxygenase (proline 4-hydroxylase), alpha 1 polypeptide"
68971	-0.47464	27.589	0.62236	-0.76264	0.44568	0.99999	Tamm41	TAM41 mitochondrial translocator assembly and maintenance homolog
20438	-0.52711	21.937	0.69145	-0.76233	0.44586	0.99999	Siah1b	siah E3 ubiquitin protein ligase 1B
53869	0.23814	158.66	0.31263	0.76174	0.44621	0.99999	Rab11a	"RAB11A, member RAS oncogene family"
380928	-0.67633	11.698	0.88887	-0.76088	0.44673	0.99999	Lmo7	LIM domain only 7
14107	-0.36739	42.453	0.48286	-0.76086	0.44674	0.99999	Fat1	FAT atypical cadherin 1
77963	-0.60246	13.246	0.79252	-0.76018	0.44714	0.99999	Hook1	hook microtubule tethering protein 1
11848	0.19401	366.45	0.25567	0.75883	0.44795	0.99999	Rhoa	ras homolog family member A
76306	-1.146	4.0241	1.5104	-0.75877	0.44799	0.99999	Slc18b1	"solute carrier family 18, subfamily B, member 1"
641376	-0.48328	22.209	0.63714	-0.75852	0.44814	0.99999	Tomm40l	translocase of outer mitochondrial membrane 40-like
73724	-0.71128	9.2524	0.93792	-0.75835	0.44824	0.99999	Mcee	methylmalonyl CoA epimerase
192185	-0.26417	108.08	0.34841	-0.75821	0.44832	0.99999	Nadk	NAD kinase
381549	1.1771	3.2561	1.5526	0.75812	0.44838	0.99999	Zfp69	zinc finger protein 69
70225	-0.34472	50.028	0.45483	-0.75792	0.4485	0.99999	Ppil3	peptidylprolyl isomerase (cyclophilin)-like 3
14156	-0.34242	56.853	0.45183	-0.75786	0.44854	0.99999	Fen1	flap structure specific endonuclease 1
17311	0.67103	10.986	0.88559	0.75772	0.44862	0.99999	Kitl	kit ligand
54608	0.32326	62.21	0.42668	0.75763	0.44867	0.99999	Abhd2	abhydrolase domain containing 2
77411	-0.56167	15.495	0.74147	-0.75752	0.44874	0.99999	Esrp2	epithelial splicing regulatory protein 2
107351	-0.79526	8.206	1.0498	-0.75751	0.44875	0.99999	Kank1	KN motif and ankyrin repeat domains 1
229663	-0.23533	173.81	0.3112	-0.75621	0.44952	0.99999	Csde1	"cold shock domain containing E1, RNA binding"
78523	-0.32302	57.478	0.42725	-0.75603	0.44963	0.99999	Mrpl9	mitochondrial ribosomal protein L9
245007	0.3743	41.73	0.49511	0.75599	0.44966	0.99999	Zbtb38	zinc finger and BTB domain containing 38
27370	0.1723	2537.2	0.22798	0.75577	0.44978	0.99999	Rps26	ribosomal protein S26
76709	-0.19634	352.21	0.25982	-0.75569	0.44983	0.99999	Arpc2	"actin related protein 2/3 complex, subunit 2"
12394	0.33944	50.245	0.44945	0.75524	0.4501	0.99999	Runx1	runt related transcription factor 1
13846	0.35794	59.928	0.4741	0.75499	0.45026	0.99999	Ephb4	Eph receptor B4
140499	-0.27694	90.279	0.36688	-0.75486	0.45033	0.99999	Ube2j2	ubiquitin-conjugating enzyme E2J 2
321022	-0.23724	159.34	0.31433	-0.75477	0.45039	0.99999	Cdv3	carnitine deficiency-associated gene expressed in ventricle 3
12192	0.43014	39.625	0.57017	0.7544	0.45061	0.99999	Zfp36l1	"zinc finger protein 36, C3H type-like 1"
56748	-0.30727	79.648	0.40762	-0.7538	0.45097	0.99999	Nfu1	NFU1 iron-sulfur cluster scaffold
244713	0.50991	18.761	0.67669	0.75354	0.45113	0.99999	Zfp317	zinc finger protein 317
19046	-0.28303	84.905	0.37577	-0.75321	0.45132	0.99999	Ppp1cb	protein phosphatase 1 catalytic subunit beta
69106	0.79599	7.5236	1.0572	0.75293	0.45149	0.99999	Stoml1	stomatin-like 1
76612	-0.90233	5.7658	1.1988	-0.75272	0.45162	0.99999	Lrrc27	leucine rich repeat containing 27
66098	-0.55906	15.511	0.74273	-0.7527	0.45163	0.99999	Chchd6	coiled-coil-helix-coiled-coil-helix domain containing 6
319638	0.64052	11.511	0.85103	0.75265	0.45166	0.99999	Nt5dc1	5'-nucleotidase domain containing 1
28106	-0.32046	58.038	0.42581	-0.75259	0.4517	0.99999	Mydgf	myeloid derived growth factor
234595	0.59256	13.773	0.78755	0.7524	0.45181	0.99999	Slc38a7	"solute carrier family 38, member 7"
216344	0.34419	47.034	0.45775	0.75192	0.4521	0.99999	Rab21	"RAB21, member RAS oncogene family"
12540	-0.20511	242.69	0.273	-0.75132	0.45246	0.99999	Cdc42	cell division cycle 42
18984	0.28836	79.352	0.3839	0.75112	0.45258	0.99999	Por	P450 (cytochrome) oxidoreductase
216033	-1.1663	3.2526	1.5533	-0.75084	0.45275	0.99999	Ctnna3	"catenin (cadherin associated protein), alpha 3"
11745	-0.18645	476.35	0.24837	-0.75071	0.45283	0.99999	Anxa3	annexin A3
20637	-0.19944	295.87	0.26577	-0.75043	0.453	0.99999	Snrnp70	small nuclear ribonucleoprotein 70 (U1)
224079	1.1798	3.2614	1.5726	0.7502	0.45313	0.99999	Atp13a4	ATPase type 13A4
22630	-0.19864	282.94	0.26484	-0.75002	0.45324	0.99999	Ywhaq	tyrosine 3-monooxygenase/tryptophan 5-monooxygenase activation protein theta
57138	2.0108	1.2478	2.6826	0.74956	0.45352	0.99999	Slc12a5	"solute carrier family 12, member 5"
269854	2.0108	1.2478	2.6826	0.74956	0.45352	0.99999	Nat14	N-acetyltransferase 14
277360	2.0108	1.2478	2.6826	0.74956	0.45352	0.99999	Prex1	"phosphatidylinositol-3,4,5-trisphosphate-dependent Rac exchange factor 1"
66410	0.45156	25.976	0.60283	0.74907	0.45382	0.99999	Mterf3	mitochondrial transcription termination factor 3
17295	-0.3864	35.238	0.51591	-0.74897	0.45387	0.99999	Met	met proto-oncogene
104303	0.2559	107.23	0.34184	0.74859	0.4541	0.99999	Arl1	ADP-ribosylation factor-like 1
107260	-0.25972	112.84	0.34712	-0.7482	0.45434	0.99999	Otub1	"OTU domain, ubiquitin aldehyde binding 1"
16656	-1.1622	3.2444	1.5533	-0.74819	0.45435	0.99999	Hivep3	human immunodeficiency virus type I enhancer binding protein 3
66117	-0.43683	29.424	0.5839	-0.74811	0.45439	0.99999	Fmc1	formation of mitochondrial complex V assembly factor 1
14083	0.32675	119.88	0.43692	0.74785	0.45455	0.99999	Ptk2	PTK2 protein tyrosine kinase 2
67581	0.48209	21.484	0.64485	0.7476	0.4547	0.99999	Tbc1d23	"TBC1 domain family, member 23"
66234	-0.26783	159.51	0.3585	-0.74709	0.45501	0.99999	Msmo1	methylsterol monoxygenase 1
66488	-0.36072	41.769	0.48295	-0.74691	0.45512	0.99999	Fam136a	"family with sequence similarity 136, member A"
14660	-0.30844	73.888	0.41303	-0.74676	0.45521	0.99999	Gls	glutaminase
21887	0.40444	33.036	0.54162	0.74671	0.45524	0.99999	Tle3	transducin-like enhancer of split 3
16865	-0.37082	38.514	0.49666	-0.74663	0.45528	0.99999	Eif2d	eukaryotic translation initiation factor 2D
27260	-0.77891	7.4887	1.0433	-0.74659	0.45531	0.99999	Plek2	pleckstrin 2
68241	-0.56473	15.519	0.75664	-0.74637	0.45544	0.99999	Mcrip2	MAPK regulated corepressor interacting protein 2
108689	-0.35034	47.283	0.46948	-0.74621	0.45554	0.99999	Stn1	"STN1, CST complex subunit"
26397	-0.26864	103.87	0.36	-0.7462	0.45554	0.99999	Map2k3	mitogen-activated protein kinase kinase 3
74617	0.30567	101.76	0.40972	0.74605	0.45564	0.99999	Scpep1	serine carboxypeptidase 1
54124	-0.22129	336.83	0.29669	-0.74586	0.45575	0.99999	Cks1b	CDC28 protein kinase 1b
76820	1.9975	1.2559	2.6783	0.74579	0.4558	0.99999	Fam49a	"family with sequence similarity 49, member A"
18968	-0.47356	22.705	0.63522	-0.74551	0.45596	0.99999	Pola1	"polymerase (DNA directed), alpha 1"
233571	1.1845	3.2479	1.5898	0.74505	0.45624	0.99999	P2ry6	"pyrimidinergic receptor P2Y, G-protein coupled, 6"
98417	-0.34679	53.603	0.4658	-0.7445	0.45657	0.99999	Cnih4	cornichon family AMPA receptor auxiliary protein 4
22210	0.22028	200.4	0.29598	0.74426	0.45672	0.99999	Ube2b	ubiquitin-conjugating enzyme E2B
16373	0.91828	5.7309	1.2339	0.7442	0.45676	0.99999	Irx3	Iroquois related homeobox 3
14313	-1.9975	1.2462	2.6844	-0.74412	0.45681	0.99999	Fst	follistatin
16341	0.1867	376.53	0.2509	0.74411	0.45681	0.99999	Eif3e	"eukaryotic translation initiation factor 3, subunit E"
217684	0.49645	20.984	0.66725	0.74402	0.45686	0.99999	Susd6	sushi domain containing 6
70382	0.61711	12.007	0.8297	0.74378	0.45701	0.99999	Kctd2	potassium channel tetramerisation domain containing 2
74351	-0.33796	48.771	0.45479	-0.74313	0.45741	0.99999	Ddx23	DEAD (Asp-Glu-Ala-Asp) box polypeptide 23
218973	-0.4327	26.512	0.5825	-0.74284	0.45758	0.99999	Wdhd1	WD repeat and HMG-box DNA binding protein 1
208146	0.49194	21.049	0.66227	0.74282	0.45759	0.99999	Yeats2	YEATS domain containing 2
20516	0.33684	48.029	0.45413	0.74173	0.45825	0.99999	Slc20a2	"solute carrier family 20, member 2"
69635	-1.9888	1.2516	2.6816	-0.74167	0.45829	0.99999	Dapk1	death associated protein kinase 1
77777	0.3754	43.418	0.50631	0.74144	0.45843	0.99999	Ulbp1	UL16 binding protein 1
67224	-0.51742	18.272	0.69809	-0.7412	0.45857	0.99999	Med29	mediator complex subunit 29
71371	0.57756	16.695	0.77954	0.74089	0.45876	0.99999	Arid5b	AT rich interactive domain 5B (MRF1-like)
69694	0.33291	55.19	0.44936	0.74086	0.45878	0.99999	Tatdn1	TatD DNase domain containing 1
234371	0.35747	57.172	0.48303	0.74005	0.45927	0.99999	Tmem161a	transmembrane protein 161A
57750	-0.43657	30.024	0.59031	-0.73956	0.45957	0.99999	Wdr12	WD repeat domain 12
14420	0.49735	19.241	0.67275	0.73927	0.45974	0.99999	Galc	galactosylceramidase
22404	-0.22786	188.15	0.30829	-0.7391	0.45985	0.99999	Wiz	widely-interspaced zinc finger motifs
74414	-0.3984	32.533	0.53927	-0.73878	0.46004	0.99999	Polr3c	polymerase (RNA) III (DNA directed) polypeptide C
100862468	-0.30147	73.864	0.40815	-0.73862	0.46014	0.99999	LOC100862468	NHP2-like protein 1
83796	-0.33297	49.278	0.45091	-0.73843	0.46025	0.99999	Smarcd2	"SWI/SNF related, matrix associated, actin dependent regulator of chromatin, subfamily d, member 2"
67210	-0.25381	117.12	0.34396	-0.7379	0.46057	0.99999	Gatad1	GATA zinc finger domain containing 1
52535	-0.53002	23.907	0.71831	-0.73786	0.4606	0.99999	Mettl17	methyltransferase like 17
214048	-0.51892	19.448	0.70428	-0.73682	0.46123	0.99999	Larp1b	"La ribonucleoprotein domain family, member 1B"
69185	0.46663	22.018	0.63338	0.73674	0.46128	0.99999	Dtwd1	DTW domain containing 1
19200	0.61721	11.988	0.83791	0.7366	0.46136	0.99999	Pstpip1	proline-serine-threonine phosphatase-interacting protein 1
226043	-0.4762	22.711	0.64684	-0.7362	0.46161	0.99999	Cbwd1	COBW domain containing 1
12182	-1.158	3.2363	1.5734	-0.736	0.46173	0.99999	Bst1	bone marrow stromal cell antigen 1
67963	0.25749	140.38	0.35037	0.73491	0.4624	0.99999	Npc2	NPC intracellular cholesterol transporter 2
53625	0.29896	69.107	0.40712	0.73433	0.46275	0.99999	B3gnt2	"UDP-GlcNAc:betaGal beta-1,3-N-acetylglucosaminyltransferase 2"
68043	-0.40693	33.825	0.55419	-0.73427	0.46278	0.99999	Eef1akmt1	EEF1A alpha lysine methyltransferase 1
19253	-0.62786	11.487	0.85549	-0.73392	0.46299	0.99999	Ptpn18	"protein tyrosine phosphatase, non-receptor type 18"
67972	0.36421	58.587	0.49658	0.73345	0.46329	0.99999	Atp2b1	"ATPase, Ca++ transporting, plasma membrane 1"
101985	0.43669	25.282	0.59555	0.73325	0.4634	0.99999	Usb1	U6 snRNA biogenesis 1
70248	0.20695	209.04	0.28236	0.73292	0.46361	0.99999	Dazap1	DAZ associated protein 1
67778	-0.34745	43.254	0.47408	-0.7329	0.46362	0.99999	Zfp639	zinc finger protein 639
14615	-0.44269	26.048	0.6042	-0.73268	0.46375	0.99999	Gjc1	"gap junction protein, gamma 1"
23806	0.34507	51.413	0.47104	0.73258	0.46382	0.99999	Arih1	ariadne RBR E3 ubiquitin protein ligase 1
66483	-0.1811	616.39	0.24722	-0.73255	0.46383	0.99999	Rpl36al	ribosomal protein L36A-like
27966	-0.32017	60.819	0.43728	-0.7322	0.46405	0.99999	Rrp9	"RRP9, small subunit (SSU) processome component, homolog (yeast)"
27267	-0.35359	92.119	0.48304	-0.73201	0.46416	0.99999	Cars	cysteinyl-tRNA synthetase
83486	0.28876	87.365	0.39464	0.73171	0.46435	0.99999	Rbm5	RNA binding motif protein 5
66614	-0.37728	44.345	0.51566	-0.73165	0.46438	0.99999	Gpatch4	G patch domain containing 4
108000	-0.44478	24.228	0.60795	-0.7316	0.46441	0.99999	Cenpf	centromere protein F
18709	0.36392	52.671	0.49746	0.73156	0.46444	0.99999	Pik3r2	phosphoinositide-3-kinase regulatory subunit 2
53860	-0.24486	112.25	0.335	-0.73091	0.46483	0.99999	Septin9	septin 9
56322	-0.45621	23.792	0.62434	-0.73071	0.46496	0.99999	Timm22	translocase of inner mitochondrial membrane 22
98238	-0.22847	186.9	0.31302	-0.7299	0.46545	0.99999	Lrrc59	leucine rich repeat containing 59
12566	0.32969	51.329	0.45173	0.72982	0.4655	0.99999	Cdk2	cyclin-dependent kinase 2
20775	-0.26267	123.41	0.35996	-0.72972	0.46556	0.99999	Sqle	squalene epoxidase
19122	0.3303	65.108	0.45286	0.72936	0.46578	0.99999	Prnp	prion protein
18739	0.30515	60.725	0.41844	0.72926	0.46584	0.99999	Pitpnm1	"phosphatidylinositol transfer protein, membrane-associated 1"
212168	0.4615	22.513	0.6329	0.72919	0.46588	0.99999	Zswim4	zinc finger SWIM-type containing 4
20501	-0.30917	67.196	0.42404	-0.7291	0.46594	0.99999	Slc16a1	"solute carrier family 16 (monocarboxylic acid transporters), member 1"
13805	0.38936	32.268	0.53404	0.72908	0.46595	0.99999	Eng	endoglin
20910	0.3912	33.958	0.53681	0.72875	0.46616	0.99999	Stxbp1	syntaxin binding protein 1
64451	0.37918	34.98	0.52033	0.72872	0.46617	0.99999	Dip2a	disco interacting protein 2 homolog A
20163	0.29287	87.446	0.40192	0.72868	0.4662	0.99999	Rsu1	Ras suppressor protein 1
11744	0.23727	128.82	0.32577	0.72835	0.4664	0.99999	Anxa11	annexin A11
58520	-0.41971	34.613	0.57669	-0.72779	0.46674	0.99999	Erg28	ergosterol biosynthesis 28
216867	1.5805	2.016	2.1719	0.72771	0.46679	0.99999	Slc16a11	"solute carrier family 16 (monocarboxylic acid transporters), member 11"
67125	0.26475	86.777	0.36386	0.72762	0.46684	0.99999	Tspan31	tetraspanin 31
54645	0.4485	23.007	0.6164	0.72761	0.46685	0.99999	Gripap1	GRIP1 associated protein 1
240084	0.35205	41.974	0.48395	0.72746	0.46694	0.99999	Cchcr1	coiled-coil alpha-helical rod protein 1
18016	0.31071	59.337	0.42715	0.72742	0.46697	0.99999	Nf2	neurofibromin 2
54139	-0.44525	24.282	0.61223	-0.72726	0.46707	0.99999	Irf6	interferon regulatory factor 6
67026	-0.30153	61.492	0.41468	-0.72713	0.46714	0.99999	Thap4	THAP domain containing 4
57914	0.59239	12.501	0.81509	0.72678	0.46736	0.99999	Crlf2	cytokine receptor-like factor 2
280411	0.39372	33.963	0.54217	0.7262	0.46772	0.99999	Lix1l	Lix1-like
73094	1.0173	4.5121	1.4008	0.72619	0.46772	0.99999	Sgip1	SH3-domain GRB2-like (endophilin) interacting protein 1
223527	-0.2256	172.63	0.31068	-0.72613	0.46776	0.99999	Eny2	ENY2 transcription and export complex 2 subunit
67973	-0.42113	29.293	0.58015	-0.7259	0.4679	0.99999	Mphosph10	M-phase phosphoprotein 10 (U3 small nucleolar ribonucleoprotein)
94061	-0.60566	12.014	0.8344	-0.72587	0.46792	0.99999	Mrpl1	mitochondrial ribosomal protein L1
238799	-0.30885	57.79	0.42583	-0.7253	0.46827	0.99999	Tnpo1	transportin 1
20650	0.52094	17.035	0.71843	0.7251	0.46839	0.99999	Sntb2	"syntrophin, basic 2"
225887	-0.27677	105.97	0.38186	-0.72481	0.46857	0.99999	Ndufs8	NADH:ubiquinone oxidoreductase core subunit S8
66128	-0.32812	50.254	0.45277	-0.7247	0.46864	0.99999	Mrps36	mitochondrial ribosomal protein S36
54208	-0.27239	145.14	0.37612	-0.7242	0.46895	0.99999	Arl6ip1	ADP-ribosylation factor-like 6 interacting protein 1
76574	-0.5002	21.7	0.6908	-0.72409	0.46901	0.99999	Mfsd2a	major facilitator superfamily domain containing 2A
17873	-0.48875	19.251	0.67521	-0.72385	0.46916	0.99999	Gadd45b	growth arrest and DNA-damage-inducible 45 beta
66520	-0.45936	22.017	0.63465	-0.72381	0.46918	0.99999	2610001J05Rik	RIKEN cDNA 2610001J05 gene
18569	0.69515	12.942	0.96058	0.72368	0.46926	0.99999	Pdcd4	programmed cell death 4
78330	-0.25014	101.5	0.34586	-0.72325	0.46953	0.99999	Ndufv3	NADH:ubiquinone oxidoreductase core subunit V3
231430	-0.39887	32.469	0.55167	-0.72302	0.46967	0.99999	Cox18	cytochrome c oxidase assembly protein 18
69902	-0.27798	90.215	0.38472	-0.72255	0.46995	0.99999	Mrto4	"mRNA turnover 4, ribosome maturation factor"
19166	-0.30013	64.321	0.41549	-0.72236	0.47007	0.99999	Psma2	proteasome subunit alpha 2
55944	-0.22645	150.57	0.31351	-0.72231	0.4701	0.99999	Eif3d	"eukaryotic translation initiation factor 3, subunit D"
17527	0.401	29.512	0.55546	0.72192	0.47034	0.99999	Mpv17	MpV17 mitochondrial inner membrane protein
69890	0.42277	26.264	0.58567	0.72185	0.47038	0.99999	Zfp219	zinc finger protein 219
52668	0.39175	53.32	0.54289	0.7216	0.47054	0.99999	Ifi27	"interferon, alpha-inducible protein 27"
66369	0.54838	14.747	0.76003	0.72152	0.47059	0.99999	Dus2	dihydrouridine synthase 2
68833	-0.30855	59.421	0.42778	-0.72128	0.47074	0.99999	Pdcl3	phosducin-like 3
22341	0.32294	64.372	0.44782	0.72114	0.47082	0.99999	Vegfc	vascular endothelial growth factor C
74383	-0.23575	128.84	0.32696	-0.72105	0.47088	0.99999	Ubap2l	ubiquitin-associated protein 2-like
72434	-0.54137	15.958	0.75085	-0.721	0.47091	0.99999	Lypd3	Ly6/Plaur domain containing 3
114713	0.48652	19.788	0.67481	0.72097	0.47093	0.99999	Rasa2	RAS p21 protein activator 2
66350	-0.45358	23.7	0.62916	-0.72093	0.47095	0.99999	Pla2g12a	"phospholipase A2, group XIIA"
76740	0.26178	119.32	0.36315	0.72087	0.47099	0.99999	Efr3a	EFR3 homolog A
268448	0.3688	36.037	0.51182	0.72057	0.47117	0.99999	Phf12	PHD finger protein 12
71472	0.25714	98.449	0.35689	0.7205	0.47122	0.99999	Usp19	ubiquitin specific peptidase 19
101502	-0.40861	27.979	0.5674	-0.72014	0.47144	0.99999	Hsd3b7	"hydroxy-delta-5-steroid dehydrogenase, 3 beta- and steroid delta-isomerase 7"
100608	-0.33909	51.093	0.47091	-0.72007	0.47148	0.99999	Noc4l	NOC4 like
240832	-0.28276	74.909	0.39276	-0.71992	0.47157	0.99999	Tor1aip2	torsin A interacting protein 2
227746	-0.34474	43.753	0.47981	-0.71849	0.47245	0.99999	Rabepk	Rab9 effector protein with kelch motifs
19092	0.26225	87.317	0.36513	0.71824	0.47261	0.99999	Prkg2	"protein kinase, cGMP-dependent, type II"
16852	-0.18493	7247.4	0.25751	-0.71817	0.47265	0.99999	Lgals1	"lectin, galactose binding, soluble 1"
20422	-0.27666	79.158	0.38526	-0.71809	0.4727	0.99999	Sem1	"SEM1, 26S proteasome complex subunit"
269608	0.74184	7.9822	1.0335	0.71781	0.47288	0.99999	Plekhg5	"pleckstrin homology domain containing, family G (with RhoGef domain) member 5"
102866	0.22939	133.26	0.31964	0.71764	0.47298	0.99999	Pls3	plastin 3 (T-isoform)
50932	0.34862	40.259	0.48594	0.71741	0.47312	0.99999	Mink1	misshapen-like kinase 1 (zebrafish)
11461	-0.15357	2227.9	0.21418	-0.71698	0.47338	0.99999	Actb	"actin, beta"
26558	0.38661	38.113	0.53925	0.71694	0.47341	0.99999	Homer3	homer scaffolding protein 3
68342	-0.26846	95.647	0.3747	-0.71648	0.4737	0.99999	Ndufb10	NADH:ubiquinone oxidoreductase subunit B10
381175	-0.82086	6.2294	1.1458	-0.71639	0.47375	0.99999	Ccdc68	coiled-coil domain containing 68
227622	0.7373	8.0226	1.0298	0.71596	0.47401	0.99999	Paxx	non-homologous end joining factor
18789	-0.24282	107.77	0.33925	-0.71574	0.47415	0.99999	Papola	poly (A) polymerase alpha
56176	0.46291	20.75	0.6471	0.71537	0.47438	0.99999	Pigp	"phosphatidylinositol glycan anchor biosynthesis, class P"
213053	0.34343	45.322	0.4801	0.71533	0.4744	0.99999	Slc39a14	"solute carrier family 39 (zinc transporter), member 14"
52858	-0.31072	57.793	0.43462	-0.71492	0.47466	0.99999	Cdipt	CDP-diacylglycerol--inositol 3-phosphatidyltransferase (phosphatidylinositol synthase)
237422	0.53183	15.269	0.74394	0.71489	0.47468	0.99999	Ric8b	RIC8 guanine nucleotide exchange factor B
11993	-0.25468	117.69	0.35637	-0.71467	0.47481	0.99999	Aup1	ancient ubiquitous protein 1
107508	-0.26907	105.32	0.37656	-0.71454	0.47489	0.99999	Eprs	glutamyl-prolyl-tRNA synthetase
50887	-0.40312	35.394	0.56422	-0.71448	0.47493	0.99999	Hmgn5	high-mobility group nucleosome binding domain 5
11877	0.53385	15.267	0.74721	0.71445	0.47495	0.99999	Arvcf	armadillo repeat gene deleted in velocardiofacial syndrome
18301	-0.24571	142.98	0.34421	-0.71383	0.47533	0.99999	Fxyd5	FXYD domain-containing ion transport regulator 5
231769	0.3149	51.54	0.44136	0.71347	0.47555	0.99999	Sfswap	splicing factor SWAP
13135	-0.26831	84.97	0.37614	-0.71332	0.47565	0.99999	Dad1	defender against cell death 1
68133	-0.27524	94.146	0.38586	-0.71331	0.47566	0.99999	Gcsh	glycine cleavage system protein H (aminomethyl carrier)
226646	-0.22199	149.33	0.31132	-0.71306	0.47581	0.99999	Ndufs2	NADH:ubiquinone oxidoreductase core subunit S2
319740	0.43875	23.533	0.61538	0.71297	0.47586	0.99999	Zfyve27	"zinc finger, FYVE domain containing 27"
67959	-0.25484	91.761	0.35747	-0.7129	0.47591	0.99999	Puf60	poly-U binding splicing factor 60
68147	-0.25288	148.26	0.35478	-0.71277	0.47599	0.99999	Gar1	GAR1 ribonucleoprotein
68585	0.1832	439.75	0.25706	0.71265	0.47606	0.99999	Rtn4	reticulon 4
20751	-0.34367	46.08	0.48231	-0.71255	0.47612	0.99999	Spr	sepiapterin reductase
68188	-0.28398	67.235	0.39859	-0.71245	0.47618	0.99999	Sympk	symplekin
66826	0.43073	25.714	0.60464	0.71238	0.47623	0.99999	Taz	tafazzin
71713	0.38847	32.308	0.54567	0.71191	0.47652	0.99999	Cdc40	cell division cycle 40
18577	0.70198	8.4969	0.98612	0.71187	0.47655	0.99999	Pde4a	"phosphodiesterase 4A, cAMP specific"
83962	-0.31139	55.056	0.43745	-0.71182	0.47658	0.99999	Btbd1	BTB (POZ) domain containing 1
15388	-0.18314	331.64	0.25738	-0.71157	0.47673	0.99999	Hnrnpl	heterogeneous nuclear ribonucleoprotein L
320924	0.33979	43.551	0.47757	0.7115	0.47677	0.99999	Ccbe1	collagen and calcium binding EGF domains 1
212167	0.3843	43.034	0.54021	0.71138	0.47685	0.99999	Gsap	gamma-secretase activating protein
58184	-0.32428	50.817	0.45601	-0.71114	0.477	0.99999	Cnot9	"CCR4-NOT transcription complex, subunit 9"
229658	-0.39163	31.242	0.55075	-0.7111	0.47703	0.99999	Vangl1	VANGL planar cell polarity 1
433702	-0.3274	61.66	0.46047	-0.71101	0.47708	0.99999	Ncbp1	nuclear cap binding protein subunit 1
19124	0.3409	58.603	0.47948	0.71097	0.4771	0.99999	Procr	"protein C receptor, endothelial"
57342	-0.3394	42.003	0.47743	-0.71089	0.47715	0.99999	Parva	"parvin, alpha"
67568	-0.19742	308.41	0.27772	-0.71086	0.47717	0.99999	Mrfap1	Morf4 family associated protein 1
68240	-0.27254	77.443	0.38341	-0.71083	0.47719	0.99999	Rpa3	replication protein A3
107817	-0.30618	56	0.43095	-0.71048	0.47741	0.99999	Jmjd6	jumonji domain containing 6
12261	-0.20122	247.08	0.28322	-0.71047	0.47741	0.99999	C1qbp	"complement component 1, q subcomponent binding protein"
22025	0.61972	10.754	0.87231	0.71043	0.47744	0.99999	Nr2c1	"nuclear receptor subfamily 2, group C, member 1"
102634096	1.1749	3.2749	1.6539	0.71038	0.47747	0.99999	Gm11476	predicted gene 11476
13885	-0.20104	436.78	0.28303	-0.71032	0.47751	0.99999	Esd	esterase D/formylglutathione hydrolase
11856	0.77202	6.7581	1.087	0.7102	0.47758	0.99999	Arhgap6	Rho GTPase activating protein 6
15976	0.42392	26.223	0.59714	0.70992	0.47775	0.99999	Ifnar2	interferon (alpha and beta) receptor 2
66455	0.4392	23.538	0.61893	0.70961	0.47795	0.99999	Cnpy4	canopy FGF signaling regulator 4
66048	-0.29669	62.565	0.41815	-0.70954	0.47799	0.99999	Emc6	ER membrane protein complex subunit 6
104401	0.35889	37.037	0.50594	0.70936	0.4781	0.99999	Pcnx3	pecanex homolog 3
14852	-0.23075	169.51	0.32544	-0.70903	0.4783	0.99999	Gspt1	G1 to S phase transition 1
78906	0.4427	23.505	0.62488	0.70845	0.47866	0.99999	Misp	mitotic spindle positioning
15526	-0.22408	320.37	0.31646	-0.70808	0.4789	0.99999	Hspa9	heat shock protein 9
108800	0.89833	4.9924	1.2697	0.70754	0.47923	0.99999	Ston2	stonin 2
108100	-0.27237	75.197	0.38513	-0.70721	0.47944	0.99999	Baiap2	brain-specific angiogenesis inhibitor 1-associated protein 2
17869	-0.29	127.87	0.41008	-0.70718	0.47945	0.99999	Myc	myelocytomatosis oncogene
72194	0.75237	7.9872	1.0642	0.70697	0.47959	0.99999	Fbxl20	F-box and leucine-rich repeat protein 20
12028	-0.24951	96.542	0.35317	-0.70648	0.47989	0.99999	Bax	BCL2-associated X protein
22185	-0.20467	215.08	0.29	-0.70574	0.48035	0.99999	U2af2	U2 small nuclear ribonucleoprotein auxiliary factor (U2AF) 2
74335	0.53114	15.283	0.75265	0.7057	0.48038	0.99999	Xrcc3	X-ray repair complementing defective repair in Chinese hamster cells 3
207686	0.62157	10.764	0.8808	0.70569	0.48038	0.99999	Cfap69	cilia and flagella associated protein 69
239083	-0.695	10.552	0.98494	-0.70562	0.48042	0.99999	Ccnb1ip1	cyclin B1 interacting protein 1
15205	-0.39057	50.27	0.55358	-0.70554	0.48048	0.99999	Hes1	hes family bHLH transcription factor 1
66290	-0.2237	135.27	0.31715	-0.70535	0.48059	0.99999	Atp6v1g1	"ATPase, H+ transporting, lysosomal V1 subunit G1"
70796	0.55179	14.792	0.78259	0.70509	0.48075	0.99999	Zdhhc1	"zinc finger, DHHC domain containing 1"
217166	-0.55838	16.668	0.79208	-0.70496	0.48084	0.99999	Nr1d1	"nuclear receptor subfamily 1, group D, member 1"
52432	-0.33495	42.501	0.47526	-0.70477	0.48095	0.99999	Ppp2r2d	"protein phosphatase 2, regulatory subunit B, delta"
67750	1.5843	2.0214	2.2486	0.70458	0.48107	0.99999	4930578I06Rik	RIKEN cDNA 4930578I06 gene
16330	-0.5642	14.287	0.80088	-0.70447	0.48114	0.99999	Inpp5b	inositol polyphosphate-5-phosphatase B
74440	0.34759	44.675	0.4935	0.70433	0.48123	0.99999	Cmip	c-Maf inducing protein
22428	-0.30799	55.56	0.43739	-0.70416	0.48133	0.99999	Dctn6	dynactin 6
72183	0.25939	85.979	0.36844	0.70402	0.48142	0.99999	Snx6	sorting nexin 6
214597	0.33277	44.473	0.47294	0.70362	0.48167	0.99999	Sidt2	"SID1 transmembrane family, member 2"
243300	0.62354	10.756	0.88755	0.70254	0.48234	0.99999	Nyap1	neuronal tyrosine-phosphorylated phosphoinositide 3-kinase adaptor 1
101739	-0.22191	143.34	0.31588	-0.70252	0.48236	0.99999	Psip1	PC4 and SFRS1 interacting protein 1
234549	-0.34565	46.075	0.49219	-0.70227	0.48251	0.99999	Heatr3	HEAT repeat containing 3
20892	-0.41165	29.826	0.5862	-0.70223	0.48253	0.99999	Cenpx	centromere protein X
110558	0.359	64.541	0.51123	0.70222	0.48254	0.99999	H2-Q9	"histocompatibility 2, Q region locus 9"
14793	-0.33765	70.499	0.48091	-0.70212	0.48261	0.99999	Cdca3	cell division cycle associated 3
67711	-0.35715	35.99	0.50919	-0.70141	0.48305	0.99999	Nsmce1	"NSE1 homolog, SMC5-SMC6 complex component"
241452	0.77241	6.7393	1.1015	0.70121	0.48317	0.99999	Dhrs9	dehydrogenase/reductase (SDR family) member 9
18432	-0.23661	194.39	0.33749	-0.70108	0.48325	0.99999	Mybbp1a	MYB binding protein (P160) 1a
21749	-0.41029	26.269	0.58537	-0.70091	0.48336	0.99999	Terf1	telomeric repeat binding factor 1
70967	0.53181	15.288	0.7589	0.70076	0.48345	0.99999	Eva1c	eva-1 homolog C (C. elegans)
27416	0.50622	17.547	0.72245	0.7007	0.48349	0.99999	Abcc5	"ATP-binding cassette, sub-family C (CFTR/MRP), member 5"
544752	0.3036	53.513	0.43354	0.70029	0.48374	0.99999	Tug1	taurine upregulated gene 1
52033	-0.27328	78.493	0.39028	-0.70022	0.48379	0.99999	Pbk	PDZ binding kinase
13434	0.6956	8.5267	0.99381	0.69993	0.48397	0.99999	Trdmt1	tRNA aspartic acid methyltransferase 1
75751	-0.30091	56.995	0.42998	-0.69982	0.48404	0.99999	Ipo4	importin 4
73608	-0.76088	6.7526	1.0875	-0.69968	0.48412	0.99999	Marveld3	MARVEL (membrane-associating) domain containing 3
99683	-0.29767	56.978	0.42546	-0.69964	0.48415	0.99999	Sec24b	"Sec24 related gene family, member B (S. cerevisiae)"
114255	0.48088	18.494	0.68748	0.69948	0.48425	0.99999	Dok4	docking protein 4
94232	-0.29656	60.309	0.42397	-0.69948	0.48425	0.99999	Ubqln4	ubiquilin 4
94067	-0.33414	44.801	0.47775	-0.69941	0.4843	0.99999	Mrpl43	mitochondrial ribosomal protein L43
14866	-0.49134	17.495	0.70252	-0.6994	0.48431	0.99999	Gstm5	"glutathione S-transferase, mu 5"
11749	-0.28353	118.63	0.40543	-0.69933	0.48434	0.99999	Anxa6	annexin A6
59050	0.22873	123	0.32732	0.6988	0.48468	0.99999	Nsa2	NSA2 ribosome biogenesis homolog
59014	-0.27994	84.725	0.40106	-0.698	0.48518	0.99999	Rrs1	ribosome biogenesis regulator 1
233871	-0.27266	101.03	0.39063	-0.698	0.48518	0.99999	Atxn2l	ataxin 2-like
54392	-0.33183	42.979	0.47548	-0.69789	0.48525	0.99999	Ncapg	"non-SMC condensin I complex, subunit G"
381314	-0.35578	38.306	0.50986	-0.6978	0.4853	0.99999	Iars2	"isoleucine-tRNA synthetase 2, mitochondrial"
30932	0.32124	52.68	0.46086	0.69705	0.48577	0.99999	Zfp330	zinc finger protein 330
56705	0.34223	41.227	0.49108	0.69688	0.48588	0.99999	Ranbp9	RAN binding protein 9
237211	-0.76305	6.7608	1.0953	-0.69663	0.48604	0.99999	Fancb	"Fanconi anemia, complementation group B"
18551	0.61491	10.765	0.88274	0.69659	0.48606	0.99999	Pcsk4	proprotein convertase subtilisin/kexin type 4
72309	-0.76296	6.7473	1.0954	-0.6965	0.48612	0.99999	Tmem158	transmembrane protein 158
117599	0.54861	13.506	0.78768	0.69649	0.48612	0.99999	Helb	helicase (DNA) B
67836	0.40307	27.262	0.57878	0.69642	0.48617	0.99999	Wdr83	WD repeat domain containing 83
11828	1.2347	2.5013	1.7734	0.69622	0.48629	0.99999	Aqp3	aquaporin 3
101401	1.2347	2.5013	1.7734	0.69622	0.48629	0.99999	Adamts9	"a disintegrin-like and metallopeptidase (reprolysin type) with thrombospondin type 1 motif, 9"
68401	-0.47955	17.986	0.68942	-0.69559	0.48669	0.99999	G6pc3	"glucose 6 phosphatase, catalytic, 3"
226419	-0.51872	15.23	0.74573	-0.69559	0.48669	0.99999	Dyrk3	dual-specificity tyrosine-(Y)-phosphorylation regulated kinase 3
216505	1.0112	3.7548	1.4541	0.69544	0.48678	0.99999	Pik3ip1	phosphoinositide-3-kinase interacting protein 1
66972	1.0112	3.7548	1.4541	0.69544	0.48678	0.99999	Slc25a23	"solute carrier family 25 (mitochondrial carrier; phosphate carrier), member 23"
64898	0.43091	27.428	0.6199	0.69513	0.48698	0.99999	Lpin2	lipin 2
67434	0.90288	4.9842	1.2995	0.69477	0.4872	0.99999	Ankrd33b	ankyrin repeat domain 33B
268373	-0.22607	2527.4	0.32542	-0.69469	0.48725	0.99999	Ppia	peptidylprolyl isomerase A
20316	0.32658	54.62	0.4702	0.69456	0.48733	0.99999	Sdf2	stromal cell derived factor 2
13518	0.25675	95.65	0.36971	0.69448	0.48738	0.99999	Dst	dystonin
11432	0.61767	10.781	0.88958	0.69434	0.48747	0.99999	Acp2	"acid phosphatase 2, lysosomal"
16988	1.2313	2.496	1.7737	0.69417	0.48757	0.99999	Lst1	leukocyte specific transcript 1
223752	0.41343	25.018	0.59584	0.69385	0.48778	0.99999	Gramd4	GRAM domain containing 4
13559	-0.48205	17.997	0.69483	-0.69378	0.48782	0.99999	E2f5	E2F transcription factor 5
76568	0.26281	78.975	0.37893	0.69356	0.48796	0.99999	Ift46	intraflagellar transport 46
66887	0.40121	27.736	0.57856	0.69346	0.48802	0.99999	Lonp2	"lon peptidase 2, peroxisomal"
28071	0.49943	16.256	0.72027	0.6934	0.48806	0.99999	Twistnb	twist basic helix-loop-helix transcription factor 1 neighbor
17775	0.21364	161.52	0.30823	0.69312	0.48823	0.99999	Laptm4a	lysosomal-associated protein transmembrane 4A
142682	0.35638	35.269	0.51421	0.69306	0.48827	0.99999	Zcchc14	"zinc finger, CCHC domain containing 14"
18595	0.70232	8.4781	1.0135	0.69298	0.48832	0.99999	Pdgfra	"platelet derived growth factor receptor, alpha polypeptide"
15273	0.5494	13.493	0.79287	0.69292	0.48836	0.99999	Hivep2	human immunodeficiency virus type I enhancer binding protein 2
217695	0.59301	11.252	0.85651	0.69236	0.48871	0.99999	Zfyve1	"zinc finger, FYVE domain containing 1"
105246846	1.0064	3.7442	1.4539	0.69222	0.4888	0.99999	Gm42067	"predicted gene, 42067"
18643	-0.15611	1395.7	0.22559	-0.69199	0.48894	0.99999	Pfn1	profilin 1
71198	0.56734	12.978	0.82017	0.69173	0.4891	0.99999	Otud1	OTU domain containing 1
66449	-0.75656	6.7363	1.0939	-0.69162	0.48918	0.99999	Pam16	presequence translocase-asssociated motor 16 homolog (S. cerevisiae)
17718	0.56954	1628.5	0.8237	0.69143	0.48929	0.99999	mt-Nd3	"NADH dehydrogenase 3, mitochondrial"
13626	-0.30466	58.151	0.44086	-0.69107	0.48952	0.99999	Eed	embryonic ectoderm development
27207	-0.18659	1974.5	0.27009	-0.69084	0.48966	0.99999	Rps11	ribosomal protein S11
103466	0.41386	28.44	0.59927	0.69061	0.48981	0.99999	Nt5dc3	5'-nucleotidase domain containing 3
268697	-0.23096	119.72	0.33449	-0.69049	0.48989	0.99999	Ccnb1	cyclin B1
56046	-0.42975	28.848	0.62242	-0.69045	0.48991	0.99999	Uqcc1	ubiquinol-cytochrome c reductase complex assembly factor 1
52551	0.25129	99.655	0.36414	0.69008	0.49014	0.99999	Sgta	"small glutamine-rich tetratricopeptide repeat (TPR)-containing, alpha"
19079	0.33348	44.08	0.48331	0.68998	0.49021	0.99999	Prkab1	"protein kinase, AMP-activated, beta 1 non-catalytic subunit"
24136	0.51381	15.733	0.74473	0.68993	0.49024	0.99999	Zeb2	zinc finger E-box binding homeobox 2
235050	0.77163	6.7769	1.119	0.68959	0.49045	0.99999	Zfp810	zinc finger protein 810
68735	-0.28741	61.799	0.41698	-0.68926	0.49066	0.99999	Mrps18c	mitochondrial ribosomal protein S18C
68520	0.42802	25.827	0.62138	0.68881	0.49094	0.99999	Zfyve21	"zinc finger, FYVE domain containing 21"
13836	0.21522	159.9	0.31247	0.68876	0.49097	0.99999	Epha2	Eph receptor A2
11564	-0.30981	53.317	0.45017	-0.6882	0.49132	0.99999	Adsl	adenylosuccinate lyase
26889	1.0004	3.7523	1.4541	0.68796	0.49148	0.99999	Cln8	CLN8 transmembrane ER and ERGIC protein
27360	-0.49257	17.457	0.71631	-0.68765	0.49167	0.99999	Add3	adducin 3 (gamma)
72590	-0.30885	50.447	0.44921	-0.68755	0.49174	0.99999	Ppme1	protein phosphatase methylesterase 1
67738	-0.23929	128.17	0.34804	-0.68752	0.49176	0.99999	Ppid	peptidylprolyl isomerase D (cyclophilin D)
15384	-0.18632	835.9	0.27115	-0.68714	0.492	0.99999	Hnrnpab	heterogeneous nuclear ribonucleoprotein A/B
18807	0.5026	16.245	0.73165	0.68694	0.49212	0.99999	Pld3	"phospholipase D family, member 3"
66413	-0.23849	106.94	0.34719	-0.68692	0.49213	0.99999	Psmd6	"proteasome (prosome, macropain) 26S subunit, non-ATPase, 6"
66505	0.29129	58.751	0.42425	0.6866	0.49234	0.99999	Zmynd11	"zinc finger, MYND domain containing 11"
13371	1.2383	2.5066	1.8041	0.68636	0.49249	0.99999	Dio2	"deiodinase, iodothyronine, type II"
50909	1.2383	2.5066	1.8041	0.68636	0.49249	0.99999	C1ra	"complement component 1, r subcomponent A"
18858	0.6526	10.214	0.95107	0.68617	0.49261	0.99999	Pmp22	peripheral myelin protein 22
213956	-0.99232	3.7513	1.4464	-0.68608	0.49266	0.99999	Fam83f	"family with sequence similarity 83, member F"
232440	-0.28292	71.1	0.41262	-0.68565	0.49293	0.99999	H2aj	H2J.A histone
18033	-0.27523	74.132	0.40144	-0.68561	0.49296	0.99999	Nfkb1	"nuclear factor of kappa light polypeptide gene enhancer in B cells 1, p105"
12576	0.32298	46.039	0.47119	0.68545	0.49306	0.99999	Cdkn1b	cyclin-dependent kinase inhibitor 1B
16922	0.41593	25.013	0.60686	0.68537	0.49311	0.99999	Phyh	phytanoyl-CoA hydroxylase
74105	-0.50179	15.737	0.73251	-0.68503	0.49333	0.99999	Gga2	"golgi associated, gamma adaptin ear containing, ARF binding protein 2"
433904	-0.99599	3.7595	1.4548	-0.68461	0.49359	0.99999	Ociad2	OCIA domain containing 2
69906	-0.44157	21.265	0.64517	-0.68442	0.49371	0.99999	Slc25a32	"solute carrier family 25, member 32"
76131	-0.40313	26.725	0.589	-0.68442	0.49371	0.99999	Depdc1a	DEP domain containing 1a
76205	0.36858	31.985	0.53862	0.6843	0.49379	0.99999	Stard3nl	STARD3 N-terminal like
112403	0.43144	22.276	0.63052	0.68427	0.49381	0.99999	Dxo	decapping exoribonuclease
14579	0.84051	6.219	1.2283	0.68427	0.49381	0.99999	Gem	GTP binding protein (gene overexpressed in skeletal muscle)
22258	0.27741	82.439	0.4059	0.68344	0.49433	0.99999	Usp4	ubiquitin specific peptidase 4 (proto-oncogene)
109241	0.71773	7.2515	1.0503	0.68337	0.49437	0.99999	Mbd5	methyl-CpG binding domain protein 5
18950	-0.39017	34.639	0.57098	-0.68332	0.4944	0.99999	Pnp	purine-nucleoside phosphorylase
24105	0.29237	65.637	0.42788	0.68329	0.49442	0.99999	Rbck1	RanBP-type and C3HC4-type zinc finger containing 1
16763	-0.30615	114.66	0.44812	-0.68318	0.49449	0.99999	Lad1	ladinin
94178	0.2974	56.733	0.43542	0.68302	0.4946	0.99999	Mcoln1	mucolipin 1
13854	-0.23755	101.52	0.34792	-0.68279	0.49474	0.99999	Epn1	epsin 1
12808	-0.99255	3.7378	1.4544	-0.68243	0.49497	0.99999	Cobl	cordon-bleu WH2 repeat
66161	-0.64634	8.9987	0.94746	-0.68219	0.49512	0.99999	Pop4	"processing of precursor 4, ribonuclease P/MRP family, (S. cerevisiae)"
15937	0.28984	665.6	0.42495	0.68205	0.49521	0.99999	Ier3	immediate early response 3
232560	-0.88165	4.9755	1.2929	-0.68192	0.49529	0.99999	Caprin2	caprin family member 2
28000	-0.20974	193.48	0.30763	-0.68179	0.49537	0.99999	Prpf19	pre-mRNA processing factor 19
66274	-0.52721	16.562	0.7737	-0.68142	0.49561	0.99999	Lyrm9	LYR motif containing 9
67041	-0.27223	77.875	0.39957	-0.68129	0.49569	0.99999	Oxct1	3-oxoacid CoA transferase 1
17717	0.14539	2624.4	0.21347	0.68108	0.49582	0.99999	mt-Nd2	"NADH dehydrogenase 2, mitochondrial"
76773	0.34263	38.968	0.50356	0.68043	0.49623	0.99999	Wdyhv1	WDYHV motif containing 1
68961	-0.40943	24.514	0.60192	-0.6802	0.49638	0.99999	Phkg2	"phosphorylase kinase, gamma 2 (testis)"
11487	0.30802	48.003	0.45287	0.68014	0.49641	0.99999	Adam10	a disintegrin and metallopeptidase domain 10
15185	0.42171	22.764	0.62012	0.68004	0.49648	0.99999	Hdac6	histone deacetylase 6
17319	0.16854	2142.4	0.24804	0.67946	0.49684	0.99999	Mif	macrophage migration inhibitory factor (glycosylation-inhibiting factor)
230726	0.40465	25.482	0.59574	0.67923	0.49699	0.99999	Rhbdl2	rhomboid like 2
66085	-0.21961	137.85	0.3236	-0.67866	0.49735	0.99999	Eif3f	"eukaryotic translation initiation factor 3, subunit F"
68917	0.48594	16.741	0.71607	0.67862	0.49738	0.99999	Hint2	histidine triad nucleotide binding protein 2
66169	-0.33961	41.925	0.50051	-0.67853	0.49744	0.99999	Tomm7	translocase of outer mitochondrial membrane 7
66066	0.40797	25.506	0.60149	0.67827	0.4976	0.99999	Gng11	"guanine nucleotide binding protein (G protein), gamma 11"
72392	0.81484	5.5099	1.2014	0.67823	0.49763	0.99999	Tmem175	transmembrane protein 175
30806	0.81484	5.5099	1.2014	0.67823	0.49763	0.99999	Adamts8	"a disintegrin-like and metallopeptidase (reprolysin type) with thrombospondin type 1 motif, 8"
66925	-0.21344	162.43	0.31488	-0.67784	0.49787	0.99999	Sdhd	"succinate dehydrogenase complex, subunit D, integral membrane protein"
66489	-0.19247	757.44	0.28403	-0.67762	0.49801	0.99999	Rpl35	ribosomal protein L35
208715	-0.25205	140.97	0.372	-0.67753	0.49807	0.99999	Hmgcs1	3-hydroxy-3-methylglutaryl-Coenzyme A synthase 1
108767	0.33567	114.31	0.49543	0.67753	0.49807	0.99999	Pnrc1	proline-rich nuclear receptor coactivator 1
214791	-0.60233	10.727	0.88906	-0.67749	0.49809	0.99999	Sertad4	SERTA domain containing 4
18971	-0.30556	48.722	0.45104	-0.67746	0.49811	0.99999	Pold1	"polymerase (DNA directed), delta 1, catalytic subunit"
16993	0.25082	82.534	0.37028	0.67737	0.49817	0.99999	Lta4h	leukotriene A4 hydrolase
216558	0.35716	35.209	0.52744	0.67714	0.49831	0.99999	Ugp2	UDP-glucose pyrophosphorylase 2
16319	-0.21281	139.04	0.31456	-0.67652	0.49871	0.99999	Incenp	inner centromere protein
72043	1.0152	3.7414	1.501	0.67631	0.49884	0.99999	Sulf2	sulfatase 2
68428	-0.58247	11.256	0.86127	-0.6763	0.49885	0.99999	Steap3	STEAP family member 3
231912	0.72203	7.2487	1.068	0.67607	0.499	0.99999	Katnal1	katanin p60 subunit A-like 1
110639	-0.45439	18.994	0.67213	-0.67604	0.49901	0.99999	Prps2	phosphoribosyl pyrophosphate synthetase 2
68549	-0.45439	18.994	0.67213	-0.67604	0.49901	0.99999	Sgo2a	shugoshin 2A
52024	0.72261	17.006	1.0693	0.67575	0.4992	0.99999	Ankrd22	ankyrin repeat domain 22
66998	-0.30698	53.837	0.45455	-0.67535	0.49945	0.99999	Psmd5	"proteasome (prosome, macropain) 26S subunit, non-ATPase, 5"
15983	-0.28285	63.307	0.41886	-0.67529	0.49949	0.99999	Ifrd2	interferon-related developmental regulator 2
72568	-0.48787	16.26	0.72258	-0.67517	0.49957	0.99999	Lin9	lin-9 homolog (C. elegans)
64050	0.28846	61.098	0.42756	0.67467	0.49988	0.99999	Yeats4	YEATS domain containing 4
21985	-0.25577	90.601	0.37922	-0.67448	0.50001	0.99999	Tpd52	tumor protein D52
56457	-0.31742	45.041	0.47065	-0.67444	0.50003	0.99999	Clptm1	cleft lip and palate associated transmembrane protein 1
68693	-0.24667	88.684	0.36579	-0.67436	0.50008	0.99999	Hnrnpul2	heterogeneous nuclear ribonucleoprotein U-like 2
236573	1.0177	3.7467	1.5093	0.67423	0.50016	0.99999	Gbp9	guanylate-binding protein 9
228662	0.45717	19.486	0.67836	0.67394	0.50035	0.99999	Btbd3	BTB (POZ) domain containing 3
16468	0.52973	21.157	0.78608	0.67389	0.50038	0.99999	Jarid2	"jumonji, AT rich interactive domain 2"
15400	0.44422	33.176	0.65958	0.67349	0.50064	0.99999	Hoxa3	homeobox A3
20878	-0.27478	73.106	0.40808	-0.67335	0.50072	0.99999	Aurka	aurora kinase A
240641	-0.35694	34.251	0.53044	-0.67292	0.501	0.99999	Kif20b	kinesin family member 20B
14302	0.5292	13.981	0.78662	0.67275	0.50111	0.99999	Frk	fyn-related kinase
75909	0.30228	96.066	0.44935	0.67271	0.50113	0.99999	Vmp1	vacuole membrane protein 1
13480	-0.46613	26.367	0.69383	-0.67182	0.5017	0.99999	Dpm1	dolichol-phosphate (beta-D) mannosyltransferase 1
11840	-0.17122	381.45	0.25492	-0.67168	0.50179	0.99999	Arf1	ADP-ribosylation factor 1
69870	0.54034	15.22	0.80481	0.67139	0.50197	0.99999	Polr3gl	polymerase (RNA) III (DNA directed) polypeptide G like
68346	0.62626	9.4972	0.93294	0.67127	0.50205	0.99999	Sirt5	sirtuin 5
21987	-0.35914	39.382	0.53507	-0.6712	0.5021	0.99999	Tpd52l1	tumor protein D52-like 1
20556	0.91265	5.0108	1.3601	0.67102	0.50221	0.99999	Slfn2	schlafen 2
22402	-1.2118	2.4839	1.806	-0.67101	0.50222	0.99999	Ccn4	cellular communication network factor 4
228576	-1.2118	2.4839	1.806	-0.67101	0.50222	0.99999	Mall	"mal, T cell differentiation protein-like"
16918	-1.2118	2.4839	1.806	-0.67101	0.50222	0.99999	Mycl	v-myc avian myelocytomatosis viral oncogene lung carcinoma derived
16878	0.38407	49.803	0.573	0.67028	0.50268	0.99999	Lif	leukemia inhibitory factor
57741	-0.25413	104.45	0.3793	-0.67	0.50286	0.99999	Noc2l	NOC2 like nucleolar associated transcriptional repressor
94044	-0.37188	38.616	0.55519	-0.66983	0.50297	0.99999	Bcl2l13	BCL2-like 13 (apoptosis facilitator)
229211	-0.34981	34.784	0.52246	-0.66954	0.50315	0.99999	Acad9	"acyl-Coenzyme A dehydrogenase family, member 9"
68736	-0.48936	16.236	0.73093	-0.6695	0.50318	0.99999	Tyw5	tRNA-yW synthesizing protein 5
64704	-0.29349	53.532	0.43848	-0.66935	0.50327	0.99999	Htra2	HtrA serine peptidase 2
16149	-0.57149	13.682	0.85399	-0.6692	0.50337	0.99999	Cd74	"CD74 antigen (invariant polypeptide of major histocompatibility complex, class II antigen-associated)"
11430	0.42086	22.791	0.62952	0.66853	0.50379	0.99999	Acox1	"acyl-Coenzyme A oxidase 1, palmitoyl"
29856	0.22419	149.56	0.33542	0.66838	0.50389	0.99999	Smtn	smoothelin
13202	0.32839	42.697	0.49151	0.66812	0.50406	0.99999	Ddt	D-dopachrome tautomerase
72029	0.35794	33.047	0.53596	0.66784	0.50423	0.99999	Cnpy3	canopy FGF signaling regulator 3
236899	-0.31208	80.529	0.46737	-0.66773	0.5043	0.99999	Pcyt1b	"phosphate cytidylyltransferase 1, choline, beta isoform"
30805	0.56613	11.735	0.84814	0.6675	0.50446	0.99999	Slc22a4	"solute carrier family 22 (organic cation transporter), member 4"
66101	-0.45665	18.992	0.68432	-0.6673	0.50458	0.99999	Ppih	peptidyl prolyl isomerase H
75620	0.36697	30.246	0.54998	0.66723	0.50463	0.99999	Kxd1	KxDL motif containing 1
74145	0.51109	14.493	0.766	0.66721	0.50464	0.99999	F13a1	"coagulation factor XIII, A1 subunit"
19654	0.29889	49.496	0.44801	0.66714	0.50468	0.99999	Rbm6	RNA binding motif protein 6
244418	-0.45177	21.922	0.67756	-0.66676	0.50493	0.99999	Prag1	PEAK1 related kinase activating pseudokinase 1
76178	-0.35787	32.018	0.53685	-0.66662	0.50501	0.99999	Coa5	cytochrome C oxidase assembly factor 5
19951	-0.1491	2521.1	0.22366	-0.66662	0.50502	0.99999	Rpl32	ribosomal protein L32
67291	-0.41212	24.546	0.61845	-0.66637	0.50517	0.99999	Ccdc137	coiled-coil domain containing 137
72826	0.28121	58.029	0.42215	0.66613	0.50533	0.99999	Fam76b	"family with sequence similarity 76, member B"
225849	0.52626	13.978	0.79063	0.66562	0.50565	0.99999	Ppp2r5b	"protein phosphatase 2, regulatory subunit B', beta"
66396	0.30673	45.762	0.46094	0.66545	0.50576	0.99999	Ccdc82	coiled-coil domain containing 82
14874	0.50757	14.523	0.76292	0.6653	0.50586	0.99999	Gstz1	glutathione transferase zeta 1 (maleylacetoacetate isomerase)
101869	-0.41885	22.227	0.62997	-0.66488	0.50613	0.99999	Unc45a	unc-45 myosin chaperone A
66592	-0.26615	72.337	0.40032	-0.66483	0.50616	0.99999	Stoml2	stomatin (Epb7.2)-like 2
53602	0.32451	40.974	0.48821	0.66469	0.50625	0.99999	Hpcal1	hippocalcin-like 1
13078	1.0163	3.7655	1.5292	0.66465	0.50628	0.99999	Cyp1b1	"cytochrome P450, family 1, subfamily b, polypeptide 1"
53357	0.47207	17.235	0.71028	0.66462	0.50629	0.99999	Pla2g6	"phospholipase A2, group VI"
56535	0.43233	20.516	0.65064	0.66447	0.50639	0.99999	Pex3	peroxisomal biogenesis factor 3
14042	0.40352	23.759	0.60739	0.66436	0.50646	0.99999	Ext1	exostosin glycosyltransferase 1
17997	0.38954	26.539	0.58638	0.66431	0.50649	0.99999	Nedd1	"neural precursor cell expressed, developmentally down-regulated gene 1"
71392	0.62976	10.75	0.948	0.6643	0.5065	0.99999	5430401F13Rik	RIKEN cDNA 5430401F13 gene
56367	0.22414	121.28	0.33749	0.66416	0.50659	0.99999	Scoc	short coiled-coil protein
77877	0.62395	9.5242	0.94002	0.66376	0.50684	0.99999	6030458C11Rik	RIKEN cDNA 6030458C11 gene
219022	0.38213	27.027	0.57654	0.6628	0.50746	0.99999	Ttc5	tetratricopeptide repeat domain 5
67025	-0.14872	1192.4	0.22439	-0.66278	0.50747	0.99999	Rpl11	ribosomal protein L11
231464	-0.36684	37.363	0.55351	-0.66275	0.50749	0.99999	Cnot6l	"CCR4-NOT transcription complex, subunit 6-like"
27376	-0.37618	34.604	0.56768	-0.66266	0.50755	0.99999	Slc25a10	"solute carrier family 25 (mitochondrial carrier, dicarboxylate transporter), member 10"
26934	-0.2219	114.03	0.33502	-0.66235	0.50775	0.99999	Racgap1	Rac GTPase-activating protein 1
18107	-0.3118	47.667	0.47092	-0.66212	0.5079	0.99999	Nmt1	N-myristoyltransferase 1
634731	-0.61244	9.5003	0.92501	-0.66209	0.50791	0.99999	Susd1	sushi domain containing 1
[truncated: 7,452 more rows]
